# Supplementary material for: Burden of Influenza and Respiratory Syncytial Virus Infection in Pregnant Women and Infants Under 6 Months in Mongolia: A Prospective Cohort Study
Source: PLoS One. 2016 Feb 5;11(2):e0148421. doi: 10.1371/journal.pone.0148421 (PMC4746066; doi:10.1371/journal.pone.0148421)
Supplement: S2 Dataset — (XLSX) [file pone.0148421.s002.xlsx]

## Sheet: Infant_ili
season	EnrolD	LeaveD	AgeEnrolGp	Gender	BirthWt	GestAgeDel	MedCondBirth	ili	InfectionOrder	Result	SympD	SympResD
1	2013-11-01	2013-11-08	1	2	3210	39-40	no	no	0	non-ili
2	2015-01-14	2015-04-30	1	1	3200	40	no	no	0	non-ili
2	2014-12-12	2015-04-30	1	1	3300	39-40	no	no	0	non-ili
2	2015-02-14	2015-04-30	1	2	2915	39	no	no	0	non-ili
2	2015-02-14	2015-04-30	1	2	2900	39	no	no	0	non-ili
2	2015-02-16	2015-04-30	1	2	3660	39-40	no	no	0	non-ili
2	2015-03-05	2015-04-30	1	1	3200	39-40	no	no	0	non-ili
2	2015-03-04	2015-04-30	1	2	3825	40	no	no	0	non-ili
2	2015-02-03	2015-04-30	1	2	3660	40	no	no	0	non-ili
2	2014-12-11	2015-04-30	1	2	3080	39-40	no	no	0	non-ili
2	2015-04-05	2015-04-30	1	2	3600	39-40	no	no	0	non-ili
2	2015-04-02	2015-04-30	1	2	3336	39-40	no	no	0	non-ili
2	2015-03-03	2015-04-30	1	1	3410	39-40	no	no	0	non-ili
2	2015-03-16	2015-04-30	1	2	2790	38-39	no	no	0	non-ili
2	2015-04-02	2015-04-30	1	2	3570	40	no	no	0	non-ili
2	2015-03-26	2015-04-30	1	1	3000	39-40	no	no	0	non-ili
2	2015-03-30	2015-04-30	1	2	2600	39	no	no	0	non-ili
2	2015-03-31	2015-04-30	1	2	3400	39-40	no	no	0	non-ili
2	2015-02-20	2015-04-30	1	1	3400	39-40	no	no	0	non-ili
1	2014-03-15	2014-04-30	1	2	3790	39-40	no	no	0	non-ili
2	2014-11-18	2015-04-30	1	1	2850	39	no	no	0	non-ili
2	2015-02-17	2015-04-30	1	1	3040	39	no	no	0	non-ili
1	2013-12-03	2014-04-30	1	1	4210	39-40	no	no	0	non-ili
1	2014-01-14	2014-04-30	1	1	3088	38-39	no	no	0	non-ili
1	2013-10-01	2014-03-17	1	2	3310	39-40	no	yes	1	neg	2013-11-15	4
2	2014-10-01	2015-03-16	1	1	3060	39-40	no	yes	1	neg	2015-01-22	8
2	2014-11-05	2015-04-20	1	2	3200	39-40	no	no	0	non-ili
2	2014-10-18	2015-04-02	1	1	3200	39-40	no	no	0	non-ili
2	2014-10-01	2015-03-16	1	2	3630	39-40	no	no	0	non-ili
1	2013-11-18	2014-04-30	1	1	3585	39-40	no	yes	1	notTested	2014-03-11	7
2	2014-12-03	2015-04-30	1	1	3480	39-40	no	no	0	non-ili
1	2014-01-02	2014-04-30	1	2	3425	39-40	no	no	0	non-ili
1	2013-12-21	2014-04-30	1	1	3600	39-40	no	no	0	non-ili
2	2015-03-02	2015-04-30	1	1	3290	39-40	no	no	0	non-ili
1	2014-01-25	2014-04-30	1	2	3450	39-40	no	no	0	non-ili
1	2014-02-18	2014-04-30	1	2	4240	39-40	no	no	0	non-ili
2	2015-01-02	2015-04-30	1	1	3520	39-40	no	no	0	non-ili
2	2015-04-15	2015-04-30	1	2	2500	39	no	no	0	non-ili
1	2013-10-05	2014-03-20	1	2	3410	39-40	no	yes	1	neg	2013-10-28	11
1	2013-10-22	2014-04-05	1	1	3270	39-40	no	no	0	non-ili
1	2013-10-29	2014-04-12	1	1	3160	37-38	no	no	0	non-ili
1	2013-10-29	2014-04-12	1	1	2800	37-38	no	no	0	non-ili
1	2013-10-09	2014-03-23	1	2	3350	39-40	no	no	0	non-ili
1	2013-10-09	2014-03-23	1	2	3365	39-40	no	yes	1	neg	2014-01-29	6
2	2014-10-10	2015-03-24	1	2	3280	39	no	no	0	non-ili
2	2014-10-15	2015-03-29	1	1	3560	39-40	no	no	0	non-ili
2	2014-11-07	2015-04-21	1	2	2800	39	no	no	0	non-ili
2	2014-10-08	2015-03-22	1	1	3010	39-40	no	no	0	non-ili
2	2014-10-20	2015-04-03	1	2	3400	39-40	no	no	0	non-ili
2	2014-10-26	2015-04-09	1	2	3280	39-40	no	no	0	non-ili
1	2013-10-07	2014-03-21	1	1	3830	40-41	no	no	0	non-ili
1	2013-11-11	2014-04-25	1	2	2365	37-38	yes	no	0	non-ili
1	2013-11-11	2014-04-25	1	2	3175	38-39	no	no	0	non-ili
1	2013-10-07	2014-03-21	1	2	3330	39-40	no	no	0	non-ili
1	2013-11-12	2014-04-26	1	1	3260	39-40	no	yes	1	A	2014-03-20	5
2	2014-11-20	2015-04-30	1	2	3400	39-40	no	no	0	non-ili
2	2014-10-28	2015-04-11	1	1	3245	39	no	no	0	non-ili
2	2014-11-03	2015-04-17	1	1	3790	40	no	no	0	non-ili
1	2013-11-11	2014-04-25	1	1	3330	39-40	no	no	0	non-ili
2	2014-11-14	2015-04-28	1	1	3400	39-40	no	no	0	non-ili
2	2014-12-04	2015-04-30	1	2	3020	39	no	no	0	non-ili
2	2014-11-08	2015-04-22	1	1	3410	39-40	no	yes	1	A	2015-02-04	6
2	2014-12-01	2015-04-30	1	1	3300	39-40	no	no	0	non-ili
1	2013-11-04	2014-04-18	1	2	3500	40-41	no	no	0	non-ili
1	2013-12-03	2014-04-30	1	2	3240	38-39	no	no	0	non-ili
2	2014-12-16	2015-04-30	1	1	3575	40	no	no	0	non-ili
1	2014-01-02	2014-04-30	1	2	3120	38-39	no	no	0	non-ili
2	2014-12-15	2015-04-30	1	1	3005	40	no	no	0	non-ili
2	2014-12-25	2015-04-30	1	2	3505	39-40	no	no	0	non-ili
2	2014-12-15	2015-04-30	1	1	3540	39-40	no	no	0	non-ili
1	2013-12-15	2014-04-30	1	2	3850	39-40	no	no	0	non-ili
1	2014-01-06	2014-04-30	1	2	2900	38-39	no	no	0	non-ili
2	2014-10-01	2015-03-15	1	1	3200	40	no	yes	1	A	2015-01-21	8
1	2014-01-02	2014-04-30	1	1	3270	39-40	no	no	0	non-ili
1	2014-01-02	2014-04-30	1	1	4035	39-40	no	no	0	non-ili
1	2014-01-02	2014-04-30	1	2	2200	38-39	yes	no	0	non-ili
2	2015-01-16	2015-04-30	1	2	3300	39-40	no	yes	1	neg	2015-02-22	9
2	2015-03-10	2015-04-30	1	1	2820	39	no	no	0	non-ili
1	2014-01-12	2014-04-30	1	1	3300	39-40	no	no	0	non-ili
1	2014-01-28	2014-04-30	1	1	3700	39-40	no	no	0	non-ili
2	2015-02-20	2015-04-30	1	1	3950	40	no	no	0	non-ili
2	2015-03-02	2015-04-30	1	1	3500	39-40	no	no	0	non-ili
1	2014-01-28	2014-04-30	1	2	2810	38-39	no	no	0	non-ili
1	2014-01-24	2014-04-30	1	2	3250	39-40	no	no	0	non-ili
1	2014-01-20	2014-04-30	1	1	3550	39-40	no	yes	1	neg	2014-02-13	7
2	2015-03-13	2015-04-30	1	1	3300	40	no	no	0	non-ili
1	2014-01-25	2014-04-30	1	1	3695	39-40	no	no	0	non-ili
1	2014-01-25	2014-04-30	1	1	2850	38-39	no	yes	1	neg	2014-03-09	4
1	2014-01-25	2014-04-30	1	1	3290	39-40	no	no	0	non-ili
1	2014-01-16	2014-04-30	1	1	3130	39-40	no	yes	1	neg	2014-02-21	3
2	2015-01-05	2015-04-30	1	1	3040	39	no	no	0	non-ili
2	2015-01-08	2015-04-30	1	2	3320	39-40	no	no	0	non-ili
1	2014-01-16	2014-04-30	1	1	3130	39-40	no	yes	2	neg	2014-03-31	4
2	2015-02-07	2015-04-30	1	2	3300	39	no	no	0	non-ili
1	2014-01-12	2014-04-30	1	1	3210	39-40	no	no	0	non-ili
2	2015-02-17	2015-04-30	1	2	3390	39-40	no	no	0	non-ili
1	2014-02-07	2014-04-30	1	1	3300	39-40	no	no	0	non-ili
2	2015-03-09	2015-04-30	1	2	3400	39	no	no	0	non-ili
2	2015-02-16	2015-04-30	1	2	3300	39-40	no	no	0	non-ili
1	2014-02-02	2014-04-30	1	1	3510	39-40	no	no	0	non-ili
1	2014-02-23	2014-04-30	1	1	3230	39-40	no	no	0	non-ili
2	2015-02-26	2015-04-30	1	2	3730	40	no	no	0	non-ili
2	2015-03-06	2015-04-30	1	1	3650	40	no	no	0	non-ili
2	2015-03-11	2015-04-30	1	1	3305	39-40	no	no	0	non-ili
1	2014-03-02	2014-04-30	1	1	4240	39-40	no	no	0	non-ili
2	2014-12-26	2015-04-30	1	1	3490	39-40	no	no	0	non-ili
2	2015-03-14	2015-04-30	1	2	3800	40	no	no	0	non-ili
1	2014-03-01	2014-04-30	1	1	3310	39-40	no	no	0	non-ili
1	2014-02-27	2014-04-30	1	1	3200	39-40	no	no	0	non-ili
2	2015-02-28	2015-04-30	1	2	4000	40	yes	no	0	non-ili
2	2015-01-16	2015-04-30	1	2	3300	39	no	no	0	non-ili
1	2014-03-02	2014-04-30	1	1	2500	38-39	no	no	0	non-ili
1	2014-02-24	2014-04-30	1	1	4200	39-40	no	no	0	non-ili
1	2014-02-24	2014-04-30	1	1	3280	39-40	no	no	0	non-ili
2	2015-04-13	2015-04-30	1	2	3380	39	no	no	0	non-ili
1	2013-11-22	2014-04-30	1	1	3450	39-40	no	yes	1	neg	2014-03-22	7
1	2014-03-07	2014-04-30	1	1	3300	39-40	no	no	0	non-ili
2	2015-03-16	2015-04-30	1	2	3400	39-40	no	no	0	non-ili
1	2014-03-15	2014-04-30	1	1	3600	39-40	no	no	0	non-ili
1	2014-03-20	2014-04-30	1	1	2900	38-39	no	no	0	non-ili
2	2015-04-10	2015-04-30	1	1	3300	40	no	no	0	non-ili
2	2015-04-21	2015-04-30	1	2	3480	39-40	no	no	0	non-ili
1	2014-03-19	2014-04-30	1	2	3020	39-40	no	no	0	non-ili
1	2014-02-12	2014-04-30	1	1	3290	39-40	no	no	0	non-ili
1	2014-03-01	2014-04-30	1	1	3100	39-40	no	no	0	non-ili
1	2014-02-10	2014-04-30	1	1	3240	39-40	no	no	0	non-ili
1	2013-12-02	2014-04-30	1	2	3700	39-40	no	no	0	non-ili
1	2013-10-02	2014-03-16	1	1	3600	39-40	no	no	0	non-ili
2	2014-11-08	2015-04-22	1	1	3400	40	no	no	0	non-ili
2	2014-11-16	2015-04-30	1	1	3500	40	no	no	0	non-ili
1	2013-10-11	2014-03-24	1	1	3490	39-40	no	no	0	non-ili
1	2013-10-28	2014-04-10	1	2	3965	39-40	no	no	0	non-ili
1	2013-10-08	2014-03-21	1	1	3130	37-38	no	yes	1	neg	2013-12-22	7
1	2013-10-08	2014-03-21	1	1	3130	37-38	no	yes	2	neg	2014-01-19	9
1	2013-10-28	2014-04-10	1	1	3820	39-40	no	yes	1	neg	2014-03-02	4
1	2013-10-28	2014-04-10	1	1	3820	39-40	no	yes	2	neg	2014-03-13	5
1	2013-10-11	2014-03-24	1	2	3200	37-38	no	noSari	0
1	2013-10-29	2014-04-11	1	2	3170	38-39	no	no	0	non-ili
1	2013-10-29	2014-04-11	1	2	3840	39-40	no	no	0	non-ili
1	2013-10-29	2014-04-11	1	1	3470	39-40	no	no	0	non-ili
2	2015-01-04	2015-04-30	1	1	3290	39-40	no	no	0	non-ili
2	2014-11-01	2015-04-14	1	2	2835	39-40	no	no	0	non-ili
2	2014-10-10	2015-03-23	1	2	4625	39-40	no	no	0	non-ili
2	2014-10-20	2015-04-02	1	2	3130	39-40	no	yes	1	A	2015-02-23	7
2	2014-10-10	2015-03-23	1	1	3400	39-40	no	yes	1	neg	2015-02-15	8
2	2014-10-10	2015-03-23	1	2	3280	39-40	no	yes	1	notTested	2015-01-03	9
2	2014-10-10	2015-03-23	1	2	3280	39-40	no	yes	2	neg	2015-01-31	12
2	2014-10-15	2015-03-28	1	1	3630	39-40	no	yes	1	notTested	2014-12-10	7
2	2014-10-13	2015-03-26	1	1	3485	39-40	no	no	0	non-ili
2	2014-10-24	2015-04-06	1	1	4100	39-40	no	no	0	non-ili
2	2014-11-01	2015-04-14	1	2	3600	39-40	no	no	0	non-ili
2	2014-10-23	2014-11-24	1	1	3280	39	no	yes	1	notTested	2014-11-18	9
1	2013-11-11	2014-04-24	1	1	3450	39-40	no	no	0	non-ili
1	2013-11-05	2014-04-18	1	1	3310	39-40	no	no	0	non-ili
2	2014-11-02	2015-04-15	1	2	3430	39	no	yes	1	neg	2015-01-01	14
2	2014-10-21	2015-04-03	1	1	3600	39	no	no	0	non-ili
1	2013-10-11	2014-03-24	1	1	3430	39-40	no	no	0	non-ili
2	2014-11-03	2015-04-16	1	1	3840	39-40	no	no	0	non-ili
2	2014-11-14	2015-04-27	1	2	3710	39	no	no	0	non-ili
2	2014-11-18	2015-04-30	1	2	3970	39-40	no	no	0	non-ili
2	2014-11-24	2015-04-30	1	2	3100	39-40	no	no	0	non-ili
2	2014-11-16	2015-04-29	1	1	3500	39	no	no	0	non-ili
1	2013-11-11	2014-04-24	1	1	3560	39-40	no	no	0	non-ili
1	2013-11-18	2014-04-30	1	1	3790	40-41	no	no	0	non-ili
2	2014-11-21	2015-04-30	1	1	4450	40	no	no	0	non-ili
1	2013-11-12	2014-04-25	1	2	3055	39-40	no	no	0	non-ili
1	2013-11-07	2014-04-20	1	1	2980	38-39	no	yes	1	neg	2014-02-23	9
1	2013-11-25	2014-04-30	1	1	3185	39-40	no	yes	1	neg	2014-01-06	8
1	2013-11-05	2014-04-18	1	2	3250	39-40	no	no	0	non-ili
1	2013-11-05	2014-04-18	1	1	2450	37-38	yes	yes	1	neg	2014-01-20	10
1	2013-11-09	2013-12-03	1	2	3425	39-40	no	no	0	non-ili
1	2013-11-11	2014-04-24	1	1	3119	38-39	no	no	0	non-ili
1	2013-11-21	2014-04-30	1	1	3330	39-40	no	no	0	non-ili
1	2013-11-05	2014-04-18	1	1	3530	39-40	no	no	0	non-ili
1	2013-11-19	2014-04-30	1	2	3315	39-40	no	no	0	non-ili
1	2013-12-09	2014-04-30	1	1	3375	39-40	no	no	0	non-ili
2	2014-12-02	2015-04-30	1	1	3035	39	no	no	0	non-ili
2	2014-11-28	2015-04-30	1	2	3700	40	no	no	0	non-ili
2	2014-12-15	2015-04-30	1	2	3200	39	no	no	0	non-ili
2	2014-12-10	2015-04-30	1	2	3280	39	no	no	0	non-ili
2	2015-01-05	2015-04-30	1	1	3200	39	no	no	0	non-ili
1	2013-12-16	2014-04-30	1	2	3180	38-39	no	noSari	0
1	2013-12-13	2014-04-30	1	1	3270	39-40	no	no	0	non-ili
2	2014-12-10	2015-04-30	1	2	3170	39-40	no	no	0	non-ili
2	2014-12-23	2015-04-30	1	2	3605	39-40	no	no	0	non-ili
2	2014-12-30	2015-04-30	1	1	4200	41	no	no	0	non-ili
1	2013-12-09	2014-04-30	1	1	3490	39-40	no	no	0	non-ili
1	2014-01-03	2014-04-30	1	2	3535	39-40	no	no	0	non-ili
2	2014-11-16	2015-04-29	1	2	3290	39-40	no	no	0	non-ili
2	2014-11-20	2015-04-30	1	2	3500	39-40	no	no	0	non-ili
1	2013-12-30	2014-04-30	1	2	3280	39-40	no	no	0	non-ili
1	2013-12-30	2014-04-30	1	1	3530	39-40	no	no	0	non-ili
1	2014-01-09	2014-04-30	1	1	3715	39-40	no	no	0	non-ili
1	2014-01-09	2014-04-30	1	2	3460	38-39	no	no	0	non-ili
1	2013-12-30	2014-04-30	1	2	3260	38-39	no	no	0	non-ili
1	2014-01-12	2014-04-30	1	2	3300	39-40	no	no	0	non-ili
2	2015-02-05	2015-04-30	1	1	3240	39-40	no	no	0	non-ili
1	2013-12-24	2014-04-30	1	2	2920	38-39	no	noSari	0
2	2015-01-17	2015-04-30	1	2	3300	39-40	no	no	0	non-ili
1	2014-01-08	2014-04-30	1	1	3485	39-40	no	no	0	non-ili
2	2015-01-14	2015-04-30	1	2	3465	39-40	no	no	0	non-ili
2	2015-02-15	2015-04-30	1	2	3150	40	no	no	0	non-ili
2	2015-02-27	2015-04-30	1	1	3560	39-40	no	no	0	non-ili
2	2015-03-09	2015-04-30	1	2	3100	39-40	no	no	0	non-ili
1	2014-01-27	2014-04-30	1	2	3300	39-40	no	no	0	non-ili
1	2014-01-28	2014-04-30	1	1	2900	38-39	no	no	0	non-ili
2	2015-02-02	2015-04-30	1	2	3670	40	no	no	0	non-ili
1	2014-01-21	2014-04-30	1	1	2705	37-38	no	no	0	non-ili
1	2014-01-28	2014-04-30	1	1	3150	38-39	no	no	0	non-ili
2	2015-01-20	2015-04-30	1	1	3160	39-40	no	no	0	non-ili
1	2014-01-17	2014-04-30	1	2	3455	38-39	no	no	0	non-ili
2	2015-02-10	2015-04-30	1	1	2905	39	no	no	0	non-ili
2	2015-01-20	2015-04-30	1	1	4050	40	no	no	0	non-ili
2	2015-01-24	2015-04-30	1	1	2665	39-40	no	no	0	non-ili
1	2013-12-03	2014-04-30	1	1	3460	39-40	no	yes	1	neg	2014-01-06	7
2	2015-01-16	2015-04-30	1	1	3400	39-40	no	no	0	non-ili
2	2015-03-20	2015-04-30	1	2	3600	39-40	no	no	0	non-ili
2	2015-01-28	2015-04-30	1	1	3665	39-40	no	no	0	non-ili
2	2015-02-03	2015-04-30	1	2	2780	39	no	yes	1	neg	2015-03-09	7
2	2015-02-03	2015-04-30	1	1	3260	39-40	no	no	0	non-ili
1	2014-01-25	2014-04-30	1	1	3150	38-39	no	no	0	non-ili
2	2015-02-21	2015-04-30	1	2	2715	39-40	no	no	0	non-ili
2	2015-01-05	2015-04-30	1	1	4090	40	no	no	0	non-ili
2	2015-01-21	2015-04-30	1	1	3490	40	no	no	0	non-ili
2	2015-01-23	2015-04-30	1	2	3590	39	no	no	0	non-ili
2	2015-02-13	2015-04-30	1	2	2960	39	no	no	0	non-ili
2	2015-02-14	2015-04-30	1	1	3035	39	no	no	0	non-ili
2	2015-02-17	2015-04-30	1	1	3400	39-40	yes	no	0	non-ili
2	2015-03-04	2015-04-30	1	1	3275	39-40	no	no	0	non-ili
2	2015-01-27	2015-04-30	1	1	2980	39	no	no	0	non-ili
2	2015-01-27	2015-04-30	1	1	3480	39-40	no	no	0	non-ili
2	2015-01-02	2015-04-30	1	1	3270	39	no	no	0	non-ili
1	2014-02-18	2014-04-30	1	1	3355	39-40	no	no	0	non-ili
2	2015-01-25	2015-04-30	1	1	3655	39	no	no	0	non-ili
2	2015-01-28	2015-04-30	1	1	3600	39-40	no	no	0	non-ili
2	2015-02-14	2015-04-30	1	1	3340	40-41	no	no	0	non-ili
2	2015-03-16	2015-04-30	1	1	3510	40	no	no	0	non-ili
2	2015-01-20	2015-04-30	1	1	3300	39	no	no	0	non-ili
1	2014-03-11	2014-04-30	1	1	3160	39-40	no	no	0	non-ili
2	2015-02-10	2015-04-30	1	1	3000	39	no	no	0	non-ili
1	2014-02-11	2014-04-30	1	1	3340	39-40	no	no	0	non-ili
2	2015-01-12	2015-04-30	1	2	3090	39	no	no	0	non-ili
1	2014-03-09	2014-04-30	1	1	3550	39-40	no	no	0	non-ili
2	2015-01-13	2015-04-30	1	1	3200	39-40	no	no	0	non-ili
1	2014-02-28	2014-04-30	1	1	3200	39-40	no	no	0	non-ili
2	2015-04-10	2015-04-30	1	2	3340	40	no	no	0	non-ili
2	2015-03-19	2015-04-30	1	2	3700	39	no	no	0	non-ili
1	2013-11-05	2014-04-18	1	1	3300	39-40	no	yes	1	notTested	2013-11-25	8
2	2015-03-07	2015-04-30	1	1	3400	40	no	no	0	non-ili
2	2015-03-14	2015-04-30	1	1	3410	39	no	no	0	non-ili
2	2015-03-09	2015-04-30	1	1	3300	39	no	no	0	non-ili
2	2015-03-17	2015-04-30	1	2	3400	39	no	no	0	non-ili
2	2015-03-10	2015-04-30	1	1	3400	39-40	no	no	0	non-ili
2	2015-03-07	2015-04-30	1	1	3200	39-40	no	no	0	non-ili
1	2014-04-10	2014-04-30	1	1	3010	39-40	no	no	0	non-ili
1	2014-04-20	2014-04-30	1	1	3240	39-40	no	no	0	non-ili
2	2015-03-10	2015-04-30	1	2	3490	39	no	no	0	non-ili
2	2015-03-17	2015-04-30	1	2	3400	39	no	no	0	non-ili
1	2014-03-25	2014-04-30	1	1	3370	39-40	no	yes	1	neg	2014-04-20	4
2	2015-03-23	2015-04-30	1	2	3500	39-40	no	no	0	non-ili
1	2014-03-27	2014-04-30	1	2	3290	39-40	no	no	0	non-ili
2	2015-04-21	2015-04-30	1	2	3700	40-41	no	no	0	non-ili
2	2015-04-12	2015-04-30	1	2	3100	40-41	no	no	0	non-ili
1	2014-04-13	2014-04-30	1	1	3810	39-40	no	no	0	non-ili
1	2014-04-20	2014-04-30	1	1	3700	39-40	no	no	0	non-ili
2	2015-04-17	2015-04-30	1	2	3800	39-40	no	no	0	non-ili
1	2014-03-01	2014-04-30	1	1	3600	39-40	no	no	0	non-ili
2	2014-11-20	2015-04-30	1	2	3260	39	no	yes	1	neg	2015-01-05	7
2	2014-11-20	2015-04-30	1	2	3260	39	no	yes	2	neg	2015-02-22	9
2	2014-11-20	2015-04-30	1	2	3260	39	no	yes	3	neg	2015-03-02	8
2	2014-11-27	2015-04-30	1	1	3535	39-40	no	no	0	non-ili
1	2014-03-20	2014-04-30	1	1	3200	39-40	no	no	0	non-ili
1	2013-12-17	2014-04-30	1	1	3680	39-40	no	no	0	non-ili
1	2013-11-20	2014-04-30	1	2	3210	39-40	no	no	0	non-ili
1	2013-11-05	2014-04-18	1	2	3400	39-40	no	no	0	non-ili
2	2014-11-28	2015-04-30	1	2	3900	39-40	no	no	0	non-ili
2	2014-11-10	2015-04-23	1	2	2880	40	no	no	0	non-ili
2	2014-11-03	2015-04-16	1	2	3200	39	no	no	0	non-ili
2	2014-11-27	2015-04-30	1	1	3400	39-40	no	no	0	non-ili
2	2014-12-02	2015-04-30	1	1	3300	39-40	no	no	0	non-ili
2	2015-04-20	2015-04-30	1	1	3200	39-40	no	no	0	non-ili
2	2015-04-22	2015-04-30	1	1	3300	39-40	no	no	0	non-ili
2	2015-04-17	2015-04-30	1	1	3200	39-40	no	no	0	non-ili
2	2015-03-07	2015-04-30	1	2	3290	39-40	no	no	0	non-ili
1	2013-11-04	2014-04-16	1	1	3340	40	no	yes	1	neg	2014-01-15	8
1	2013-11-02	2014-04-14	1	2	2630	37-38	no	no	0	non-ili
1	2013-10-28	2014-04-09	1	2	2930	37-38	no	no	0	non-ili
1	2013-11-01	2014-04-13	1	1	2850	37-38	no	no	0	non-ili
1	2013-11-01	2014-04-13	1	2	3315	39-40	no	no	0	non-ili
1	2013-10-19	2014-03-31	1	1	2710	37-38	no	no	0	non-ili
2	2014-10-20	2015-04-01	1	1	3400	39-40	no	yes	1	neg	2015-01-10	9
2	2014-10-20	2015-04-01	1	1	3500	39-40	no	no	0	non-ili
2	2014-10-20	2015-04-01	1	2	2930	39	no	no	0	non-ili
2	2014-10-22	2015-04-03	1	2	3615	39-40	no	no	0	non-ili
2	2014-11-01	2015-04-13	1	1	3350	39-40	no	no	0	non-ili
2	2014-10-20	2015-04-01	1	1	3600	39-40	no	no	0	non-ili
2	2014-11-03	2015-04-15	1	1	3400	39-40	no	yes	1	neg	2015-01-08	7
2	2014-11-01	2015-04-13	1	2	3400	39	no	no	0	non-ili
2	2014-11-10	2015-04-22	1	2	3190	39	no	no	0	non-ili
2	2014-11-02	2015-04-14	1	2	3545	39-40	no	yes	1	neg	2014-11-24	9
2	2014-11-14	2015-04-26	1	2	3200	39	no	no	0	non-ili
2	2014-10-20	2015-04-01	1	2	4350	40	no	no	0	non-ili
1	2013-11-08	2014-04-20	1	1	3145	38-39	no	no	0	non-ili
2	2014-11-08	2015-04-20	1	1	3050	39	no	yes	1	neg	2015-03-01	9
1	2013-11-19	2014-04-30	1	2	3410	39-40	no	no	0	non-ili
2	2014-11-08	2015-04-20	1	1	3050	39	no	yes	2	neg	2015-03-28	7
2	2014-11-08	2015-04-20	1	1	3050	39	no	yes	3	neg	2015-04-12	7
1	2013-11-25	2014-04-30	1	2	3995	39-40	no	no	0	non-ili
1	2013-11-25	2014-04-30	1	2	3250	39-40	no	no	0	non-ili
1	2013-11-15	2014-04-27	1	1	3065	39-40	no	yes	1	neg	2014-01-15	9
1	2013-11-15	2014-04-27	1	1	3065	39-40	no	yes	2	neg	2014-03-13	5
2	2014-10-26	2015-04-07	1	2	3280	39-40	no	no	0	non-ili
2	2014-11-27	2015-04-30	1	1	3500	40	no	no	0	non-ili
1	2013-11-23	2014-04-30	1	2	3200	39-40	no	no	0	non-ili
2	2014-11-23	2015-04-30	1	2	3200	39	no	yes	1	neg	2014-12-22	7
1	2013-11-23	2014-04-30	1	1	2700	38-39	no	no	0	non-ili
1	2013-12-03	2014-04-30	1	2	3520	39-40	no	no	0	non-ili
2	2014-12-10	2015-04-30	1	2	3370	39	no	no	0	non-ili
2	2014-12-17	2015-04-30	1	1	3400	39-40	no	no	0	non-ili
2	2014-12-19	2015-04-30	1	1	2760	39	no	no	0	non-ili
2	2015-01-06	2015-04-30	1	2	3925	40	no	no	0	non-ili
1	2013-11-19	2014-04-30	1	1	3440	39-40	no	noSari	0
1	2013-11-27	2014-04-30	1	2	3010	39-40	no	no	0	non-ili
2	2014-12-10	2015-04-30	1	2	4175	40	no	yes	1	neg	2015-01-09	6
2	2014-12-13	2015-04-30	1	1	3400	39-40	no	no	0	non-ili
1	2013-12-30	2014-04-30	1	1	3361	39-40	no	no	0	non-ili
1	2013-12-10	2014-04-30	1	1	3480	39-40	no	yes	1	neg	2014-02-05	9
2	2014-12-29	2015-04-30	1	1	3230	39	no	no	0	non-ili
1	2013-12-10	2014-04-30	1	1	3510	39-40	no	no	0	non-ili
2	2015-01-06	2015-04-30	1	1	3505	39	no	no	0	non-ili
1	2013-12-03	2014-04-30	1	1	3925	39-40	no	no	0	non-ili
1	2013-12-10	2014-04-30	1	1	3870	39-40	no	no	0	non-ili
2	2015-01-15	2015-04-30	1	2	3235	39-40	no	no	0	non-ili
1	2013-12-30	2014-04-30	1	1	3500	39-40	no	no	0	non-ili
1	2013-12-13	2014-04-30	1	1	3225	39-40	no	no	0	non-ili
2	2014-10-04	2015-03-16	1	2	3200	39-40	no	no	0	non-ili
1	2013-12-12	2014-04-30	1	1	3075	39-40	no	yes	1	neg	2014-02-14	4
1	2014-01-02	2014-04-30	1	2	3035	39-40	no	no	0	non-ili
1	2014-01-12	2014-04-30	1	2	3180	38-39	no	no	0	non-ili
2	2015-01-15	2015-04-30	1	2	3240	39-40	no	no	0	non-ili
2	2015-01-24	2015-04-30	1	1	3300	39-40	no	no	0	non-ili
2	2015-02-03	2015-04-30	1	2	3190	39	no	no	0	non-ili
1	2014-01-02	2014-04-30	1	1	3675	39-40	no	no	0	non-ili
1	2014-01-08	2014-04-30	1	1	3500	39-40	no	no	0	non-ili
2	2015-02-13	2015-04-30	1	1	3500	40	no	no	0	non-ili
2	2015-01-02	2015-04-30	1	1	3010	39-40	no	yes	1	A	2015-02-13	6
2	2014-10-03	2015-03-15	1	2	3200	39-40	no	yes	1	rsv	2015-02-10	6
1	2014-01-07	2014-04-30	1	2	2900	38-39	no	no	0	non-ili
2	2015-03-02	2015-04-30	1	2	2950	39	no	no	0	non-ili
1	2013-11-23	2014-04-30	1	1	2100	38-39	yes	yes	1	neg	2014-03-06	14
2	2015-01-28	2015-04-30	1	1	2705	39	no	no	0	non-ili
2	2015-02-14	2015-04-30	1	2	2950	39-40	no	yes	1	neg	2015-03-30	8
1	2014-01-28	2014-04-30	1	1	3250	38-39	no	no	0	non-ili
2	2015-01-25	2015-04-30	1	1	3470	39-40	no	no	0	non-ili
2	2015-02-24	2015-04-30	1	2	3325	39-40	no	no	0	non-ili
2	2015-02-26	2015-04-30	1	2	3820	40	no	no	0	non-ili
2	2015-03-02	2015-04-30	1	1	3160	39-40	no	no	0	non-ili
2	2015-01-26	2015-04-30	1	1	3500	39-40	no	no	0	non-ili
2	2015-02-04	2015-04-30	1	1	3190	39-40	no	no	0	non-ili
2	2015-02-11	2015-04-30	1	2	3210	39-40	no	no	0	non-ili
1	2014-01-25	2014-04-30	1	1	3695	39-40	no	no	0	non-ili
1	2013-12-15	2014-04-30	1	1	3600	38-39	no	yes	1	notTested	2014-03-05	6
2	2015-02-09	2015-04-30	1	2	3190	39-40	no	no	0	non-ili
2	2015-02-21	2015-04-30	1	2	2810	39	no	no	0	non-ili
2	2015-02-16	2015-04-30	1	1	3800	40	no	no	0	non-ili
1	2014-02-08	2014-04-30	1	1	3400	39-40	no	no	0	non-ili
2	2015-02-18	2015-04-30	1	2	3200	39	no	no	0	non-ili
2	2015-03-09	2015-04-30	1	2	3020	39-40	no	no	0	non-ili
2	2015-03-10	2015-04-30	1	2	3590	40	no	no	0	non-ili
2	2015-01-26	2015-04-30	1	1	3010	39-40	no	no	0	non-ili
1	2014-03-08	2014-04-30	1	1	3085	39-40	no	no	0	non-ili
2	2015-02-03	2015-04-30	1	2	3700	40	no	no	0	non-ili
1	2014-02-28	2014-04-30	1	2	3510	39-40	no	no	0	non-ili
2	2015-01-20	2015-04-30	1	1	3520	40	no	no	0	non-ili
1	2014-02-10	2014-04-30	1	1	3455	39-40	no	noSari	0
2	2015-02-02	2015-04-30	1	1	4360	39-40	no	no	0	non-ili
2	2015-01-15	2015-04-30	1	1	3270	39-40	no	no	0	non-ili
1	2014-03-08	2014-04-30	1	1	3550	39-40	no	no	0	non-ili
2	2015-01-17	2015-04-30	1	2	3300	39-40	no	no	0	non-ili
2	2014-12-24	2015-04-30	1	1	3400	40	no	no	0	non-ili
2	2014-12-30	2015-04-30	1	1	3300	39	no	no	0	non-ili
2	2014-12-24	2015-04-30	1	1	3200	39	no	no	0	non-ili
1	2014-03-09	2014-04-30	1	1	3600	39-40	no	no	0	non-ili
2	2015-02-14	2015-04-30	1	1	3900	40	no	no	0	non-ili
2	2014-12-02	2015-04-30	1	1	3020	39-40	no	no	0	non-ili
1	2014-02-24	2014-04-30	1	1	3700	39-40	no	no	0	non-ili
2	2014-12-28	2015-04-30	1	1	3200	39	no	no	0	non-ili
1	2014-01-29	2014-04-30	1	1	3000	39-40	no	no	0	non-ili
1	2014-02-11	2014-04-30	1	1	3200	39-40	no	no	0	non-ili
2	2015-03-16	2015-04-30	1	2	3100	40	no	no	0	non-ili
2	2015-02-28	2015-04-30	1	2	3290	40	no	yes	1	neg	2015-03-11	8
2	2015-04-08	2015-04-30	1	1	3700	39-40	no	no	0	non-ili
2	2015-04-10	2015-04-30	1	2	3430	39-40	no	no	0	non-ili
2	2015-04-13	2015-04-30	1	1	3700	40	no	no	0	non-ili
2	2015-03-12	2015-04-30	1	2	3300	39-40	no	no	0	non-ili
1	2014-03-10	2014-04-30	1	1	3220	39-40	no	no	0	non-ili
2	2015-04-13	2015-04-30	1	2	3200	39	no	no	0	non-ili
1	2014-04-05	2014-04-30	1	1	3040	39-40	no	no	0	non-ili
1	2014-03-15	2014-04-30	1	1	3290	39-40	no	no	0	non-ili
1	2014-04-13	2014-04-30	1	2	3100	39-40	no	no	0	non-ili
1	2014-04-13	2014-04-30	1	2	3580	39-40	no	no	0	non-ili
1	2014-04-13	2014-04-30	1	2	3490	39-40	no	no	0	non-ili
2	2015-04-13	2015-04-30	1	1	3600	40	no	no	0	non-ili
2	2015-04-10	2015-04-30	1	1	3690	40	no	no	0	non-ili
1	2014-03-25	2014-04-30	1	2	3610	39-40	no	no	0	non-ili
2	2015-03-25	2015-04-30	1	1	3300	39-40	no	no	0	non-ili
1	2014-04-20	2014-04-30	1	1	3170	39-40	no	no	0	non-ili
2	2015-04-17	2015-04-30	1	1	3400	39-40	no	no	0	non-ili
1	2014-03-20	2014-04-30	1	1	3300	39-40	no	no	0	non-ili
1	2014-02-02	2014-04-30	1	2	3700	39-40	no	no	0	non-ili
1	2014-03-25	2014-04-30	1	2	3100	39-40	no	no	0	non-ili
1	2014-01-06	2014-04-30	1	1	3290	38-39	no	no	0	non-ili
1	2014-01-17	2014-04-30	1	1	3460	39-40	no	no	0	non-ili
1	2014-02-27	2014-04-30	1	1	3100	39-40	no	no	0	non-ili
2	2014-11-10	2015-04-22	1	2	2900	39	no	yes	1	neg	2015-02-22	8
2	2014-11-10	2015-04-22	1	2	2900	39	no	yes	2	neg	2015-04-01	8
2	2014-12-30	2015-04-30	1	1	3200	39	no	no	0	non-ili
2	2015-02-04	2015-04-30	1	1	3300	39-40	no	no	0	non-ili
1	2013-10-18	2014-03-29	1	1	3400	39-40	no	no	0	non-ili
2	2014-10-05	2015-03-16	1	2	3300	39-40	no	no	0	non-ili
2	2014-10-16	2015-03-27	1	2	3500	39-40	no	yes	1	neg	2014-11-07	10
2	2014-10-16	2015-03-27	1	2	3500	39-40	no	yes	2	rsv	2014-12-16	9
2	2014-10-10	2015-03-21	1	2	2900	39-40	no	no	0	non-ili
2	2014-10-14	2015-03-25	1	1	3540	39-40	no	no	0	non-ili
2	2014-10-29	2015-04-09	1	1	3310	39	no	no	0	non-ili
2	2014-11-02	2015-04-13	1	1	3845	39-40	no	no	0	non-ili
2	2014-11-20	2015-04-30	1	1	3300	39-40	no	no	0	non-ili
2	2014-11-03	2015-04-14	1	2	3400	39-40	no	no	0	non-ili
2	2014-10-10	2015-03-21	1	1	3390	39-40	no	no	0	non-ili
2	2014-11-01	2015-04-12	1	1	2500	38	no	no	0	non-ili
1	2013-10-20	2014-03-31	1	1	2800	37-38	no	yes	1	neg	2014-03-24	3
1	2013-11-04	2014-04-15	1	2	3370	39-40	no	yes	1	A	2014-03-19	8
2	2014-10-28	2015-04-08	1	1	3500	39	no	no	0	non-ili
2	2014-10-08	2015-03-19	1	2	2895	39	no	noSari	0
1	2013-11-18	2014-04-29	1	2	3550	37-38	no	no	0	non-ili
1	2013-12-03	2014-04-30	1	1	3860	39-40	no	yes	1	notTested	2014-01-10	7
1	2013-10-27	2014-04-07	1	1	1636	36-37	yes	no	0	non-ili
1	2013-12-05	2014-04-30	1	2	3435	39-40	no	no	0	non-ili
1	2013-12-05	2014-04-30	1	1	3450	39-40	no	no	0	non-ili
2	2014-12-02	2015-04-30	1	2	3500	39-40	no	yes	1	neg	2014-12-25	11
2	2014-12-10	2015-04-30	1	1	4100	40	no	no	0	non-ili
2	2014-12-28	2015-04-30	1	2	3600	40	no	no	0	non-ili
2	2014-12-08	2015-04-30	1	1	1980	37-38	yes	no	0	non-ili
2	2014-11-30	2015-04-30	1	1	3200	39	no	no	0	non-ili
1	2013-11-17	2014-04-28	1	1	3450	39-40	no	no	0	non-ili
2	2014-12-21	2015-04-30	1	1	3200	39-40	no	no	0	non-ili
1	2014-01-03	2014-04-30	1	1	3675	39-40	no	no	0	non-ili
2	2015-01-06	2015-04-30	1	2	3255	39	no	no	0	non-ili
1	2013-12-10	2014-04-30	1	2	5010	39-40	no	no	0	non-ili
1	2013-12-07	2014-04-30	1	2	3300	39-40	no	no	0	non-ili
1	2014-01-02	2014-04-30	1	2	3310	39-40	no	no	0	non-ili
1	2013-12-18	2014-04-30	1	2	3340	38-39	no	noSari	0
1	2014-01-02	2014-04-30	1	1	3315	39-40	no	no	0	non-ili
2	2015-01-06	2015-04-30	1	2	3400	39-40	no	no	0	non-ili
2	2014-11-18	2015-04-29	1	2	3690	39-40	no	no	0	non-ili
1	2014-01-13	2014-04-30	1	1	3880	39-40	no	no	0	non-ili
1	2014-01-02	2014-04-30	1	1	3635	39-40	no	no	0	non-ili
1	2013-12-17	2014-04-30	1	1	3725	38-39	no	no	0	non-ili
1	2013-11-24	2014-04-30	1	2	1890	38-39	yes	no	0	non-ili
2	2015-01-23	2015-04-30	1	2	5100	40-41	no	no	0	non-ili
1	2014-02-04	2014-04-30	1	2	2680	38-39	no	no	0	non-ili
1	2014-02-14	2014-04-30	1	2	3050	39-40	no	no	0	non-ili
2	2015-02-20	2015-04-30	1	1	3100	39-40	no	no	0	non-ili
2	2015-01-28	2015-04-30	1	1	3400	39-40	no	no	0	non-ili
1	2013-12-12	2014-04-30	1	2	3240	39-40	no	yes	1	neg	2014-01-10	10
2	2015-02-16	2015-04-30	1	1	3380	39-40	no	no	0	non-ili
1	2014-02-05	2014-04-30	1	1	2600	38-39	no	no	0	non-ili
2	2015-02-02	2015-04-30	1	1	3020	39-40	no	no	0	non-ili
2	2015-02-03	2015-04-30	1	1	3500	39-40	no	no	0	non-ili
2	2015-02-18	2015-04-30	1	1	3680	40	no	no	0	non-ili
1	2013-11-04	2014-04-15	1	2	3090	39-40	no	yes	1	neg	2013-12-20	8
1	2013-11-04	2014-04-15	1	2	3090	39-40	no	yes	2	neg	2013-12-28	5
2	2015-01-23	2015-04-30	1	2	3400	40	no	no	0	non-ili
1	2014-02-26	2014-04-30	1	2	3560	39-40	no	no	0	non-ili
2	2015-01-24	2015-04-30	1	2	3010	39	no	yes	1	neg	2015-04-03	11
1	2014-02-14	2014-04-30	1	2	3580	39-40	no	no	0	non-ili
2	2014-12-20	2015-04-30	1	2	3800	40	no	no	0	non-ili
1	2014-02-14	2014-04-30	1	1	3630	39-40	no	no	0	non-ili
2	2014-12-02	2015-04-30	1	1	2900	38	no	no	0	non-ili
2	2014-11-25	2015-04-30	1	2	3000	39	no	no	0	non-ili
2	2015-01-14	2015-04-30	1	1	3470	39-40	no	no	0	non-ili
2	2015-02-04	2015-04-30	1	2	3210	39-40	no	no	0	non-ili
2	2014-12-02	2015-04-30	1	2	3190	39-40	no	no	0	non-ili
2	2015-03-27	2015-04-30	1	2	3600	39-40	no	no	0	non-ili
2	2015-03-30	2015-04-30	1	1	4770	40	no	no	0	non-ili
2	2015-04-09	2015-04-30	1	1	3375	39	no	no	0	non-ili
2	2015-04-03	2015-04-30	1	1	3550	39-40	no	no	0	non-ili
1	2014-04-01	2014-04-30	1	1	3460	39-40	no	no	0	non-ili
1	2014-04-01	2014-04-30	1	1	3600	39-40	no	no	0	non-ili
1	2014-03-15	2014-04-30	1	1	2000	38-39	yes	no	0	non-ili
1	2014-04-27	2014-04-30	1	1	3200	39-40	no	no	0	non-ili
2	2015-04-04	2015-04-30	1	1	3300	39-40	none	no	0	non-ili
1	2014-02-20	2014-04-30	1	1	2900	39-40	no	no	0	non-ili
1	2014-04-15	2014-04-30	1	1	3580	39-40	no	no	0	non-ili
1	2014-03-25	2014-04-30	1	2	2890	39-40	no	no	0	non-ili
1	2014-03-25	2014-04-30	1	2	3040	39-40	no	no	0	non-ili
1	2014-02-20	2014-04-30	1	1	3300	39-40	no	no	0	non-ili
1	2014-04-22	2014-04-30	1	2	2950	39-40	no	no	0	non-ili
1	2014-02-25	2014-04-30	1	2	3550	39-40	no	no	0	non-ili
2	2014-12-02	2015-04-30	1	2	3400	39-40	no	no	0	non-ili
2	2014-11-20	2015-04-30	1	2	3190	39	no	no	0	non-ili
2	2015-04-08	2015-04-30	1	2	3310	39-40	no	no	0	non-ili
1	2013-11-01	2014-04-11	1	2	3200	39-40	no	no	0	non-ili
2	2014-10-10	2015-03-20	1	1	3400	39-40	no	no	0	non-ili
2	2014-10-10	2015-03-20	1	1	3200	39-40	no	no	0	non-ili
1	2013-11-11	2014-04-21	1	2	3920	40	no	no	0	non-ili
1	2013-11-11	2014-04-21	1	1	4085	39-40	no	no	0	non-ili
1	2013-11-20	2014-04-30	1	2	3595	39-40	no	yes	1	neg	2013-12-22	12
1	2013-11-20	2014-04-30	1	2	3595	39-40	no	yes	2	neg	2014-01-20	8
1	2013-11-11	2014-04-21	1	1	4325	40-41	no	no	0	non-ili
2	2014-10-10	2015-03-20	1	1	3600	39-40	no	no	0	non-ili
1	2013-11-25	2014-04-30	1	1	3200	39-40	no	yes	1	neg	2014-01-06	8
1	2013-11-25	2014-04-30	1	1	3200	39-40	no	yes	2	neg	2014-02-21	5
2	2014-10-29	2015-04-08	1	2	3900	40	no	no	0	non-ili
2	2014-10-01	2015-03-11	1	2	3390	39-40	no	yes	1	neg	2014-12-02	9
2	2014-10-01	2015-03-11	1	2	3390	39-40	no	yes	2	neg	2015-01-12	7
2	2014-10-01	2015-03-11	1	2	3390	39-40	no	yes	3	neg	2015-01-22	7
2	2014-10-01	2015-03-11	1	2	3390	39-40	no	yes	4	neg	2015-02-18	13
1	2013-11-05	2014-04-15	1	1	2020	38-39	no	no	0	non-ili
1	2013-11-05	2014-04-15	1	1	1735	36-37	yes	no	0	non-ili
2	2015-01-28	2015-04-30	1	2	3300	39-40	no	no	0	non-ili
1	2013-11-04	2014-04-14	1	1	1900	36-37	yes	no	0	non-ili
1	2013-12-09	2014-04-30	1	2	3230	39-40	no	no	0	non-ili
1	2013-11-09	2014-04-19	1	2	3450	39-40	no	no	0	non-ili
2	2014-12-24	2015-04-30	1	2	3150	39-40	no	no	0	non-ili
2	2014-12-10	2015-04-30	1	2	3515	40	no	no	0	non-ili
1	2013-11-14	2014-04-24	1	1	3280	39-40	no	no	0	non-ili
1	2013-12-16	2014-04-30	1	2	3200	39-40	no	no	0	non-ili
1	2013-12-30	2014-01-03	1	1	3400	39-40	no	no	0	non-ili
1	2013-12-30	2014-04-30	1	1	3300	39-40	no	no	0	non-ili
1	2013-12-03	2014-04-30	1	1	3450	39-40	no	no	0	non-ili
1	2013-12-12	2014-04-30	1	2	5100	39-40	no	no	0	non-ili
1	2014-01-03	2014-04-30	1	2	3425	39-40	no	no	0	non-ili
1	2013-11-01	2014-04-11	1	1	3420	39-40	no	yes	1	neg	2014-03-25	6
1	2014-01-08	2014-04-30	1	1	3000	39-40	no	no	0	non-ili
1	2013-12-02	2014-04-30	1	2	2535	38-39	no	no	0	non-ili
1	2013-11-30	2014-04-30	1	1	2935	38-39	no	no	0	non-ili
1	2014-01-10	2014-04-30	1	1	3735	39-40	no	no	0	non-ili
1	2013-11-22	2014-04-30	1	1	3410	38-39	no	no	0	non-ili
1	2014-01-24	2014-04-30	1	1	3415	39-40	no	no	0	non-ili
1	2014-01-12	2014-04-30	1	2	3715	39-40	no	no	0	non-ili
1	2014-01-12	2014-04-30	1	2	3100	39-40	no	no	0	non-ili
1	2014-01-12	2014-04-30	1	2	2900	39-40	no	no	0	non-ili
1	2014-01-25	2014-04-30	1	1	3590	38-39	no	yes	1	neg	2014-03-06	5
1	2014-01-10	2014-04-30	1	2	3080	39-40	no	no	0	non-ili
2	2015-02-27	2015-04-30	1	1	2790	39	no	no	0	non-ili
2	2015-02-02	2015-04-30	1	1	3500	39-40	no	no	0	non-ili
2	2015-02-04	2015-04-30	1	2	3480	39	no	no	0	non-ili
1	2014-02-10	2014-04-30	1	2	3200	39-40	no	no	0	non-ili
1	2014-02-28	2014-04-30	1	1	3500	39-40	no	no	0	non-ili
1	2014-02-09	2014-04-30	1	1	4000	39-40	no	no	0	non-ili
1	2014-03-15	2014-04-30	1	2	3300	39-40	no	no	0	non-ili
1	2014-04-25	2014-04-30	1	2	3530	39-40	no	no	0	non-ili
1	2014-04-20	2014-04-30	1	1	3060	39-40	no	no	0	non-ili
1	2014-03-25	2014-04-30	1	2	3210	39-40	no	no	0	non-ili
1	2014-03-20	2014-04-30	1	2	3560	39-40	no	no	0	non-ili
1	2014-03-15	2014-04-30	1	1	3010	39-40	no	no	0	non-ili
1	2014-04-12	2014-04-30	1	1	3400	39-40	no	no	0	non-ili
1	2014-02-10	2014-04-30	1	1	3300	39-40	no	no	0	non-ili
1	2014-03-28	2014-04-30	1	1	3510	39-40	no	no	0	non-ili
2	2014-10-30	2015-04-09	1	2	3300	39	no	yes	1	neg	2015-02-20	10
2	2014-12-24	2015-04-30	1	1	3500	39-40	no	no	0	non-ili
1	2013-10-12	2014-03-21	1	2	2855	38-39	no	no	0	non-ili
1	2013-10-29	2014-04-07	1	2	3300	39-40	no	yes	1	neg	2014-04-01	6
1	2013-11-01	2014-04-10	1	1	3950	39-40	no	no	0	non-ili
1	2013-11-08	2014-04-17	1	1	3500	39-40	no	yes	1	neg	2014-04-10	5
2	2014-11-02	2015-04-11	1	2	3280	39-40	no	noSari	0
1	2013-11-20	2014-04-29	1	1	3460	39-40	no	no	0	non-ili
2	2014-11-10	2015-04-19	1	1	3080	39	no	no	0	non-ili
2	2014-10-01	2015-03-10	1	1	3590	39-40	no	yes	1	notTested	2014-12-05	10
2	2014-10-01	2015-03-10	1	1	3590	39-40	no	yes	2	neg	2014-12-24	5
2	2014-10-01	2015-03-10	1	1	3590	39-40	no	yes	3	neg	2015-01-17	9
2	2014-12-26	2015-04-30	1	1	3300	39-40	no	noSari	0
1	2013-11-16	2014-04-25	1	2	3090	39-40	no	no	0	non-ili
1	2013-12-10	2014-04-30	1	2	3400	39-40	no	yes	1	notTested	2013-12-15	7
2	2014-12-10	2015-04-30	1	2	3700	40	no	no	0	non-ili
1	2014-01-03	2014-04-30	1	2	3580	39-40	no	no	0	non-ili
1	2014-01-02	2014-04-30	1	2	3260	39-40	no	no	0	non-ili
1	2014-01-24	2014-04-30	1	1	3200	38-39	no	no	0	non-ili
1	2014-01-14	2014-04-30	1	1	3980	38-39	no	no	0	non-ili
1	2014-02-14	2014-04-30	1	2	2800	38-39	no	no	0	non-ili
1	2014-02-14	2014-04-30	1	2	2750	38-39	no	no	0	non-ili
1	2014-01-24	2014-04-30	1	1	3470	39-40	no	yes	1	B	2014-02-13	7
1	2014-01-24	2014-04-30	1	2	4400	39-40	no	no	0	non-ili
1	2014-01-10	2014-04-30	1	1	3650	39-40	no	no	0	non-ili
1	2014-01-25	2014-04-30	1	2	3010	39-40	no	no	0	non-ili
1	2014-02-12	2014-04-30	1	1	3200	39-40	no	no	0	non-ili
1	2014-02-01	2014-04-30	1	1	3360	39-40	no	no	0	non-ili
2	2014-12-10	2015-04-30	1	1	2800	39	no	no	0	non-ili
1	2014-02-20	2014-04-30	1	1	3400	39-40	no	no	0	non-ili
1	2014-02-11	2014-04-30	1	1	3400	39-40	no	yes	1	neg	2014-03-09	9
2	2015-04-03	2015-04-30	1	1	3400	38-39	no	no	0	non-ili
2	2015-04-04	2015-04-30	1	1	3190	38-39	no	no	0	non-ili
2	2015-04-03	2015-04-30	1	1	3510	39	no	no	0	non-ili
1	2014-03-30	2014-04-30	1	2	3200	39-40	no	no	0	non-ili
2	2015-04-03	2015-04-30	1	1	3300	39-40	no	no	0	non-ili
1	2014-04-04	2014-04-30	1	1	4240	39-40	no	no	0	non-ili
1	2014-02-27	2014-04-30	1	1	3020	39-40	no	no	0	non-ili
2	2015-02-01	2015-04-30	1	1	3590	39-40	no	no	0	non-ili
1	2014-02-02	2014-04-30	1	2	3060	39-40	no	no	0	non-ili
1	2014-03-15	2014-04-30	1	2	3020	39-40	no	no	0	non-ili
1	2013-10-11	2014-03-19	1	2	2800	37-38	no	yes	1	neg	2014-01-12	4
1	2013-10-29	2014-04-06	1	1	4015	40-41	no	yes	1	neg	2014-01-15	8
2	2014-11-01	2015-04-09	1	2	2300	39	yes	no	0	non-ili
2	2014-10-01	2015-03-09	1	2	3400	39-40	no	no	0	non-ili
1	2013-10-11	2014-03-19	1	2	2950	38-39	no	yes	1	neg	2014-02-04	7
2	2014-11-30	2015-04-30	1	2	2605	39	no	no	0	non-ili
1	2013-11-06	2014-04-14	1	2	1800	36-37	yes	no	0	non-ili
2	2015-01-03	2015-04-30	1	2	3380	39-40	no	no	0	non-ili
1	2013-12-30	2014-04-30	1	2	3440	39-40	no	yes	1	notTested	2014-01-27	3
1	2013-12-30	2014-04-30	1	2	3440	39-40	no	yes	2	neg	2014-03-08	10
2	2015-03-19	2015-04-30	1	2	3460	39-40	no	no	0	non-ili
2	2015-02-20	2015-04-30	1	2	2800	40	no	no	0	non-ili
1	2014-02-24	2014-04-30	1	1	3225	39-40	no	no	0	non-ili
1	2013-12-28	2014-04-30	1	1	3300	39-40	no	yes	1	neg	2014-03-27	5
1	2014-03-30	2014-04-30	1	1	3100	39-40	no	no	0	non-ili
1	2014-03-01	2014-04-30	1	2	3700	39-40	no	no	0	non-ili
1	2014-03-20	2014-04-30	1	2	3400	39-40	no	no	0	non-ili
1	2014-04-03	2014-04-30	1	1	3680	39-40	no	no	0	non-ili
1	2014-02-02	2014-04-30	1	1	3570	39-40	no	yes	1	neg	2014-03-04	7
1	2013-12-01	2014-04-30	1	2	3300	38-39	no	no	0	non-ili
1	2014-02-02	2014-04-30	1	1	3420	39-40	no	no	0	non-ili
1	2013-10-29	2014-04-05	1	2	3300	40	no	no	0	non-ili
2	2014-10-01	2015-03-08	1	2	2750	38-39	no	no	0	non-ili
2	2014-10-01	2015-03-08	1	1	3600	39-40	no	yes	1	neg	2014-11-10	8
2	2014-10-01	2015-03-08	1	1	3600	39-40	no	yes	2	rsv	2015-01-08	7
2	2014-10-01	2015-03-08	1	2	3280	39-40	no	no	0	non-ili
2	2014-10-01	2015-03-08	1	1	2300	39-40	yes	no	0	non-ili
2	2014-10-01	2015-03-08	1	1	2020	39-40	yes	no	0	non-ili
1	2013-11-04	2014-04-11	1	1	3210	39-40	no	no	0	non-ili
1	2013-10-14	2014-03-21	1	2	3330	39-40	no	no	0	non-ili
1	2013-12-09	2014-04-30	1	1	3210	38-39	no	yes	1	neg	2014-01-18	9
1	2013-12-09	2014-04-30	1	1	3210	38-39	no	yes	2	neg	2014-03-23	4
1	2013-12-30	2014-04-30	1	2	3160	39-40	no	no	0	non-ili
2	2015-04-03	2015-04-30	1	1	3590	40	no	no	0	non-ili
2	2015-04-03	2015-04-30	1	1	3500	39-40	no	no	0	non-ili
1	2014-02-15	2014-04-30	1	2	3450	39-40	no	no	0	non-ili
1	2014-01-05	2014-04-30	1	2	3500	39-40	no	no	0	non-ili
1	2014-03-01	2014-04-30	1	2	3400	39-40	no	no	0	non-ili
1	2014-01-20	2014-04-30	1	2	3300	39-40	no	no	0	non-ili
1	2014-02-15	2014-04-30	1	1	3450	39-40	no	no	0	non-ili
1	2014-03-17	2014-04-30	1	2	3200	39-40	no	no	0	non-ili
2	2014-10-01	2015-03-07	1	2	3000	39-40	no	yes	1	neg	2014-12-01	7
2	2014-10-01	2015-03-07	1	2	3000	39-40	no	yes	2	neg	2014-12-21	8
1	2013-10-20	2014-03-26	1	2	3000	39-40	no	no	0	non-ili
1	2013-11-01	2014-04-07	1	2	2800	38-39	no	no	0	non-ili
1	2013-12-03	2014-04-30	1	1	4012	40-41	no	yes	1	neg	2014-01-10	6
1	2013-12-17	2014-04-30	1	2	3870	39-40	no	no	0	non-ili
2	2014-12-10	2015-04-30	1	2	2700	39-40	no	no	0	non-ili
2	2014-12-10	2015-04-30	1	2	2300	39-40	yes	no	0	non-ili
1	2013-12-30	2014-04-30	1	1	3110	39-40	no	no	0	non-ili
1	2014-01-03	2014-04-30	1	1	3015	39-40	no	yes	1	neg	2014-02-26	8
1	2014-01-24	2014-04-30	1	1	2970	38-39	no	no	0	non-ili
1	2014-01-24	2014-04-30	1	1	3480	39-40	no	no	0	non-ili
2	2015-01-06	2015-04-30	1	1	3010	40	no	no	0	non-ili
1	2014-01-24	2014-04-30	1	2	2900	38-39	no	no	0	non-ili
2	2015-03-14	2015-04-30	1	2	3270	39-40	no	no	0	non-ili
1	2014-01-24	2014-04-30	1	1	3030	39-40	no	no	0	non-ili
1	2014-03-18	2014-04-30	1	2	3300	39-40	no	no	0	non-ili
1	2014-03-24	2014-04-30	1	1	3250	39-40	no	no	0	non-ili
1	2013-11-05	2014-04-11	1	1	3290	39-40	no	yes	1	neg	2014-03-18	2
1	2014-02-02	2014-04-30	1	2	3200	39-40	no	no	0	non-ili
1	2014-04-15	2014-04-30	1	2	3510	39-40	no	no	0	non-ili
1	2013-11-12	2014-04-17	1	2	2700	38-39	no	no	0	non-ili
1	2013-10-29	2014-04-03	1	2	3450	39-40	no	yes	1	neg	2014-01-12	5
2	2014-10-01	2015-03-06	1	1	3320	39-40	no	no	0	non-ili
2	2014-12-01	2015-04-30	1	2	3500	40	no	no	0	non-ili
2	2014-10-01	2015-03-06	1	2	3200	39	no	no	0	non-ili
1	2013-11-25	2014-04-30	1	2	3185	39-40	no	no	0	non-ili
1	2013-12-03	2014-04-30	1	1	3400	39-40	no	no	0	non-ili
1	2013-12-03	2014-04-30	1	1	3420	38-39	no	no	0	non-ili
1	2013-12-05	2014-04-30	1	1	3370	39-40	no	no	0	non-ili
1	2013-12-05	2014-04-30	1	1	3585	39-40	no	no	0	non-ili
1	2013-12-09	2014-04-30	1	1	3560	39-40	no	no	0	non-ili
1	2013-12-16	2014-04-30	1	2	3305	38-39	no	no	0	non-ili
1	2013-12-03	2014-04-30	1	1	3450	39-40	no	no	0	non-ili
1	2014-01-03	2014-04-30	1	1	3190	39-40	no	no	0	non-ili
2	2015-01-06	2015-04-30	1	1	3320	39-40	no	no	0	non-ili
1	2014-01-15	2014-04-30	1	1	3400	39-40	no	no	0	non-ili
2	2015-01-05	2015-04-30	1	2	4000	40	no	no	0	non-ili
1	2014-02-11	2014-04-30	1	1	3200	38-39	no	no	0	non-ili
1	2014-03-24	2014-04-30	1	1	3590	39-40	no	no	0	non-ili
1	2014-03-24	2014-04-30	1	1	3700	39-40	no	no	0	non-ili
1	2014-03-24	2014-04-30	1	1	3630	39-40	no	no	0	non-ili
1	2014-03-10	2014-04-30	1	2	3100	39-40	no	no	0	non-ili
1	2014-03-10	2014-04-30	1	2	2900	39-40	no	no	0	non-ili
1	2014-03-25	2014-04-30	1	2	3200	39-40	no	no	0	non-ili
1	2013-11-11	2014-04-15	1	1	3820	39-40	no	no	0	non-ili
1	2013-11-11	2014-04-15	1	1	3790	39-40	no	yes	1	notTested	2013-11-20	9
1	2013-11-11	2014-04-15	1	1	3790	39-40	no	yes	2	neg	2014-02-16	5
1	2013-10-29	2014-04-02	1	2	3360	37-38	no	no	0	non-ili
1	2013-10-29	2014-04-02	1	1	3250	39-40	no	yes	1	neg	2014-03-02	9
1	2013-10-01	2014-03-05	1	1	3010	39-40	no	yes	1	notTested	2013-10-24	5
2	2014-10-01	2015-03-05	1	2	3030	39-40	no	no	0	non-ili
1	2013-11-25	2014-04-29	1	1	2740	38-39	no	noSari	0
2	2014-10-01	2015-03-05	1	1	3580	39	no	yes	1	neg	2015-02-04	5
1	2013-12-05	2014-04-30	1	2	3020	38-39	yes	no	0	non-ili
1	2014-01-02	2014-04-30	1	2	2940	38-39	no	no	0	non-ili
1	2014-01-15	2014-04-30	1	2	2785	39-40	no	no	0	non-ili
1	2014-01-24	2014-04-30	1	2	3280	38-39	no	no	0	non-ili
1	2014-01-24	2014-04-30	1	1	3510	39-40	no	no	0	non-ili
2	2015-03-15	2015-04-30	1	1	3705	40	no	no	0	non-ili
1	2014-03-18	2014-04-30	1	1	2990	38-39	no	no	0	non-ili
1	2014-03-24	2014-04-30	1	1	3130	39-40	no	no	0	non-ili
1	2014-03-24	2014-04-30	1	1	3300	39-40	no	no	0	non-ili
2	2015-01-28	2015-04-30	1	1	2900	38	no	no	0	non-ili
1	2014-03-15	2014-04-30	1	2	3020	39-40	no	no	0	non-ili
1	2013-10-29	2014-04-01	1	2	2800	39-40	no	yes	1	neg	2014-03-30	4
1	2013-10-01	2014-03-04	1	2	3490	39-40	no	yes	1	notTested	2013-10-03	7
2	2014-10-01	2015-03-04	1	1	3500	39-40	no	no	0	non-ili
1	2013-11-25	2014-04-28	1	1	3450	39-40	no	no	0	non-ili
1	2013-12-16	2014-04-30	1	2	3180	39-40	no	no	0	non-ili
1	2013-12-16	2014-04-30	1	2	3510	38-39	no	no	0	non-ili
1	2013-12-17	2014-04-30	1	2	3555	39-40	no	yes	1	neg	2013-12-30	10
1	2013-12-17	2014-04-30	1	2	3555	39-40	no	yes	2	neg	2014-01-26	9
1	2013-12-17	2014-04-30	1	2	3550	39-40	no	yes	1	neg	2013-12-31	9
1	2014-01-03	2014-04-30	1	1	3500	39-40	no	no	0	non-ili
1	2014-01-15	2014-04-30	1	2	3535	39-40	no	no	0	non-ili
1	2014-01-24	2014-04-30	1	2	3080	38-39	no	no	0	non-ili
1	2014-01-24	2014-04-30	1	2	3200	39-40	no	no	0	non-ili
2	2015-03-16	2015-04-30	1	2	3490	39-40	no	no	0	non-ili
1	2014-03-18	2014-04-30	1	1	3450	39-40	no	no	0	non-ili
1	2014-03-18	2014-04-30	1	1	3170	39-40	no	no	0	non-ili
1	2014-03-24	2014-04-30	1	1	3475	39-40	no	no	0	non-ili
1	2014-01-24	2014-04-30	1	1	2100	38-39	yes	no	0	non-ili
1	2014-04-10	2014-04-30	1	1	3600	39-40	no	no	0	non-ili
1	2014-04-10	2014-04-30	1	1	3500	39-40	no	no	0	non-ili
1	2014-03-28	2014-04-30	1	1	3700	39-40	no	no	0	non-ili
2	2014-10-15	2015-03-18	1	2	3300	40	no	yes	1	neg	2014-11-15	10
2	2014-10-01	2015-03-03	1	2	3100	39	no	yes	1	A	2015-01-18	4
2	2014-10-01	2015-03-03	1	1	3500	39-40	no	no	0	non-ili
1	2013-11-12	2014-04-14	1	2	1900	36-37	yes	no	0	non-ili
2	2014-10-01	2015-03-03	1	1	3200	39-40	no	yes	1	neg	2015-02-03	7
1	2013-10-01	2014-03-02	1	1	3295	39-40	yes	yes	1	notTested	2013-10-27	8
1	2013-10-01	2014-03-02	1	1	3295	39-40	yes	yes	2	neg	2013-12-13	10
1	2013-10-01	2014-03-02	1	1	3295	39-40	yes	yes	3	neg	2014-02-27	7
2	2014-10-01	2015-03-01	1	2	3200	39-40	no	no	0	non-ili
1	2013-10-10	2014-03-10	1	2	3105	39-40	no	noSari	0
2	2014-10-01	2015-03-01	1	1	3050	39-40	no	no	0	non-ili
1	2013-10-01	2014-02-28	1	2	2715	37-38	no	yes	1	notTested	2013-10-15	7
2	2014-10-01	2015-02-28	1	2	3500	39-40	no	no	0	non-ili
2	2014-10-01	2015-02-28	1	1	3290	39-40	no	no	0	non-ili
2	2014-10-01	2015-02-28	1	1	3450	39-40	no	no	0	non-ili
1	2013-10-05	2014-03-04	1	1	3540	39-40	no	no	0	non-ili
2	2014-10-01	2015-02-27	1	1	3600	39-40	no	no	0	non-ili
1	2013-10-01	2014-02-27	1	2	3100	39-40	no	no	0	non-ili
2	2014-10-01	2015-02-26	1	2	3400	39-40	no	yes	1	neg	2015-01-12	8
1	2013-10-10	2014-03-07	1	2	3260	39-40	no	yes	1	neg	2014-01-20	7
2	2014-10-01	2015-02-25	1	2	3190	39-40	no	yes	1	notTested	2014-10-20	11
2	2014-10-01	2015-02-25	1	2	3190	39-40	no	yes	2	A	2015-01-21	8
2	2014-10-01	2015-02-25	1	1	3300	39-40	no	no	0	non-ili
2	2014-10-01	2015-02-25	1	2	3200	39-40	no	no	0	non-ili
1	2013-10-10	2014-03-06	1	2	3650	39-40	no	yes	1	B	2014-01-26	10
2	2014-10-01	2015-02-24	1	2	3300	39-40	no	no	0	non-ili
2	2014-10-01	2015-02-24	1	2	3500	39-40	no	no	0	non-ili
2	2014-10-01	2015-02-24	1	2	3860	39-40	no	no	0	non-ili
2	2014-10-01	2015-02-23	1	1	3435	39-40	no	yes	1	A	2015-02-11	5
2	2014-10-01	2015-02-23	1	2	3030	39	no	no	0	non-ili
2	2014-10-01	2015-02-21	1	1	3540	39-40	no	yes	1	neg	2015-02-01	9
2	2014-10-01	2015-02-21	1	1	3300	39-40	no	no	0	non-ili
2	2014-10-01	2015-02-20	1	2	4250	39-40	no	no	0	non-ili
2	2014-10-01	2015-02-20	1	1	3920	39-40	no	no	0	non-ili
1	2013-10-20	2014-03-11	1	2	3010	39-40	no	no	0	non-ili
2	2015-01-05	2015-04-30	1	1	3200	39	no	noSari	0
2	2014-10-01	2015-02-20	1	2	3400	39	no	no	0	non-ili
2	2014-10-01	2015-02-19	1	2	3610	39-40	no	yes	1	neg	2015-01-16	7
2	2014-10-01	2015-02-19	1	1	3280	39-40	no	no	0	non-ili
2	2014-10-01	2015-02-19	1	2	3080	39	no	no	0	non-ili
2	2014-10-01	2015-02-19	1	2	3250	39-40	no	no	0	non-ili
2	2014-10-01	2015-02-19	1	2	4350	39-40	no	yes	1	notTested	2014-12-16	9
2	2014-10-01	2015-02-19	1	1	3400	39-40	no	yes	1	neg	2015-01-05	7
2	2014-10-01	2015-02-19	1	1	3300	39-40	no	yes	1	A	2015-01-05	7
1	2013-10-28	2014-03-17	1	2	3550	39-40	no	no	0	non-ili
1	2013-10-28	2014-03-17	1	2	3850	40-41	no	no	0	non-ili
2	2014-10-01	2015-02-18	1	2	2435	38-39	no	yes	1	notTested	2014-11-24	11
1	2013-10-29	2014-03-17	1	2	3390	39-40	no	no	0	non-ili
2	2014-10-01	2015-02-17	1	1	3500	39-40	no	no	0	non-ili
2	2014-10-01	2015-02-17	1	1	3500	40	no	yes	1	notTested	2014-11-30	9
2	2014-10-01	2015-02-17	1	1	3500	40	no	yes	2	neg	2015-01-12	7
2	2014-10-01	2015-02-17	1	2	3480	39-40	no	no	0	non-ili
2	2014-10-01	2015-02-16	1	2	3145	39-40	no	no	0	non-ili
1	2013-10-20	2014-03-07	1	2	3070	39-40	no	no	0	non-ili
1	2013-10-20	2014-03-07	1	2	3090	39-40	no	no	0	non-ili
2	2014-10-01	2015-02-16	1	2	3200	39-40	no	no	0	non-ili
1	2013-10-29	2014-03-15	1	2	3265	39-40	no	no	0	non-ili
2	2014-10-01	2015-02-15	1	1	2980	38-39	no	yes	1	neg	2015-02-04	8
1	2013-10-29	2014-03-14	1	2	3145	39-40	no	yes	1	neg	2014-02-01	10
1	2013-10-29	2014-03-14	1	2	3145	39-40	no	yes	2	neg	2014-02-18	8
1	2013-10-29	2014-03-14	1	1	2960	37-38	no	no	0	non-ili
1	2013-10-29	2014-03-14	1	2	3025	39-40	no	no	0	non-ili
1	2013-10-29	2014-03-14	1	1	4075	40-41	no	no	0	non-ili
1	2013-10-28	2014-03-13	1	2	3430	39-40	no	yes	1	neg	2014-03-10	8
2	2014-10-01	2015-02-14	1	2	3900	39-40	no	no	0	non-ili
1	2013-10-29	2014-03-13	1	2	3460	40	no	yes	1	neg	2014-02-12	7
1	2013-10-29	2014-03-13	1	2	3550	39-40	no	no	0	non-ili
1	2013-10-29	2014-03-13	1	2	2450	37-38	yes	no	0	non-ili
1	2013-10-29	2014-03-13	1	1	3180	39-40	no	no	0	non-ili
2	2014-10-01	2015-02-13	1	1	3400	39-40	no	yes	1	neg	2014-12-23	7
2	2014-10-01	2015-02-13	1	1	3400	39-40	no	yes	2	neg	2015-01-08	7
2	2014-10-01	2015-02-13	1	1	3400	39-40	no	yes	3	neg	2015-02-01	9
2	2014-10-01	2015-02-13	1	1	3400	39-40	no	yes	1	neg	2014-11-10	7
2	2014-10-01	2015-02-13	1	2	3500	39-40	no	noSari	0
2	2014-10-01	2015-02-13	1	1	3710	39-40	no	no	0	non-ili
1	2013-10-20	2014-03-04	1	2	2220	37-38	yes	yes	1	rsv	2014-01-17	10
1	2013-10-20	2014-03-04	1	2	2220	37-38	yes	yes	2	rsv	2014-02-10	9
1	2013-10-29	2014-03-12	1	1	3210	39-40	no	yes	1	neg	2014-01-21	6
1	2013-10-29	2014-03-12	1	1	3465	39-40	no	yes	1	neg	2014-01-05	8
1	2013-10-29	2014-03-11	1	1	3600	39-40	no	yes	1	neg	2014-01-04	10
2	2014-10-01	2015-02-11	1	1	4665	39-40	no	yes	1	A	2015-01-18	9
2	2014-10-01	2015-02-11	1	2	3090	39-40	no	no	0	non-ili
1	2013-10-29	2014-03-10	1	2	3285	39-40	no	yes	1	A	2014-02-09	8
2	2014-10-01	2015-02-10	1	2	3370	39-40	no	no	0	non-ili
1	2013-10-29	2014-03-09	1	2	3450	39-40	no	no	0	non-ili
2	2014-10-01	2015-02-09	1	1	3030	39-40	no	no	0	non-ili
2	2014-10-01	2015-01-06	1	2	3180	39-40	no	yes	1	neg	2015-01-05	7
2	2014-10-01	2015-02-09	1	2	3635	39-40	no	yes	1	neg	2014-12-27	13
1	2013-10-29	2014-03-08	1	1	3090	39-40	no	no	0	non-ili
1	2013-10-28	2014-03-07	1	2	3080	39-40	no	no	0	non-ili
2	2014-10-01	2015-02-08	1	1	3600	39-40	no	no	0	non-ili
2	2014-10-01	2015-02-08	1	1	3100	39	no	no	0	non-ili
2	2015-03-09	2015-04-30	1	1	3455	39-40	no	no	0	non-ili
1	2013-10-29	2014-03-07	1	2	3455	39-40	no	no	0	non-ili
1	2013-10-29	2014-03-07	1	2	3175	39-40	no	no	0	non-ili
1	2013-10-29	2014-03-07	1	1	3299	39-40	no	no	0	non-ili
1	2013-10-28	2014-03-05	1	2	3540	39-40	no	no	0	non-ili
2	2014-10-01	2015-02-06	1	1	3200	39-40	no	yes	1	notTested	2014-12-08	7
2	2014-10-01	2015-02-06	1	2	3400	39-40	no	noSari	0
2	2014-10-01	2015-02-06	1	2	3170	39-40	no	yes	1	neg	2014-11-25	6
1	2013-10-29	2014-03-05	1	2	1900	37-38	yes	no	0	non-ili
1	2013-10-29	2014-03-05	1	1	3280	38-39	no	no	0	non-ili
1	2013-10-29	2014-03-05	1	2	3075	39-40	no	no	0	non-ili
1	2013-10-29	2014-03-05	1	2	3550	39-40	no	no	0	non-ili
1	2013-10-29	2014-03-05	1	2	3700	39-40	no	no	0	non-ili
2	2014-10-01	2015-02-05	1	2	3280	39-40	no	no	0	non-ili
2	2014-10-01	2015-02-05	1	2	3955	39-40	no	no	0	non-ili
2	2014-10-01	2015-02-05	1	2	3270	39	no	no	0	non-ili
1	2013-12-30	2014-04-30	1	1	3315	39-40	no	no	0	non-ili
1	2013-10-29	2014-03-04	1	1	3570	39-40	no	no	0	non-ili
1	2013-10-29	2014-03-04	1	1	3090	39-40	no	yes	1	notTested	2013-11-06	5
1	2013-10-29	2014-03-04	1	1	3700	39-40	no	yes	1	neg	2013-11-14	5
2	2014-10-01	2015-02-04	1	1	2740	39-40	no	yes	1	notTested	2014-12-19	10
2	2014-10-01	2015-02-04	1	1	2740	39-40	no	yes	2	neg	2015-01-09	6
2	2014-10-01	2015-02-04	1	1	3650	39-40	no	no	0	non-ili
2	2014-10-01	2015-02-04	1	1	3770	39-40	no	yes	1	neg	2014-11-23	8
2	2014-10-01	2015-02-04	1	2	3240	39-40	no	yes	1	notTested	2014-12-01	8
2	2014-10-01	2015-02-04	1	1	3845	39-40	no	no	0	non-ili
2	2014-10-01	2015-02-04	1	2	3400	39-40	no	no	0	non-ili
1	2013-10-29	2014-03-03	1	2	3695	39-40	no	yes	1	neg	2014-01-09	5
1	2013-10-29	2014-03-03	1	1	3650	39-40	no	yes	1	neg	2013-12-01	8
2	2014-10-01	2015-02-03	1	1	3170	39-40	no	no	0	non-ili
2	2014-10-01	2015-02-03	1	1	2935	38-39	no	no	0	non-ili
1	2013-10-20	2013-12-10	1	1	3340	39-40	no	no	0	non-ili
2	2014-10-01	2015-02-03	1	2	3200	39-40	no	yes	1	notTested	2014-10-29	8
2	2014-10-01	2015-02-03	1	2	3200	39-40	no	yes	2	neg	2015-01-01	11
2	2014-10-01	2015-02-02	1	1	3500	39-40	no	noSari	0
2	2014-10-01	2015-02-02	1	2	4730	39-40	no	yes	1	neg	2015-02-01	7
2	2014-10-01	2015-02-02	1	1	3140	39-40	no	no	0	non-ili
1	2013-10-29	2014-03-01	1	2	3300	39-40	no	yes	1	neg	2014-01-14	7
2	2014-10-01	2015-02-01	1	1	3400	39-40	no	no	0	non-ili
2	2014-10-01	2015-02-01	1	1	3470	39	no	yes	1	notTested	2014-10-14	6
2	2014-10-01	2015-02-01	1	2	3190	39-40	yes	yes	1	neg	2015-01-25	8
2	2014-10-01	2015-01-30	1	1	3100	39-40	no	no	0	non-ili
2	2014-10-01	2015-01-30	1	1	3100	39-40	no	yes	1	A	2015-01-24	9
1	2013-10-20	2014-02-18	1	2	3600	39-40	no	no	0	non-ili
1	2013-10-29	2014-02-26	1	1	3450	39-40	no	no	0	non-ili
1	2013-10-28	2014-02-25	1	1	3290	39-40	no	yes	1	neg	2014-01-19	9
2	2014-10-01	2015-01-29	1	1	3315	39-40	no	yes	1	neg	2014-11-13	7
2	2014-10-01	2015-01-29	1	1	3315	39-40	no	yes	2	neg	2015-01-13	6
2	2014-10-01	2015-01-29	1	2	2670	38-39	no	no	0	non-ili
2	2014-10-01	2015-01-29	1	1	3895	39-40	no	no	0	non-ili
1	2013-10-29	2014-02-25	1	2	3430	39-40	no	yes	1	neg	2014-01-03	10
1	2013-10-29	2014-02-25	1	2	3430	39-40	no	yes	2	A	2014-02-02	9
1	2013-10-29	2014-02-25	1	1	3580	39-40	no	yes	1	notTested	2014-02-11	7
1	2013-10-29	2014-02-25	1	1	3580	39-40	no	yes	2	neg	2014-02-18	9
1	2013-10-29	2014-02-25	1	2	3125	38-39	no	no	0	non-ili
1	2013-10-29	2014-02-25	1	2	3430	39-40	no	yes	1	neg	2014-02-10	8
1	2013-10-29	2014-02-25	1	2	3385	39-40	no	no	0	non-ili
2	2014-10-01	2015-01-28	1	1	3700	39-40	no	no	0	non-ili
1	2013-10-29	2014-02-24	1	2	3540	39-40	no	no	0	non-ili
1	2013-10-29	2014-02-24	1	2	3300	39-40	no	no	0	non-ili
1	2013-10-28	2014-02-23	1	1	3050	39-40	no	no	0	non-ili
1	2013-10-29	2014-02-23	1	2	3340	39-40	no	no	0	non-ili
1	2013-10-29	2014-02-23	1	1	3560	39-40	no	no	0	non-ili
1	2013-10-29	2014-02-23	1	1	3375	39-40	yes	no	0	non-ili
1	2013-10-28	2014-02-22	1	2	2770	37-38	no	no	0	non-ili
2	2014-10-01	2015-01-26	1	2	3570	39-40	no	yes	1	notTested	2014-12-04	7
2	2014-10-01	2015-01-26	1	2	3570	39-40	no	yes	2	neg	2015-01-26	7
2	2014-10-01	2015-01-26	1	2	3280	39-40	no	no	0	non-ili
2	2014-10-01	2015-01-26	1	2	3190	39	no	no	0	non-ili
1	2013-10-11	2014-02-05	1	2	3270	39-40	no	yes	1	neg	2014-01-04	5
1	2013-10-29	2014-02-22	1	2	3560	39-40	no	no	0	non-ili
1	2013-10-29	2014-02-21	1	1	4210	40-41	no	no	0	non-ili
1	2013-10-29	2014-02-21	1	2	3200	39-40	no	no	0	non-ili
1	2013-10-28	2014-02-20	1	2	3000	39-40	no	no	0	non-ili
2	2014-10-01	2015-01-24	1	1	3410	39-40	no	yes	1	neg	2014-11-28	5
1	2013-10-01	2014-01-24	1	2	3050	39-40	no	no	0	non-ili
1	2013-10-29	2014-02-20	1	2	3350	39-40	no	no	0	non-ili
1	2013-10-29	2014-02-20	1	2	3170	39-40	no	no	0	non-ili
2	2014-10-01	2015-01-23	1	2	3600	39-40	no	no	0	non-ili
2	2014-10-01	2015-01-23	1	1	3450	39	no	no	0	non-ili
2	2014-10-01	2015-01-23	1	1	3665	39-40	no	no	0	non-ili
2	2014-10-01	2015-01-23	1	2	3340	39-40	no	no	0	non-ili
2	2014-10-01	2015-01-23	1	2	3400	39-40	no	yes	1	neg	2014-11-24	7
2	2014-10-01	2015-01-23	1	2	3055	39-40	no	yes	1	neg	2014-11-16	10
1	2013-10-29	2014-02-19	1	2	3350	39-40	no	no	0	non-ili
1	2013-10-29	2014-02-19	1	1	3600	39-40	no	no	0	non-ili
1	2013-10-29	2014-02-19	1	1	3280	39-40	no	no	0	non-ili
1	2013-10-29	2014-02-19	1	2	3160	39-40	no	yes	1	B	2014-01-19	5
2	2014-10-01	2015-01-22	1	1	3190	39-40	no	yes	1	neg	2015-01-07	8
2	2014-10-01	2015-01-22	1	1	3100	39-40	no	no	0	non-ili
1	2013-10-20	2014-02-10	1	1	3400	39-40	no	no	0	non-ili
1	2013-10-29	2014-02-17	2	1	3540	40-41	yes	yes	1	neg	2013-12-08	9
1	2013-10-29	2014-02-17	2	1	3180	39-40	no	no	0	non-ili
2	2014-10-01	2015-01-20	2	2	3360	39-40	no	no	0	non-ili
1	2013-10-29	2014-02-16	2	1	3310	39-40	no	yes	1	notTested	2013-12-02	7
1	2013-10-28	2014-02-15	2	2	3450	39-40	no	yes	1	neg	2014-02-09	4
2	2014-10-01	2015-01-19	2	2	3000	39	no	noSari	0
2	2014-10-01	2015-01-19	2	2	3690	39-40	no	no	0	non-ili
1	2013-10-28	2014-02-14	2	1	3785	39-40	no	no	0	non-ili
1	2013-10-28	2014-02-13	2	2	3480	39-40	no	yes	1	neg	2013-12-31	7
1	2013-10-28	2014-02-13	2	2	3270	39-40	no	no	0	non-ili
2	2014-10-01	2015-01-17	2	1	3400	39-40	no	no	0	non-ili
2	2014-10-01	2015-01-17	2	1	2690	39-40	no	no	0	non-ili
2	2014-10-01	2015-01-16	2	1	3000	39	no	yes	1	notTested	2014-12-03	9
2	2014-10-01	2015-01-16	2	2	3150	39-40	no	yes	1	neg	2015-01-07	9
1	2013-10-28	2014-02-12	2	2	3070	39-40	no	no	0	non-ili
1	2013-10-28	2014-02-11	2	1	4360	40-41	no	yes	1	notTested	2013-11-05	6
1	2013-10-28	2014-02-11	2	1	4360	40-41	no	yes	2	neg	2014-01-02	4
2	2014-10-01	2015-01-15	2	1	3385	37-38	no	yes	1	neg	2014-11-10	7
2	2014-10-01	2015-01-15	2	2	4200	39-40	no	no	0	non-ili
2	2014-10-01	2015-01-15	2	2	3300	39-40	no	no	0	non-ili
1	2013-10-28	2014-02-11	2	2	3505	39-40	no	yes	1	neg	2014-01-26	9
2	2014-10-01	2015-01-15	2	2	3700	39-40	no	no	0	non-ili
1	2013-10-20	2014-02-03	2	2	4000	40-41	no	no	0	non-ili
1	2013-10-29	2014-02-11	2	2	4500	40-41	no	no	0	non-ili
1	2013-10-28	2014-02-10	2	1	3300	39-40	no	noSari	0
1	2013-10-28	2014-02-10	2	1	2730	37-38	no	no	0	non-ili
2	2014-10-01	2015-01-14	2	2	3490	39-40	no	no	0	non-ili
2	2014-10-01	2015-01-14	2	2	3380	39-40	no	yes	1	notTested	2015-01-08	8
1	2013-10-20	2014-02-02	2	1	2980	39-40	no	no	0	non-ili
1	2013-10-28	2014-02-09	2	1	3415	39-40	no	no	0	non-ili
2	2014-10-01	2015-01-13	2	2	3600	39-40	no	no	0	non-ili
2	2014-10-01	2015-01-13	2	2	3140	39-40	no	no	0	non-ili
2	2014-10-01	2015-01-13	2	1	2935	39	no	no	0	non-ili
2	2014-10-01	2015-01-13	2	1	3400	39-40	no	no	0	non-ili
2	2015-03-03	2015-04-30	2	1	3010	39-40	no	no	0	non-ili
1	2013-10-28	2014-02-08	2	1	3690	39-40	no	no	0	non-ili
1	2013-10-20	2014-01-31	2	1	3240	39-40	no	no	0	non-ili
1	2013-10-28	2014-02-07	2	2	3280	39-40	no	no	0	non-ili
2	2014-10-01	2015-01-11	2	1	3225	39-40	no	no	0	non-ili
1	2013-10-28	2014-02-07	2	2	3110	39-40	no	no	0	non-ili
1	2013-10-28	2014-02-07	2	2	3330	39-40	no	no	0	non-ili
1	2013-10-01	2014-01-11	2	2	3360	39-40	no	yes	1	notTested	2013-10-08	7
1	2013-10-20	2014-01-30	2	1	3150	39-40	no	no	0	non-ili
1	2013-10-28	2014-02-06	2	1	3630	39-40	no	no	0	non-ili
2	2014-10-01	2015-01-10	2	2	3105	39-40	no	no	0	non-ili
2	2014-10-01	2015-01-10	2	2	2900	38	no	yes	1	notTested	2014-12-07	10
2	2014-10-01	2015-01-10	2	2	3400	39-40	no	no	0	non-ili
2	2014-10-01	2015-01-09	2	1	3090	39-40	no	no	0	non-ili
1	2013-10-28	2014-02-05	2	2	2910	37-38	no	no	0	non-ili
2	2014-10-01	2015-01-09	2	1	2970	39-40	no	yes	1	notTested	2014-12-05	6
2	2014-10-01	2015-01-09	2	1	2970	39-40	no	yes	2	neg	2015-01-03	11
2	2014-10-01	2015-01-09	2	1	3390	39-40	no	yes	1	notTested	2014-12-14	9
2	2014-10-01	2015-01-09	2	2	2875	39-40	no	yes	1	notTested	2014-10-27	8
2	2014-10-01	2015-01-09	2	2	2875	39-40	no	yes	2	notTested	2014-12-05	6
2	2014-10-01	2015-01-09	2	2	2875	39-40	no	yes	3	notTested	2015-01-04	11
1	2013-10-28	2014-02-04	2	2	4165	40-41	no	no	0	non-ili
2	2014-10-01	2015-01-08	2	2	2915	39-40	no	no	0	non-ili
2	2014-10-01	2015-01-08	2	2	3220	38-39	no	yes	1	neg	2014-11-11	6
2	2014-10-01	2015-01-08	2	2	3400	39-40	no	no	0	non-ili
1	2013-10-20	2014-01-27	2	1	3420	39-40	no	no	0	non-ili
1	2013-10-28	2014-02-03	2	2	4300	40-41	no	no	0	non-ili
1	2013-10-28	2014-02-03	2	1	3450	39-40	no	no	0	non-ili
2	2014-10-01	2015-01-07	2	1	2710	38-39	no	no	0	non-ili
2	2014-10-01	2015-01-07	2	2	3010	39-40	no	no	0	non-ili
2	2014-10-01	2015-01-07	2	1	3456	39-40	no	no	0	non-ili
2	2014-10-01	2015-01-07	2	1	3200	39-40	no	no	0	non-ili
1	2013-10-20	2014-01-26	2	1	3340	39-40	no	no	0	non-ili
1	2013-10-28	2014-02-02	2	1	3375	39-40	no	yes	1	neg	2014-01-17	7
2	2014-10-01	2015-01-06	2	1	3300	39-40	no	yes	1	notTested	2014-12-07	7
2	2014-10-01	2015-01-06	2	2	3800	39-40	no	no	0	non-ili
1	2013-10-28	2014-02-01	2	1	3870	39-40	no	yes	1	neg	2014-01-25	10
2	2014-10-01	2015-01-05	2	2	3700	39-40	no	no	0	non-ili
2	2014-10-01	2015-01-05	2	1	3805	38	no	no	0	non-ili
2	2014-10-01	2015-01-05	2	1	3690	39-40	no	no	0	non-ili
1	2013-12-09	2014-03-15	2	1	3650	39-40	no	no	0	non-ili
1	2013-10-28	2014-01-31	2	2	3610	39-40	no	yes	1	neg	2014-01-10	10
1	2013-10-28	2014-01-30	2	2	3180	39-40	no	no	0	non-ili
1	2013-10-28	2014-01-30	2	2	3210	39-40	no	yes	1	neg	2013-12-23	11
1	2013-10-28	2014-01-30	2	1	2450	37-38	yes	no	0	non-ili
2	2014-10-01	2015-01-03	2	2	3145	39-40	no	no	0	non-ili
2	2014-10-01	2015-01-03	2	2	3290	39	no	noSari	0
1	2013-10-28	2014-01-29	2	2	3630	39-40	yes	no	0	non-ili
1	2013-10-28	2014-01-29	2	2	3340	39-40	no	no	0	non-ili
1	2013-10-20	2014-01-21	2	1	3300	39-40	no	no	0	non-ili
2	2014-10-01	2015-01-01	2	2	2500	39-40	no	no	0	non-ili
1	2013-10-20	2014-01-20	2	2	3260	39-40	no	no	0	non-ili
1	2013-10-28	2014-01-27	2	2	3010	39-40	no	no	0	non-ili
1	2013-10-28	2014-01-27	2	2	3035	39-40	no	no	0	non-ili
2	2014-10-01	2014-12-31	2	2	2300	38-39	yes	no	0	non-ili
2	2014-10-01	2014-12-31	2	1	3600	39-40	no	no	0	non-ili
2	2014-10-01	2014-12-31	2	1	3300	39-40	no	no	0	non-ili
2	2014-10-01	2014-12-30	2	2	3230	39-40	no	yes	1	neg	2014-11-15	11
2	2014-10-01	2014-12-30	2	1	2865	39-40	no	no	0	non-ili
1	2013-10-28	2014-01-25	2	2	4170	40-41	no	no	0	non-ili
1	2013-10-28	2014-01-25	2	2	3595	39-40	no	no	0	non-ili
1	2013-10-28	2014-01-25	2	1	2650	39-40	no	no	0	non-ili
1	2013-10-28	2014-01-25	2	1	2900	37-38	no	no	0	non-ili
2	2014-10-01	2014-12-29	2	2	2985	39-40	no	no	0	non-ili
2	2014-10-01	2014-12-29	2	2	3655	39-40	no	no	0	non-ili
2	2014-10-01	2014-12-28	2	2	3400	39-40	no	no	0	non-ili
1	2013-10-28	2014-01-24	2	2	3355	39-40	no	no	0	non-ili
1	2013-10-28	2014-01-24	2	2	3740	39-40	no	yes	1	neg	2014-01-24	7
1	2013-10-18	2014-01-14	2	1	2780	38-39	no	yes	1	notTested	2013-11-27	7
1	2013-10-18	2014-01-14	2	2	2190	37-38	yes	no	0	non-ili
1	2013-10-11	2014-01-07	2	1	3460	39-40	no	no	0	non-ili
1	2013-10-28	2014-01-23	2	2	3340	39-40	no	no	0	non-ili
1	2013-10-28	2014-01-23	2	1	3550	39-40	no	no	0	non-ili
1	2013-10-28	2014-01-23	2	1	2900	37-38	no	no	0	non-ili
1	2013-10-28	2014-01-23	2	2	2350	37-38	yes	yes	1	neg	2014-01-19	11
1	2013-10-28	2014-01-23	2	1	3175	39-40	no	no	0	non-ili
2	2014-10-01	2014-12-27	2	1	3320	39-40	no	no	0	non-ili
2	2014-10-01	2014-12-27	2	1	3590	39-40	no	no	0	non-ili
2	2014-10-01	2014-12-27	2	2	3450	39-40	no	no	0	non-ili
1	2013-10-18	2014-01-13	2	2	3340	39-40	no	no	0	non-ili
1	2013-10-18	2014-01-12	2	1	3300	39-40	no	yes	1	neg	2014-01-05	8
2	2014-10-01	2014-12-25	2	1	3300	39	no	yes	1	rsv	2014-12-16	7
1	2013-10-28	2014-01-21	2	2	3295	39-40	no	yes	1	neg	2013-12-07	5
1	2013-10-28	2014-01-21	2	2	3295	39-40	no	yes	2	neg	2014-01-05	9
1	2013-10-28	2014-01-21	2	1	3460	39-40	no	yes	1	neg	2013-11-26	7
1	2013-10-28	2014-01-21	2	1	3460	39-40	no	yes	2	rsv	2014-01-14	10
2	2014-10-01	2014-12-25	2	1	2160	38-39	yes	no	0	non-ili
1	2013-10-18	2014-01-11	2	1	3750	39-40	no	no	0	non-ili
2	2014-10-01	2014-12-25	2	1	3410	39-40	no	yes	1	notTested	2014-10-21	9
2	2014-10-01	2014-12-24	2	1	3200	39	no	yes	1	notTested	2014-12-07	7
1	2013-10-28	2014-01-20	2	2	3750	39-40	no	no	0	non-ili
2	2014-10-01	2014-12-24	2	1	3765	39-40	no	yes	1	notTested	2014-11-11	10
1	2013-10-18	2014-01-10	2	1	3170	39-40	no	no	0	non-ili
1	2013-10-18	2014-01-10	2	2	2700	37-38	no	no	0	non-ili
1	2013-10-18	2014-01-10	2	2	3285	39-40	no	no	0	non-ili
1	2013-10-28	2014-01-19	2	1	3635	39-40	no	no	0	non-ili
1	2013-10-28	2014-01-19	2	1	3280	39-40	no	no	0	non-ili
2	2014-10-01	2014-12-23	2	2	3000	39-40	no	no	0	non-ili
2	2014-10-01	2014-12-23	2	2	3656	39	no	no	0	non-ili
1	2013-10-28	2014-01-18	2	1	3590	39-40	no	no	0	non-ili
1	2013-10-18	2014-01-08	2	2	2525	39-40	no	no	0	non-ili
1	2013-10-18	2014-01-08	2	1	3620	39-40	no	yes	1	neg	2013-11-25	8
1	2013-10-10	2013-12-31	2	2	3430	39-40	no	yes	1	neg	2013-12-30	8
2	2014-10-01	2014-12-21	2	2	3520	39-40	no	no	0	non-ili
1	2013-10-28	2014-01-16	2	1	3800	40-41	no	no	0	non-ili
1	2013-10-28	2014-01-16	2	1	3745	39-40	yes	no	0	non-ili
1	2013-10-28	2014-01-16	2	1	3365	39-40	no	no	0	non-ili
2	2014-10-01	2014-12-19	2	1	3100	39-40	no	no	0	non-ili
1	2013-10-28	2014-01-15	2	2	3615	39-40	no	no	0	non-ili
1	2013-10-18	2014-01-05	2	2	2820	39-40	no	no	0	non-ili
1	2013-10-18	2014-01-05	2	1	3260	39-40	no	no	0	non-ili
2	2014-10-01	2014-12-19	2	2	3400	39-40	no	yes	1	notTested	2014-12-03	8
2	2014-10-01	2014-12-19	2	2	3400	39-40	no	no	0	non-ili
2	2014-10-01	2014-12-18	2	2	3675	39-40	no	yes	1	notTested	2014-11-13	8
2	2014-10-01	2014-12-18	2	2	3530	39-40	no	no	0	non-ili
1	2013-10-18	2014-01-04	2	2	2900	39-40	no	no	0	non-ili
1	2013-10-18	2014-01-04	2	2	3200	39-40	no	yes	1	notTested	2013-12-04	9
1	2013-10-18	2014-01-04	2	2	3370	39-40	no	no	0	non-ili
2	2014-10-01	2014-12-17	2	1	3700	40-41	no	no	0	non-ili
2	2014-10-01	2014-12-17	2	1	3350	39-40	no	no	0	non-ili
2	2014-10-01	2014-12-17	2	2	2680	39-40	no	no	0	non-ili
2	2014-10-01	2014-12-17	2	2	3055	39-40	no	no	0	non-ili
2	2014-10-01	2014-12-17	2	2	3700	40	no	no	0	non-ili
2	2014-10-01	2014-12-17	2	2	3200	39-40	no	no	0	non-ili
2	2014-10-01	2014-12-16	2	2	3455	39-40	no	no	0	non-ili
2	2014-10-01	2014-12-16	2	1	3590	39-40	no	no	0	non-ili
2	2014-10-01	2014-12-15	2	2	4255	39-40	no	no	0	non-ili
2	2014-10-01	2014-12-15	2	1	3300	40	no	no	0	non-ili
2	2014-10-01	2014-12-14	2	1	3500	39-40	no	no	0	non-ili
2	2014-10-01	2014-12-14	2	2	3300	39	no	no	0	non-ili
1	2013-11-01	2014-01-14	2	2	2555	39-40	no	no	0	non-ili
2	2014-10-01	2014-12-14	2	2	4060	40	no	no	0	non-ili
2	2014-10-01	2014-12-14	2	2	3400	39-40	no	yes	1	notTested	2014-10-06	7
2	2014-12-30	2015-03-14	2	2	3100	39-40	no	yes	1	A	2015-01-08	7
1	2013-10-18	2013-12-30	2	1	3885	40-41	no	no	0	non-ili
2	2014-10-01	2014-12-13	2	1	3300	39	no	yes	1	neg	2014-11-29	9
2	2014-10-01	2014-12-12	2	1	1900	36-37	yes	no	0	non-ili
1	2013-10-28	2014-01-08	2	2	3015	39-40	yes	no	0	non-ili
1	2013-11-01	2014-01-12	2	1	3670	39-40	no	no	0	non-ili
1	2013-11-01	2014-01-12	2	2	3200	39-40	no	no	0	non-ili
1	2013-10-18	2013-12-29	2	1	2975	39-40	no	no	0	non-ili
2	2014-10-01	2014-12-12	2	1	3120	39-40	no	no	0	non-ili
2	2014-10-01	2014-12-12	2	1	2860	39-40	no	no	0	non-ili
2	2014-10-01	2014-12-12	2	2	3700	40	no	no	0	non-ili
2	2014-10-01	2014-12-11	2	2	3440	39-40	no	yes	1	neg	2014-11-08	5
2	2014-10-01	2014-12-11	2	1	4080	39-40	no	no	0	non-ili
1	2013-10-20	2013-12-30	2	2	3480	39-40	no	no	0	non-ili
2	2014-10-01	2014-12-10	2	1	3400	39-40	no	no	0	non-ili
1	2013-10-28	2014-01-06	2	2	2900	37-38	no	yes	1	neg	2014-01-01	6
1	2013-10-28	2014-01-06	2	1	3265	39-40	no	no	0	non-ili
2	2014-10-01	2014-12-10	2	2	3010	39-40	no	no	0	non-ili
2	2014-10-01	2014-12-09	2	1	3570	39-40	no	noSari	0
2	2014-10-01	2014-12-09	2	1	2840	39-40	no	no	0	non-ili
2	2014-10-01	2014-12-09	2	2	2900	38-39	no	no	0	non-ili
1	2013-10-18	2013-12-26	2	2	4010	40-41	no	yes	1	notTested	2013-11-07	8
1	2013-10-18	2013-12-26	2	2	3100	39-40	no	no	0	non-ili
1	2013-10-01	2013-12-09	2	2	3855	40-41	no	yes	1	notTested	2013-10-08	7
1	2013-10-11	2013-12-19	2	1	3090	38-39	no	no	0	non-ili
2	2014-10-01	2014-12-08	2	2	3385	37-38	no	yes	1	rsv	2014-11-23	8
2	2014-10-01	2014-12-08	2	2	3140	39-40	no	yes	1	notTested	2014-12-08	11
1	2013-10-18	2013-12-25	2	2	3090	39-40	no	no	0	non-ili
1	2013-10-18	2013-12-25	2	2	3150	39-40	no	yes	1	notTested	2013-10-21	7
1	2013-10-18	2013-12-25	2	1	3210	39-40	no	no	0	non-ili
2	2014-10-01	2014-12-06	2	1	3190	39-40	no	noSari	0
1	2013-10-28	2014-01-02	2	1	3110	39-40	no	no	0	non-ili
1	2013-10-28	2014-01-02	2	1	3670	39-40	no	noSari	0
1	2013-10-28	2014-01-01	2	2	3430	39-40	no	no	0	non-ili
2	2014-10-01	2014-12-04	2	2	2970	39-40	no	no	0	non-ili
2	2014-10-01	2014-12-04	2	1	2675	38-39	no	no	0	non-ili
1	2013-10-28	2013-12-31	2	2	3800	40-41	no	no	0	non-ili
2	2014-10-01	2014-12-04	2	1	3300	39-40	no	no	0	non-ili
2	2014-10-01	2014-12-03	2	1	2900	39-40	no	no	0	non-ili
1	2013-10-18	2013-12-19	2	1	3400	39-40	no	no	0	non-ili
2	2014-10-01	2014-12-01	2	1	3010	39-40	no	no	0	non-ili
1	2013-10-05	2013-12-05	2	2	3210	39-40	no	no	0	non-ili
1	2013-10-28	2013-12-27	2	2	3120	39-40	no	no	0	non-ili
2	2014-10-01	2014-11-30	2	1	3110	39-40	no	no	0	non-ili
1	2013-11-01	2013-12-31	2	2	2990	39-40	no	no	0	non-ili
2	2014-10-01	2014-11-29	2	2	3545	39-40	no	no	0	non-ili
2	2014-10-01	2014-11-29	2	2	2930	38-39	no	no	0	non-ili
2	2014-10-01	2014-11-29	2	2	3400	39-40	no	no	0	non-ili
1	2013-11-25	2014-01-23	2	1	3275	38-39	no	no	0	non-ili
1	2013-10-28	2013-12-25	2	2	3595	39-40	no	no	0	non-ili
1	2013-10-18	2013-12-15	2	2	3640	39-40	no	no	0	non-ili
2	2014-10-01	2014-11-27	2	2	2845	39-40	no	no	0	non-ili
2	2014-10-01	2014-11-27	2	1	3890	39-40	no	no	0	non-ili
2	2014-10-01	2014-11-26	3	1	2870	38-39	no	no	0	non-ili
1	2013-10-28	2013-12-23	3	2	3400	39-40	no	no	0	non-ili
1	2013-10-28	2013-12-23	3	1	2875	37-38	no	no	0	non-ili
1	2013-10-18	2013-12-13	3	2	3530	39-40	no	no	0	non-ili
1	2013-10-18	2013-12-13	3	2	3655	39-40	no	no	0	non-ili
1	2013-10-20	2013-12-15	3	2	3200	39-40	no	no	0	non-ili
2	2014-10-01	2014-11-25	3	2	3445	39-40	no	no	0	non-ili
1	2013-10-28	2013-12-22	3	1	3550	39-40	no	no	0	non-ili
1	2013-11-01	2013-12-26	3	2	3080	39-40	no	no	0	non-ili
1	2013-10-18	2013-12-12	3	1	4155	40-41	no	no	0	non-ili
1	2013-10-18	2013-12-12	3	1	3780	39-40	no	no	0	non-ili
1	2013-10-18	2013-12-12	3	2	3645	39-40	no	no	0	non-ili
1	2013-10-18	2013-12-12	3	2	3865	40-41	no	no	0	non-ili
1	2013-10-20	2013-12-14	3	2	2010	37-38	yes	no	0	non-ili
1	2013-10-20	2013-12-14	3	1	3370	39-40	no	no	0	non-ili
1	2013-10-20	2013-12-14	3	1	3300	39-40	no	no	0	non-ili
2	2014-10-01	2014-11-25	3	2	3440	39-40	no	no	0	non-ili
1	2013-10-28	2013-12-21	3	2	3380	39-40	no	yes	1	notTested	2013-12-17	1
1	2013-11-01	2013-12-25	3	1	3555	39-40	no	no	0	non-ili
1	2013-11-01	2013-12-25	3	1	3860	39-40	no	no	0	non-ili
2	2014-10-01	2014-11-24	3	1	3500	39-40	no	no	0	non-ili
1	2013-10-18	2013-12-11	3	1	3200	39-40	no	no	0	non-ili
1	2013-10-20	2013-12-13	3	1	3470	39-40	no	no	0	non-ili
1	2013-10-20	2013-12-13	3	2	3450	39-40	no	no	0	non-ili
2	2014-10-01	2014-11-23	3	2	3200	39-40	no	no	0	non-ili
2	2014-10-01	2014-11-23	3	1	3020	39-40	no	noSari	0
1	2013-10-31	2013-12-23	3	1	3450	39-40	no	noSari	0
1	2013-10-18	2013-12-10	3	1	3340	39-40	no	no	0	non-ili
1	2013-10-18	2013-12-10	3	1	3550	39-40	no	no	0	non-ili
2	2014-10-01	2014-11-22	3	2	4000	39-40	no	no	0	non-ili
1	2013-10-28	2013-12-19	3	2	3850	39-40	no	no	0	non-ili
1	2013-10-18	2013-12-09	3	2	3355	39-40	no	no	0	non-ili
2	2014-10-01	2014-11-22	3	2	3200	39-40	no	no	0	non-ili
2	2014-10-01	2014-11-21	3	1	3850	39-40	no	no	0	non-ili
1	2013-10-28	2013-12-18	3	2	3140	39-40	no	no	0	non-ili
1	2013-10-28	2013-12-18	3	1	3150	39-40	no	no	0	non-ili
1	2013-11-01	2013-12-22	3	1	2820	37-38	no	no	0	non-ili
2	2014-10-01	2014-11-21	3	2	3070	39-40	no	no	0	non-ili
1	2013-10-18	2013-12-08	3	2	3200	39-40	no	no	0	non-ili
1	2013-10-18	2013-12-08	3	2	1950	37-38	yes	no	0	non-ili
2	2014-10-01	2014-11-21	3	1	3770	39-40	no	no	0	non-ili
2	2014-10-01	2014-11-21	3	2	3500	40	no	no	0	non-ili
2	2014-10-01	2014-11-20	3	1	3200	39	no	no	0	non-ili
2	2014-10-01	2014-11-20	3	2	3200	39-40	no	no	0	non-ili
1	2013-10-28	2013-12-17	3	2	3105	39-40	no	no	0	non-ili
1	2013-11-01	2013-12-21	3	2	3150	39-40	no	no	0	non-ili
2	2014-10-01	2014-11-20	3	2	2945	38-39	no	no	0	non-ili
1	2013-10-28	2013-12-16	3	1	4300	40-41	no	no	0	non-ili
1	2013-10-28	2013-12-16	3	1	3250	39-40	no	no	0	non-ili
2	2014-10-01	2014-11-19	3	1	3250	39-40	no	no	0	non-ili
2	2014-10-01	2014-11-18	3	1	3890	39-40	no	no	0	non-ili
1	2013-10-18	2013-12-05	3	2	3430	39-40	no	yes	1	neg	2013-10-18	13
1	2013-10-18	2013-12-05	3	1	4250	40-41	no	no	0	non-ili
1	2013-10-20	2013-11-04	3	2	3700	39-40	no	no	0	non-ili
2	2014-10-01	2014-11-18	3	2	3500	40	no	no	0	non-ili
2	2014-10-01	2014-11-17	3	1	3665	39-40	no	no	0	non-ili
2	2014-10-01	2014-11-17	3	1	3645	39-40	no	no	0	non-ili
1	2013-11-01	2013-12-18	3	2	3305	39-40	no	no	0	non-ili
1	2013-11-01	2013-12-18	3	2	3260	39-40	no	no	0	non-ili
1	2013-10-20	2013-12-06	3	2	3450	39-40	no	yes	1	neg	2013-11-30	10
1	2013-10-11	2013-11-27	3	1	3300	39-40	no	no	0	non-ili
1	2013-10-20	2013-12-05	3	2	2575	37-38	no	no	0	non-ili
1	2013-10-20	2013-12-05	3	2	2825	37-38	no	no	0	non-ili
2	2014-10-01	2014-11-15	3	1	3580	39-40	no	no	0	non-ili
1	2013-10-28	2013-12-12	3	1	4660	40-41	no	yes	1	notTested	2013-12-01	12
1	2013-10-18	2013-12-02	3	2	3415	39-40	no	no	0	non-ili
1	2013-10-18	2013-12-02	3	2	3520	39-40	no	no	0	non-ili
1	2013-10-20	2013-12-04	3	2	4060	40-41	no	no	0	non-ili
2	2014-10-01	2014-11-13	3	2	3400	39-40	no	no	0	non-ili
1	2013-10-20	2013-12-02	3	1	3333	39-40	no	no	0	non-ili
1	2013-10-20	2013-12-02	3	1	3580	39-40	no	no	0	non-ili
2	2014-10-01	2014-11-11	3	2	3350	39-40	no	no	0	non-ili
1	2013-10-18	2013-11-28	3	1	3060	39-40	yes	no	0	non-ili
2	2014-10-01	2014-11-10	3	1	3360	39-40	no	no	0	non-ili
1	2013-10-18	2013-11-27	3	2	3570	39-40	no	no	0	non-ili
1	2013-10-18	2013-11-27	3	1	2550	38-39	no	no	0	non-ili
1	2013-10-18	2013-11-27	3	1	3735	39-40	no	no	0	non-ili
1	2013-10-18	2013-11-27	3	2	3270	39-40	no	no	0	non-ili
1	2013-10-18	2013-11-27	3	1	3130	39-40	no	no	0	non-ili
1	2013-10-20	2013-11-29	3	1	3280	39-40	no	no	0	non-ili
1	2013-10-20	2013-11-29	3	1	3400	39-40	no	no	0	non-ili
1	2013-10-20	2013-11-29	3	2	3985	39-40	no	no	0	non-ili
2	2014-10-01	2014-11-09	3	1	3260	39-40	no	yes	1	notTested	2014-10-09	11
2	2014-10-01	2014-11-09	3	1	3800	39-40	no	no	0	non-ili
1	2013-10-18	2013-11-26	3	1	3290	39-40	no	no	0	non-ili
1	2013-10-18	2013-11-26	3	1	3245	39-40	no	no	0	non-ili
1	2013-10-20	2013-11-28	3	1	3835	40-41	no	no	0	non-ili
1	2013-10-18	2013-11-25	3	1	3305	39-40	no	no	0	non-ili
1	2013-10-18	2013-11-25	3	2	3300	39-40	no	no	0	non-ili
1	2013-10-18	2013-11-25	3	2	3140	39-40	no	no	0	non-ili
1	2013-10-20	2013-11-27	3	1	3525	39-40	no	no	0	non-ili
1	2013-10-20	2013-11-27	3	1	3950	39-40	no	no	0	non-ili
2	2014-10-01	2014-11-08	3	2	3200	39-40	no	no	0	non-ili
2	2014-10-01	2014-11-07	3	1	3480	39-40	no	no	0	non-ili
2	2014-10-01	2014-11-07	3	2	3200	39-40	no	no	0	non-ili
2	2014-10-01	2014-11-07	3	1	3600	39-40	no	no	0	non-ili
2	2014-10-01	2014-11-06	3	1	2730	39-40	no	no	0	non-ili
1	2013-10-18	2013-11-23	3	2	3250	39-40	no	no	0	non-ili
1	2013-10-18	2013-11-23	3	1	3090	39-40	no	no	0	non-ili
1	2013-10-18	2013-11-23	3	2	3150	39-40	no	no	0	non-ili
1	2013-10-20	2013-11-25	3	1	3690	39-40	no	no	0	non-ili
2	2014-10-01	2014-11-05	3	2	3020	39-40	no	no	0	non-ili
1	2013-10-18	2013-11-22	3	1	3053	39-40	no	yes	1	neg	2013-11-21	7
2	2014-10-01	2014-11-04	3	2	2840	39-40	no	no	0	non-ili
1	2013-10-28	2013-12-01	3	2	3780	39-40	no	no	0	non-ili
1	2013-10-18	2013-11-21	3	2	3585	39-40	no	no	0	non-ili
1	2013-10-20	2013-11-23	3	1	3405	39-40	no	no	0	non-ili
1	2013-10-20	2013-11-23	3	1	3250	39-40	no	no	0	non-ili
1	2013-10-18	2013-11-19	3	2	3450	39-40	no	no	0	non-ili
1	2013-10-20	2013-11-21	3	1	3210	39-40	no	no	0	non-ili
1	2013-10-18	2013-11-18	3	2	3050	39-40	no	no	0	non-ili
1	2013-10-18	2013-11-18	3	1	3875	40-41	no	no	0	non-ili
1	2013-10-20	2013-11-20	3	2	3210	39-40	no	yes	1	neg	2013-11-16	10
1	2013-10-18	2013-11-17	3	1	2450	37-38	yes	no	0	non-ili
1	2013-10-20	2013-11-19	3	2	3010	39-40	no	no	0	non-ili
1	2013-10-20	2013-11-19	3	1	3210	39-40	no	no	0	non-ili
2	2014-10-01	2014-10-30	3	1	3940	39-40	no	no	0	non-ili
1	2013-10-20	2013-11-18	3	1	4020	40-41	no	no	0	non-ili
2	2014-10-01	2014-10-29	3	2	3350	39-40	no	no	0	non-ili
2	2014-10-01	2014-10-29	3	1	2830	38-39	no	no	0	non-ili
1	2013-11-04	2013-12-02	3	1	3480	39-40	no	no	0	non-ili
2	2014-10-01	2014-10-28	3	2	3950	39-40	no	no	0	non-ili
2	2014-10-01	2014-10-28	3	1	3200	39-40	no	no	0	non-ili
2	2014-10-01	2014-10-28	3	1	3570	39-40	no	no	0	non-ili
2	2014-10-01	2014-10-28	3	2	3330	39-40	no	no	0	non-ili
1	2013-10-31	2013-11-27	3	1	3610	39-40	no	no	0	non-ili
1	2013-10-20	2013-11-15	3	2	3200	39-40	no	no	0	non-ili
2	2014-10-01	2014-10-26	3	1	3300	39-40	no	no	0	non-ili
2	2014-10-01	2014-10-26	3	1	3550	39-40	no	no	0	non-ili
1	2013-10-20	2013-11-14	3	1	3260	39-40	no	no	0	non-ili
2	2014-10-01	2014-10-25	3	1	3600	39-40	no	yes	1	notTested	2014-10-19	9
1	2013-10-20	2013-11-13	3	1	3060	39-40	no	no	0	non-ili
1	2013-10-20	2013-11-13	3	1	3520	39-40	no	yes	1	neg	2013-10-20	5
1	2013-10-20	2013-11-13	3	1	3670	39-40	no	no	0	non-ili
2	2014-10-01	2014-10-25	3	2	3080	39	no	no	0	non-ili
2	2014-10-01	2014-10-24	3	2	3100	39-40	no	no	0	non-ili
1	2013-10-20	2013-11-12	3	2	3350	39-40	no	no	0	non-ili
1	2013-10-20	2013-11-12	3	1	3460	39-40	no	no	0	non-ili
1	2013-10-20	2013-11-12	3	1	3300	39-40	no	no	0	non-ili
2	2014-10-01	2014-10-24	3	2	2730	38-39	no	no	0	non-ili
2	2014-10-01	2014-10-23	3	1	3650	39-40	no	no	0	non-ili
1	2013-10-20	2013-11-11	3	1	2980	37-38	no	no	0	non-ili
1	2013-10-20	2013-11-11	3	1	3295	39-40	no	no	0	non-ili
2	2014-10-01	2014-10-22	3	1	3840	39-40	no	no	0	non-ili
2	2014-10-01	2014-10-22	3	2	3500	39-40	no	no	0	non-ili
2	2014-10-01	2014-10-22	3	1	3200	39-40	no	no	0	non-ili
1	2013-10-05	2013-10-26	3	2	3370	39-40	no	no	0	non-ili
2	2014-10-01	2014-10-21	3	1	3420	39-40	no	no	0	non-ili
1	2013-10-20	2013-11-09	3	2	2580	37-38	no	no	0	non-ili
1	2013-10-20	2013-11-09	3	2	3295	39-40	no	no	0	non-ili
2	2014-10-01	2014-10-20	3	2	3600	39-40	no	no	0	non-ili
1	2013-10-20	2013-11-08	3	2	3660	39-40	no	no	0	non-ili
2	2014-10-01	2014-10-19	3	2	3350	39-40	no	no	0	non-ili
2	2014-10-01	2014-10-19	3	2	2770	39-40	no	no	0	non-ili
2	2014-10-01	2014-10-18	3	1	2840	39-40	no	no	0	non-ili
2	2014-10-01	2014-10-18	3	1	3140	39-40	no	no	0	non-ili
1	2013-10-20	2013-11-06	3	2	3570	39-40	no	no	0	non-ili
1	2013-10-20	2013-11-06	3	2	3470	39-40	no	no	0	non-ili
1	2013-10-20	2013-11-05	3	2	3125	39-40	no	no	0	non-ili
1	2013-10-20	2013-11-04	3	1	1700	36-37	yes	no	0	non-ili
1	2013-10-20	2013-11-04	3	1	3285	39-40	no	no	0	non-ili
1	2013-10-20	2013-11-04	3	2	3270	39-40	no	no	0	non-ili
1	2013-10-20	2013-11-04	3	2	2950	39-40	no	no	0	non-ili
2	2014-10-01	2014-10-15	3	1	3400	39-40	no	no	0	non-ili
2	2014-10-01	2014-10-15	3	2	3200	39-40	no	no	0	non-ili
2	2014-10-01	2014-10-15	3	1	3250	39-40	no	no	0	non-ili
1	2013-10-20	2013-11-03	3	2	3280	39-40	no	no	0	non-ili
2	2014-10-01	2014-10-14	3	1	3180	39-40	no	no	0	non-ili
2	2014-10-01	2014-10-14	3	2	3610	39-40	no	no	0	non-ili
1	2013-10-20	2013-11-02	3	1	3190	39-40	no	no	0	non-ili
2	2014-10-01	2014-10-13	3	1	3500	39-40	no	no	0	non-ili
1	2013-10-20	2013-11-01	3	1	3415	39-40	no	no	0	non-ili
1	2013-10-20	2013-11-01	3	2	3605	39-40	no	no	0	non-ili
1	2013-10-20	2013-11-01	3	1	3425	39-40	no	no	0	non-ili
1	2013-10-20	2013-10-31	3	2	2465	37-38	no	no	0	non-ili
1	2013-10-20	2013-10-31	3	2	2110	37-38	yes	no	0	non-ili
1	2013-10-20	2013-10-31	3	2	3815	40-41	no	no	0	non-ili
1	2013-10-20	2013-10-31	3	1	3400	39-40	no	no	0	non-ili
1	2013-10-20	2013-10-31	3	1	3145	39-40	no	no	0	non-ili
1	2013-10-20	2013-10-31	3	2	3590	39-40	no	no	0	non-ili
2	2014-10-01	2014-10-11	3	1	3930	39-40	no	no	0	non-ili
2	2014-10-01	2014-10-10	3	2	3230	39-40	no	no	0	non-ili
2	2014-10-01	2014-10-10	3	2	3220	39-40	no	no	0	non-ili
2	2014-10-01	2014-10-09	3	2	3480	39-40	no	no	0	non-ili
2	2014-10-01	2014-10-09	3	2	3210	39-40	no	no	0	non-ili
2	2014-10-01	2014-10-09	3	2	2510	38-39	no	no	0	non-ili
1	2013-10-20	2013-10-28	3	1	2970	39-40	no	no	0	non-ili
1	2013-10-20	2013-10-28	3	1	3615	39-40	no	no	0	non-ili
2	2014-10-01	2014-10-08	3	1	3090	39-40	no	no	0	non-ili
1	2013-10-20	2013-10-27	3	2	2810	39-40	no	no	0	non-ili
1	2013-10-20	2013-10-27	3	2	3820	40-41	no	no	0	non-ili
2	2014-10-01	2014-10-08	3	2	3500	39-40	no	no	0	non-ili
2	2014-10-01	2014-10-07	3	2	2300	36-37	yes	no	0	non-ili
2	2014-10-01	2014-10-07	3	1	2200	39-40	yes	no	0	non-ili
2	2014-10-01	2014-10-07	3	1	3400	39-40	no	no	0	non-ili
2	2014-10-01	2014-10-07	3	2	3650	39-40	no	no	0	non-ili
2	2014-10-01	2014-10-07	3	1	3400	40	no	no	0	non-ili
1	2013-10-05	2013-10-11	3	2	3100	39-40	no	no	0	non-ili
2	2014-10-01	2014-10-06	3	2	2880	38-39	no	no	0	non-ili
2	2014-10-01	2014-10-06	3	2	3020	39-40	no	no	0	non-ili
2	2014-10-01	2014-10-06	3	2	3020	39-40	no	no	0	non-ili
2	2014-10-01	2014-10-06	3	2	3290	39-40	no	no	0	non-ili
1	2013-10-20	2013-10-25	3	1	3670	39-40	no	no	0	non-ili
1	2013-10-20	2013-10-24	3	1	3205	39-40	no	no	0	non-ili
1	2013-10-20	2013-10-24	3	2	2645	37-38	no	no	0	non-ili
2	2014-10-02	2014-10-06	3	1	2000	36-37	yes	no	0	non-ili
1	2013-10-20	2013-10-23	3	2	3350	39-40	no	no	0	non-ili
2	2014-10-01	2014-10-03	3	2	2490	38-39	yes	no	0	non-ili
2	2014-10-01	2014-10-03	3	2	3000	39-40	no	no	0	non-ili
2	2014-10-01	2014-10-03	3	1	2740	38-39	no	no	0	non-ili
1	2013-10-20	2013-10-22	3	2	3210	39-40	no	no	0	non-ili
1	2013-10-20	2013-10-22	3	1	3550	39-40	no	no	0	non-ili
1	2013-10-20	2013-10-22	3	2	3100	39-40	no	no	0	non-ili
1	2013-10-20	2013-10-22	3	1	3345	39-40	no	no	0	non-ili
2	2014-10-01	2014-10-02	3	1	2550	39	no	no	0	non-ili
1	2013-10-20	2013-10-21	3	1	3670	39-40	no	no	0	non-ili
1	2013-10-20	2013-10-21	3	2	3200	39-40	no	no	0	non-ili
1	2013-10-20	2013-10-21	3	2	3670	39-40	no	no	0	non-ili

## Sheet: Infant_sari
season	EnrolD	LeaveD	AgeEnrolGp	Gender	BirthWt	GestAgeDel	MedCondBirth	InfectionOrder	Result	SympD	AdmitD	DischargeD
2	2015-02-17	2015-04-30	1	1	3040	39	1	1	notTested	2015-03-26	2015-03-31	2015-04-08
2	2015-01-14	2015-04-30	1	1	3200	40	1	1	notTested	2015-03-01	2015-03-07	2015-03-17
2	2014-11-18	2015-04-30	1	1	2850	39	1	1	notTested	2015-04-02	2015-04-04	2015-04-14
1	2013-11-01	2013-11-08	1	2	3210	39-40	1	0	non-sari
2	2014-09-28	2015-03-15	1	1	3200	40	1	0	non-sari
2	2014-12-12	2015-04-30	1	1	3300	39-40	1	0	non-sari
2	2015-02-14	2015-04-30	1	2	2915	39	1	0	non-sari
2	2015-02-14	2015-04-30	1	2	2900	39	1	0	non-sari
2	2015-02-16	2015-04-30	1	2	3660	39-40	1	0	non-sari
2	2015-03-05	2015-04-30	1	1	3200	39-40	1	0	non-sari
2	2015-03-04	2015-04-30	1	2	3825	40	1	0	non-sari
1	2014-03-15	2014-04-30	1	2	3790	39-40	1	0	non-sari
2	2015-02-03	2015-04-30	1	2	3660	40	1	0	non-sari
2	2014-12-11	2015-04-30	1	2	3080	39-40	1	0	non-sari
2	2015-04-05	2015-04-30	1	2	3600	39-40	1	0	non-sari
2	2015-04-02	2015-04-30	1	2	3336	39-40	1	0	non-sari
2	2015-03-03	2015-04-30	1	1	3410	39-40	1	0	non-sari
2	2015-03-16	2015-04-30	1	2	2790	38-39	1	0	non-sari
2	2015-04-02	2015-04-30	1	2	3570	40	1	0	non-sari
2	2015-03-26	2015-04-30	1	1	3000	39-40	1	0	non-sari
2	2015-03-30	2015-04-30	1	2	2600	39	1	0	non-sari
2	2015-03-31	2015-04-30	1	2	3400	39-40	1	0	non-sari
2	2015-02-20	2015-04-30	1	1	3400	39-40	1	0	non-sari
1	2013-12-03	2014-04-30	1	1	4210	39-40	1	1	notTested	2014-01-02	2014-01-04	2014-01-13
1	2014-01-14	2014-04-30	1	1	3088	38-39	1	0	non-sari
1	2013-10-01	2014-03-17	1	2	3310	39-40	1	0	non-sari
2	2014-11-05	2015-04-20	1	2	3200	39-40	1	1	notTested	2014-11-17	2014-11-21	2014-11-26
2	2014-10-18	2015-04-02	1	1	3200	39-40	1	1	neg	2014-11-22	2014-11-25	2014-12-01
2	2014-10-01	2015-03-16	1	1	3060	39-40	1	1	neg	2014-11-07	2014-11-15	2014-11-21
1	2013-12-21	2014-04-30	1	1	3600	39-40	1	1	notTested	2014-01-29	2014-02-10	2014-02-10
2	2014-10-18	2015-04-02	1	1	3200	39-40	1	2	notTested	2014-12-06	2014-12-09	2014-12-18
1	2013-12-21	2014-04-30	1	1	3600	39-40	1	2	notTested	2014-02-14	2014-02-15	2014-02-22
2	2014-10-18	2015-04-02	1	1	3200	39-40	1	3	neg	2015-03-10	2015-03-23	2015-03-28
2	2014-10-01	2015-03-16	1	1	3060	39-40	1	2	neg	2015-03-06	2015-03-09	2015-03-17
1	2013-11-18	2014-04-30	1	1	3585	39-40	1	0	non-sari
2	2014-10-01	2015-03-16	1	2	3630	39-40	1	0	non-sari
2	2014-12-03	2015-04-30	1	1	3480	39-40	1	0	non-sari
1	2014-01-02	2014-04-30	1	2	3425	39-40	1	0	non-sari
1	2014-01-25	2014-04-30	1	2	3450	39-40	1	0	non-sari
1	2014-02-18	2014-04-30	1	2	4240	39-40	1	0	non-sari
1	2013-10-05	2014-03-20	1	2	3410	39-40	1	0	non-sari
2	2015-03-02	2015-04-30	1	1	3290	39-40	1	0	non-sari
2	2015-01-02	2015-04-30	1	1	3520	39-40	1	0	non-sari
2	2015-04-15	2015-04-30	1	2	2500	39	1	0	non-sari
2	2015-01-08	2015-04-30	1	2	3320	39-40	1	1	neg	2015-01-23	2015-01-26	2015-02-03
1	2014-01-25	2014-04-30	1	1	2850	38-39	1	1	notTested	2014-02-11	2014-02-11	2014-02-20
2	2014-10-26	2015-04-09	1	2	3280	39-40	1	1	notTested	2014-11-13	2014-11-14	2014-11-21
1	2013-11-22	2014-04-30	1	1	3450	39-40	1	1	neg	2013-12-18	2013-12-22	2014-01-03
1	2014-02-24	2014-04-30	1	1	4200	39-40	1	1	notTested	2014-03-24	2014-03-30	2014-04-04
1	2014-03-01	2014-04-30	1	1	3310	39-40	1	1	notTested	2014-04-12	2014-04-13	2014-04-21
1	2013-10-22	2014-04-05	1	1	3270	39-40	1	1	notTested	2013-12-09	2013-12-11	2013-12-17
1	2013-12-02	2014-04-30	1	2	3700	39-40	1	1	notTested	2014-01-20	2014-01-21	2014-02-02
1	2014-01-24	2014-04-30	1	2	3250	39-40	1	1	notTested	2014-04-01	2014-04-03	2014-04-10
1	2013-11-22	2014-04-30	1	1	3450	39-40	1	2	notTested	2014-01-30	2014-02-01	2014-02-12
1	2013-11-22	2014-04-30	1	1	3450	39-40	1	3	notTested	2014-02-13	2014-02-16	2014-02-23
1	2013-12-03	2014-04-30	1	2	3240	38-39	1	1	notTested	2014-03-08	2014-03-10	2014-03-17
2	2014-11-08	2015-04-22	1	1	3400	40	1	1	neg	2015-03-01	2015-03-01	2015-03-10
1	2013-10-02	2014-03-16	1	1	3600	39-40	1	1	notTested	2014-03-03	2014-03-10	2014-03-17
1	2013-10-29	2014-04-12	1	1	3160	37-38	1	0	non-sari
1	2013-10-29	2014-04-12	1	1	2800	37-38	1	0	non-sari
1	2013-10-09	2014-03-23	1	2	3350	39-40	1	0	non-sari
1	2013-10-09	2014-03-23	1	2	3365	39-40	1	0	non-sari
1	2013-10-07	2014-03-21	1	1	3830	40-41	1	0	non-sari
2	2014-10-10	2015-03-24	1	2	3280	39	1	0	non-sari
1	2013-11-11	2014-04-25	1	2	2365	37-38	3	0	non-sari
2	2014-10-15	2015-03-29	1	1	3560	39-40	1	0	non-sari
1	2013-11-11	2014-04-25	1	2	3175	38-39	1	0	non-sari
1	2013-10-07	2014-03-21	1	2	3330	39-40	1	0	non-sari
1	2013-11-12	2014-04-26	1	1	3260	39-40	1	0	non-sari
2	2014-11-07	2015-04-21	1	2	2800	39	1	0	non-sari
2	2014-10-08	2015-03-22	1	1	3010	39-40	1	0	non-sari
1	2013-11-11	2014-04-25	1	1	3330	39-40	1	0	non-sari
2	2014-10-20	2015-04-03	1	2	3400	39-40	1	0	non-sari
1	2013-11-04	2014-04-18	1	2	3500	40-41	1	0	non-sari
2	2014-11-20	2015-04-30	1	2	3400	39-40	1	0	non-sari
2	2014-10-28	2015-04-11	1	1	3245	39	1	0	non-sari
2	2014-11-03	2015-04-17	1	1	3790	40	1	0	non-sari
2	2014-11-14	2015-04-28	1	1	3400	39-40	1	0	non-sari
2	2014-12-04	2015-04-30	1	2	3020	39	1	0	non-sari
2	2014-11-08	2015-04-22	1	1	3410	39-40	1	0	non-sari
2	2014-12-01	2015-04-30	1	1	3300	39-40	1	0	non-sari
1	2014-01-02	2014-04-30	1	2	3120	38-39	1	0	non-sari
1	2013-12-15	2014-04-30	1	2	3850	39-40	1	0	non-sari
1	2014-01-06	2014-04-30	1	2	2900	38-39	1	0	non-sari
1	2014-01-02	2014-04-30	1	1	3270	39-40	1	0	non-sari
1	2014-01-02	2014-04-30	1	1	4035	39-40	1	0	non-sari
1	2014-01-02	2014-04-30	1	2	2200	38-39	3	0	non-sari
2	2014-12-16	2015-04-30	1	1	3575	40	1	0	non-sari
1	2014-01-12	2014-04-30	1	1	3300	39-40	1	0	non-sari
2	2014-12-15	2015-04-30	1	1	3005	40	1	0	non-sari
2	2014-12-25	2015-04-30	1	2	3505	39-40	1	0	non-sari
2	2014-12-15	2015-04-30	1	1	3540	39-40	1	0	non-sari
1	2014-01-28	2014-04-30	1	1	3700	39-40	1	0	non-sari
1	2014-01-28	2014-04-30	1	2	2810	38-39	1	0	non-sari
1	2014-01-20	2014-04-30	1	1	3550	39-40	1	0	non-sari
1	2014-01-25	2014-04-30	1	1	3695	39-40	1	0	non-sari
1	2014-01-25	2014-04-30	1	1	3290	39-40	1	0	non-sari
1	2014-01-16	2014-04-30	1	1	3130	39-40	1	0	non-sari
1	2014-01-12	2014-04-30	1	1	3210	39-40	1	0	non-sari
1	2014-02-07	2014-04-30	1	1	3300	39-40	1	0	non-sari
1	2014-02-02	2014-04-30	1	1	3510	39-40	1	0	non-sari
1	2014-02-23	2014-04-30	1	1	3230	39-40	1	0	non-sari
1	2014-03-02	2014-04-30	1	1	4240	39-40	1	0	non-sari
2	2015-01-16	2015-04-30	1	2	3300	39-40	1	0	non-sari
1	2014-02-27	2014-04-30	1	1	3200	39-40	1	0	non-sari
2	2015-03-10	2015-04-30	1	1	2820	39	1	0	non-sari
1	2014-03-02	2014-04-30	1	1	2500	38-39	1	0	non-sari
2	2015-02-20	2015-04-30	1	1	3950	40	1	0	non-sari
1	2014-02-24	2014-04-30	1	1	3280	39-40	1	0	non-sari
2	2015-03-02	2015-04-30	1	1	3500	39-40	1	0	non-sari
1	2014-03-07	2014-04-30	1	1	3300	39-40	1	0	non-sari
1	2014-03-15	2014-04-30	1	1	3600	39-40	1	0	non-sari
1	2014-03-20	2014-04-30	1	1	2900	38-39	1	0	non-sari
2	2015-03-13	2015-04-30	1	1	3300	40	1	0	non-sari
2	2015-01-05	2015-04-30	1	1	3040	39	1	0	non-sari
2	2015-02-07	2015-04-30	1	2	3300	39	1	0	non-sari
2	2015-02-17	2015-04-30	1	2	3390	39-40	1	0	non-sari
2	2015-03-09	2015-04-30	1	2	3400	39	1	0	non-sari
1	2014-03-19	2014-04-30	1	2	3020	39-40	1	0	non-sari
1	2014-02-12	2014-04-30	1	1	3290	39-40	1	0	non-sari
2	2015-02-16	2015-04-30	1	2	3300	39-40	1	0	non-sari
1	2014-03-01	2014-04-30	1	1	3100	39-40	1	0	non-sari
1	2014-02-10	2014-04-30	1	1	3240	39-40	1	0	non-sari
2	2015-02-26	2015-04-30	1	2	3730	40	1	0	non-sari
2	2015-03-06	2015-04-30	1	1	3650	40	1	0	non-sari
2	2015-03-11	2015-04-30	1	1	3305	39-40	1	0	non-sari
2	2014-12-26	2015-04-30	1	1	3490	39-40	1	0	non-sari
2	2015-03-14	2015-04-30	1	2	3800	40	1	0	non-sari
2	2015-02-28	2015-04-30	1	2	4000	40	2	0	non-sari
2	2015-01-16	2015-04-30	1	2	3300	39	1	0	non-sari
2	2015-04-13	2015-04-30	1	2	3380	39	1	0	non-sari
2	2015-03-16	2015-04-30	1	2	3400	39-40	1	0	non-sari
2	2015-04-10	2015-04-30	1	1	3300	40	1	0	non-sari
2	2015-04-21	2015-04-30	1	2	3480	39-40	1	0	non-sari
2	2014-11-16	2015-04-30	1	1	3500	40	1	0	non-sari
1	2013-12-16	2014-04-30	1	2	3180	38-39	1	1	neg	2013-12-25	2014-01-01	2014-01-10
2	2014-12-30	2015-04-30	1	1	4200	41	1	1	notTested	2015-01-16	2015-01-21	2015-01-30
2	2014-11-27	2015-04-30	1	1	3535	39-40	1	1	neg	2014-12-20	2014-12-27	2015-01-09
1	2013-12-30	2014-04-30	1	2	3280	39-40	1	1	notTested	2014-01-29	2014-02-02	2014-02-10
1	2014-03-20	2014-04-30	1	1	3200	39-40	1	1	notTested	2014-04-19	2014-04-28	2014-05-03
1	2013-12-17	2014-04-30	1	1	3680	39-40	1	1	notTested	2014-01-17	2014-01-22	2014-02-02
2	2014-10-10	2015-03-23	1	1	3400	39-40	1	1	rsv	2014-11-14	2014-11-15	2014-12-01
1	2013-11-05	2014-04-18	1	1	3530	39-40	1	1	neg	2013-12-15	2013-12-21	2013-12-31
1	2013-11-05	2014-04-18	1	2	3400	39-40	1	1	notTested	2013-12-16	2013-12-16	2014-01-13
2	2015-01-02	2015-04-30	1	1	3270	39	1	1	notTested	2015-02-14	2015-02-15	2015-02-24
2	2015-01-24	2015-04-30	1	1	2665	39-40	1	1	notTested	2015-03-11	2015-03-13	2015-03-25
2	2014-11-01	2015-04-14	1	2	2835	39-40	1	1	notTested	2014-12-18	2014-12-20	2014-12-31
2	2015-02-17	2015-04-30	1	1	3400	39-40	2	1	notTested	2015-04-05	2015-04-07	2015-04-13
2	2015-02-03	2015-04-30	1	2	2780	39	1	1	notTested	2015-03-23	2015-03-23	2015-04-11
2	2015-01-20	2015-04-30	1	1	4050	40	1	1	notTested	2015-03-10	2015-03-12	2015-03-17
2	2015-01-13	2015-04-30	1	1	3200	39-40	1	1	notTested	2015-03-05	2015-03-05	2015-03-13
1	2013-11-05	2014-04-18	1	2	3250	39-40	1	1	notTested	2014-01-08	2014-01-12	2014-01-22
2	2015-01-20	2015-04-30	1	1	3160	39-40	1	1	notTested	2015-03-25	2015-03-30	2015-04-17
1	2013-11-20	2014-04-30	1	2	3210	39-40	1	1	notTested	2014-01-28	2014-01-28	2014-02-03
2	2015-01-21	2015-04-30	1	1	3490	40	1	1	notTested	2015-04-01	2015-04-01	2015-04-06
1	2013-12-24	2014-04-30	1	2	2920	38-39	1	1	neg	2014-03-09	2014-03-10	2014-03-17
2	2014-09-05	2015-02-16	1	2	3200	39-40	1	1	neg	2014-11-25	2014-11-27	2014-12-04
1	2013-11-21	2014-04-30	1	1	3330	39-40	1	1	notTested	2014-02-15	2014-02-16	2014-02-24
1	2013-11-18	2014-04-30	1	1	3790	40-41	1	1	notTested	2014-03-05	2014-03-08	2014-03-17
2	2014-12-10	2015-04-30	1	2	3170	39-40	1	1	notTested	2015-03-27	2015-03-27	2015-04-01
1	2013-10-11	2014-03-24	1	2	3200	37-38	1	1	rsv	2014-01-26	2014-02-01	2014-02-07
2	2014-11-01	2015-04-14	1	2	2835	39-40	1	2	neg	2015-02-28	2015-03-02	2015-03-09
1	2013-11-07	2014-04-20	1	1	2980	38-39	1	1	notTested	2014-03-08	2014-03-12	2014-03-24
1	2013-11-07	2014-04-20	1	1	2980	38-39	1	2	notTested	2014-04-01	2014-04-21	2014-04-28
2	2014-10-10	2015-03-23	1	1	3400	39-40	1	2	neg	2015-03-22	2015-03-28	2015-04-13
1	2013-10-11	2014-03-24	1	1	3490	39-40	1	0	non-sari
1	2013-10-28	2014-04-10	1	2	3965	39-40	1	0	non-sari
1	2013-10-08	2014-03-21	1	1	3130	37-38	1	0	non-sari
1	2013-10-28	2014-04-10	1	1	3820	39-40	1	0	non-sari
1	2013-10-29	2014-04-11	1	2	3170	38-39	1	0	non-sari
1	2013-10-29	2014-04-11	1	2	3840	39-40	1	0	non-sari
1	2013-10-29	2014-04-11	1	1	3470	39-40	1	0	non-sari
2	2015-01-04	2015-04-30	1	1	3290	39-40	1	0	non-sari
2	2014-10-10	2015-03-23	1	2	4625	39-40	1	0	non-sari
2	2014-10-20	2015-04-02	1	2	3130	39-40	1	0	non-sari
2	2014-10-10	2015-03-23	1	2	3280	39-40	1	0	non-sari
1	2013-11-11	2014-04-24	1	1	3450	39-40	1	0	non-sari
1	2013-11-05	2014-04-18	1	1	3310	39-40	1	0	non-sari
2	2014-10-15	2015-03-28	1	1	3630	39-40	1	0	non-sari
1	2013-10-11	2014-03-24	1	1	3430	39-40	1	0	non-sari
2	2014-10-13	2015-03-26	1	1	3485	39-40	1	0	non-sari
2	2014-10-24	2015-04-06	1	1	4100	39-40	1	0	non-sari
1	2013-11-11	2014-04-24	1	1	3560	39-40	1	0	non-sari
1	2013-11-12	2014-04-25	1	2	3055	39-40	1	0	non-sari
2	2014-11-01	2015-04-14	1	2	3600	39-40	1	0	non-sari
1	2013-11-25	2014-04-30	1	1	3185	39-40	1	0	non-sari
2	2014-10-23	2014-11-24	1	1	3280	39	1	0	non-sari
1	2013-11-05	2014-04-18	1	1	2450	37-38	3	0	non-sari
1	2013-11-09	2013-12-03	1	2	3425	39-40	1	0	non-sari
1	2013-11-11	2014-04-24	1	1	3119	38-39	1	0	non-sari
2	2014-11-02	2015-04-15	1	2	3430	39	1	0	non-sari
2	2014-10-21	2015-04-03	1	1	3600	39	1	0	non-sari
2	2014-11-03	2015-04-16	1	1	3840	39-40	1	0	non-sari
2	2014-11-14	2015-04-27	1	2	3710	39	1	0	non-sari
2	2014-11-18	2015-04-30	1	2	3970	39-40	1	0	non-sari
2	2014-11-24	2015-04-30	1	2	3100	39-40	1	0	non-sari
2	2014-11-16	2015-04-29	1	1	3500	39	1	0	non-sari
1	2013-11-19	2014-04-30	1	2	3315	39-40	1	0	non-sari
1	2013-12-09	2014-04-30	1	1	3375	39-40	1	0	non-sari
2	2014-11-21	2015-04-30	1	1	4450	40	1	0	non-sari
1	2013-12-13	2014-04-30	1	1	3270	39-40	1	0	non-sari
1	2013-12-09	2014-04-30	1	1	3490	39-40	1	0	non-sari
1	2014-01-03	2014-04-30	1	2	3535	39-40	1	0	non-sari
2	2014-12-02	2015-04-30	1	1	3035	39	1	0	non-sari
2	2014-11-28	2015-04-30	1	2	3700	40	1	0	non-sari
2	2014-12-15	2015-04-30	1	2	3200	39	1	0	non-sari
2	2014-12-10	2015-04-30	1	2	3280	39	1	0	non-sari
1	2013-12-30	2014-04-30	1	1	3530	39-40	1	0	non-sari
2	2015-01-05	2015-04-30	1	1	3200	39	1	0	non-sari
1	2014-01-09	2014-04-30	1	1	3715	39-40	1	0	non-sari
1	2014-01-09	2014-04-30	1	2	3460	38-39	1	0	non-sari
1	2013-12-30	2014-04-30	1	2	3260	38-39	1	0	non-sari
1	2014-01-12	2014-04-30	1	2	3300	39-40	1	0	non-sari
1	2014-01-08	2014-04-30	1	1	3485	39-40	1	0	non-sari
2	2014-12-23	2015-04-30	1	2	3605	39-40	1	0	non-sari
1	2014-01-27	2014-04-30	1	2	3300	39-40	1	0	non-sari
1	2014-01-28	2014-04-30	1	1	2900	38-39	1	0	non-sari
1	2014-01-21	2014-04-30	1	1	2705	37-38	1	0	non-sari
1	2014-01-28	2014-04-30	1	1	3150	38-39	1	0	non-sari
1	2014-01-17	2014-04-30	1	2	3455	38-39	1	0	non-sari
2	2014-11-16	2015-04-29	1	2	3290	39-40	1	0	non-sari
2	2014-11-20	2015-04-30	1	2	3500	39-40	1	0	non-sari
1	2013-12-03	2014-04-30	1	1	3460	39-40	1	0	non-sari
2	2015-02-05	2015-04-30	1	1	3240	39-40	1	0	non-sari
2	2014-09-20	2015-03-03	1	1	3200	39-40	1	0	non-sari
2	2015-01-17	2015-04-30	1	2	3300	39-40	1	0	non-sari
1	2014-01-25	2014-04-30	1	1	3150	38-39	1	0	non-sari
1	2014-02-18	2014-04-30	1	1	3355	39-40	1	0	non-sari
1	2014-03-11	2014-04-30	1	1	3160	39-40	1	0	non-sari
1	2014-02-11	2014-04-30	1	1	3340	39-40	1	0	non-sari
2	2015-01-14	2015-04-30	1	2	3465	39-40	1	0	non-sari
1	2014-03-09	2014-04-30	1	1	3550	39-40	1	0	non-sari
2	2015-02-15	2015-04-30	1	2	3150	40	1	0	non-sari
2	2015-02-27	2015-04-30	1	1	3560	39-40	1	0	non-sari
2	2015-03-09	2015-04-30	1	2	3100	39-40	1	0	non-sari
1	2014-02-28	2014-04-30	1	1	3200	39-40	1	0	non-sari
2	2015-02-02	2015-04-30	1	2	3670	40	1	0	non-sari
2	2015-02-10	2015-04-30	1	1	2905	39	1	0	non-sari
1	2013-11-05	2014-04-18	1	1	3300	39-40	1	0	non-sari
2	2015-01-16	2015-04-30	1	1	3400	39-40	1	0	non-sari
1	2014-04-10	2014-04-30	1	1	3010	39-40	1	0	non-sari
1	2014-04-20	2014-04-30	1	1	3240	39-40	1	0	non-sari
1	2014-03-25	2014-04-30	1	1	3370	39-40	1	0	non-sari
2	2015-03-20	2015-04-30	1	2	3600	39-40	1	0	non-sari
2	2015-01-28	2015-04-30	1	1	3665	39-40	1	0	non-sari
1	2014-03-27	2014-04-30	1	2	3290	39-40	1	0	non-sari
2	2015-02-03	2015-04-30	1	1	3260	39-40	1	0	non-sari
1	2014-04-13	2014-04-30	1	1	3810	39-40	1	0	non-sari
1	2014-04-20	2014-04-30	1	1	3700	39-40	1	0	non-sari
2	2015-02-21	2015-04-30	1	2	2715	39-40	1	0	non-sari
2	2015-01-05	2015-04-30	1	1	4090	40	1	0	non-sari
2	2015-01-23	2015-04-30	1	2	3590	39	1	0	non-sari
1	2014-03-01	2014-04-30	1	1	3600	39-40	1	0	non-sari
2	2015-02-13	2015-04-30	1	2	2960	39	1	0	non-sari
2	2015-02-14	2015-04-30	1	1	3035	39	1	0	non-sari
2	2015-03-04	2015-04-30	1	1	3275	39-40	1	0	non-sari
2	2015-01-27	2015-04-30	1	1	2980	39	1	0	non-sari
2	2015-01-27	2015-04-30	1	1	3480	39-40	1	0	non-sari
2	2015-01-25	2015-04-30	1	1	3655	39	1	0	non-sari
2	2015-01-28	2015-04-30	1	1	3600	39-40	1	0	non-sari
2	2015-02-14	2015-04-30	1	1	3340	40-41	1	0	non-sari
2	2015-03-16	2015-04-30	1	1	3510	40	1	0	non-sari
2	2015-01-20	2015-04-30	1	1	3300	39	1	0	non-sari
2	2015-02-10	2015-04-30	1	1	3000	39	1	0	non-sari
2	2015-01-12	2015-04-30	1	2	3090	39	1	0	non-sari
2	2015-04-10	2015-04-30	1	2	3340	40	1	0	non-sari
2	2015-03-19	2015-04-30	1	2	3700	39	1	0	non-sari
2	2015-03-07	2015-04-30	1	1	3400	40	1	0	non-sari
2	2015-03-14	2015-04-30	1	1	3410	39	1	0	non-sari
2	2015-03-09	2015-04-30	1	1	3300	39	1	0	non-sari
2	2015-03-17	2015-04-30	1	2	3400	39	1	0	non-sari
2	2015-03-10	2015-04-30	1	1	3400	39-40	1	0	non-sari
2	2015-03-07	2015-04-30	1	1	3200	39-40	1	0	non-sari
2	2015-03-10	2015-04-30	1	2	3490	39	1	0	non-sari
2	2015-03-17	2015-04-30	1	2	3400	39	1	0	non-sari
2	2015-03-23	2015-04-30	1	2	3500	39-40	1	0	non-sari
2	2015-04-21	2015-04-30	1	2	3700	40-41	1	0	non-sari
2	2015-04-12	2015-04-30	1	2	3100	40-41	1	0	non-sari
2	2015-04-17	2015-04-30	1	2	3800	39-40	1	0	non-sari
2	2014-11-20	2015-04-30	1	2	3260	39	1	0	non-sari
2	2014-11-28	2015-04-30	1	2	3900	39-40	1	0	non-sari
2	2014-11-10	2015-04-23	1	2	2880	40	1	0	non-sari
2	2014-11-03	2015-04-16	1	2	3200	39	1	0	non-sari
2	2014-11-27	2015-04-30	1	1	3400	39-40	1	0	non-sari
2	2014-12-02	2015-04-30	1	1	3300	39-40	1	0	non-sari
2	2015-04-20	2015-04-30	1	1	3200	39-40	1	0	non-sari
2	2015-04-22	2015-04-30	1	1	3300	39-40	1	0	non-sari
2	2015-04-17	2015-04-30	1	1	3200	39-40	1	0	non-sari
2	2015-03-07	2015-04-30	1	2	3290	39-40	1	0	non-sari
2	2015-01-24	2015-04-30	1	1	3300	39-40	1	1	notTested	2015-01-28	2015-02-04	2015-02-16
1	2013-11-19	2014-04-30	1	2	3410	39-40	1	1	notTested	2013-11-29	2013-12-11	2013-12-17
1	2013-12-30	2014-04-30	1	1	3361	39-40	1	1	notTested	2014-01-11	2014-01-15	2014-01-22
1	2014-01-17	2014-04-30	1	1	3460	39-40	1	1	notTested	2014-01-29	2014-01-29	2014-02-06
2	2014-12-30	2015-04-30	1	1	3200	39	1	1	neg	2015-01-14	2015-01-15	2015-01-23
1	2013-12-10	2014-04-30	1	1	3870	39-40	1	1	notTested	2014-01-01	2014-01-08	2014-01-20
2	2014-11-08	2015-04-20	1	1	3050	39	1	1	notTested	2014-12-02	2014-12-05	2014-12-22
2	2015-02-28	2015-04-30	1	2	3290	40	1	1	neg	2015-03-26	2015-03-31	2015-04-13
2	2014-10-26	2015-04-07	1	2	3280	39-40	1	1	rsv	2014-12-03	2014-12-05	2014-12-19
2	2014-11-02	2015-04-14	1	2	3545	39-40	1	1	notTested	2014-12-01	2014-12-07	2014-12-15
2	2014-10-04	2015-03-16	1	2	3200	39-40	1	1	notTested	2014-11-11	2014-11-11	2014-11-17
1	2013-11-01	2014-04-13	1	2	3315	39-40	1	1	notTested	2013-12-10	2013-12-12	2013-12-20
1	2014-02-27	2014-04-30	1	1	3100	39-40	1	1	notTested	2014-04-11	2014-04-14	2014-04-21
1	2014-02-10	2014-04-30	1	1	3455	39-40	1	1	A	2014-04-02	2014-04-03	2014-04-11
2	2014-10-20	2015-04-01	1	1	3400	39-40	1	1	rsv	2014-12-17	2014-12-21	2014-12-26
1	2013-10-28	2014-04-09	1	2	2930	37-38	1	1	notTested	2014-01-02	2014-01-02	2014-01-07
1	2013-11-25	2014-04-30	1	2	3995	39-40	1	1	notTested	2014-02-01	2014-02-06	2014-02-12
1	2014-01-06	2014-04-30	1	1	3290	38-39	1	1	notTested	2014-03-21	2014-03-22	2014-04-07
2	2014-10-04	2015-03-16	1	2	3200	39-40	1	2	neg	2015-01-08	2015-01-08	2015-01-10
1	2013-11-19	2014-04-30	1	1	3440	39-40	1	1	rsv	2014-02-24	2014-02-24	2014-03-07
2	2014-09-10	2015-02-20	1	2	3400	39	1	1	neg	2014-12-29	2015-01-03	2015-01-12
1	2013-09-17	2014-02-27	1	2	3100	39-40	1	1	notTested	2014-01-18	2014-01-22	2014-01-30
2	2014-10-20	2015-04-01	1	1	3500	39-40	1	1	neg	2015-03-15	2015-03-15	2015-03-23
2	2014-10-20	2015-04-01	1	1	3400	39-40	1	2	notTested	2015-03-23	2015-03-27	2015-04-06
1	2013-11-04	2014-04-16	1	1	3340	40	1	0	non-sari
1	2013-11-02	2014-04-14	1	2	2630	37-38	1	0	non-sari
1	2013-11-01	2014-04-13	1	1	2850	37-38	1	0	non-sari
1	2013-10-19	2014-03-31	1	1	2710	37-38	1	0	non-sari
2	2014-10-20	2015-04-01	1	2	2930	39	1	0	non-sari
2	2014-10-22	2015-04-03	1	2	3615	39-40	1	0	non-sari
2	2014-11-01	2015-04-13	1	1	3350	39-40	1	0	non-sari
2	2014-10-20	2015-04-01	1	1	3600	39-40	1	0	non-sari
2	2014-11-03	2015-04-15	1	1	3400	39-40	1	0	non-sari
1	2013-11-08	2014-04-20	1	1	3145	38-39	1	0	non-sari
2	2014-11-01	2015-04-13	1	2	3400	39	1	0	non-sari
1	2013-11-25	2014-04-30	1	2	3250	39-40	1	0	non-sari
2	2014-11-10	2015-04-22	1	2	3190	39	1	0	non-sari
1	2013-11-15	2014-04-27	1	1	3065	39-40	1	0	non-sari
1	2013-11-23	2014-04-30	1	2	3200	39-40	1	0	non-sari
1	2013-11-23	2014-04-30	1	1	2700	38-39	1	0	non-sari
1	2013-12-03	2014-04-30	1	2	3520	39-40	1	0	non-sari
2	2014-11-14	2015-04-26	1	2	3200	39	1	0	non-sari
2	2014-10-20	2015-04-01	1	2	4350	40	1	0	non-sari
1	2013-11-27	2014-04-30	1	2	3010	39-40	1	0	non-sari
1	2013-12-10	2014-04-30	1	1	3480	39-40	1	0	non-sari
2	2014-11-27	2015-04-30	1	1	3500	40	1	0	non-sari
1	2013-12-10	2014-04-30	1	1	3510	39-40	1	0	non-sari
2	2014-11-23	2015-04-30	1	2	3200	39	1	0	non-sari
2	2014-12-10	2015-04-30	1	2	3370	39	1	0	non-sari
1	2013-12-03	2014-04-30	1	1	3925	39-40	1	0	non-sari
1	2013-12-30	2014-04-30	1	1	3500	39-40	1	0	non-sari
2	2014-12-17	2015-04-30	1	1	3400	39-40	1	0	non-sari
1	2013-12-13	2014-04-30	1	1	3225	39-40	1	0	non-sari
1	2013-12-12	2014-04-30	1	1	3075	39-40	1	0	non-sari
2	2014-12-19	2015-04-30	1	1	2760	39	1	0	non-sari
2	2015-01-06	2015-04-30	1	2	3925	40	1	0	non-sari
1	2014-01-02	2014-04-30	1	2	3035	39-40	1	0	non-sari
2	2014-12-10	2015-04-30	1	2	4175	40	1	0	non-sari
2	2014-12-13	2015-04-30	1	1	3400	39-40	1	0	non-sari
1	2014-01-12	2014-04-30	1	2	3180	38-39	1	0	non-sari
1	2014-01-02	2014-04-30	1	1	3675	39-40	1	0	non-sari
1	2014-01-08	2014-04-30	1	1	3500	39-40	1	0	non-sari
2	2014-12-29	2015-04-30	1	1	3230	39	1	0	non-sari
1	2014-01-07	2014-04-30	1	2	2900	38-39	1	0	non-sari
2	2015-01-06	2015-04-30	1	1	3505	39	1	0	non-sari
1	2013-11-23	2014-04-30	1	1	2100	38-39	3	0	non-sari
2	2015-01-15	2015-04-30	1	2	3235	39-40	1	0	non-sari
1	2014-01-28	2014-04-30	1	1	3250	38-39	1	0	non-sari
2	2015-01-15	2015-04-30	1	2	3240	39-40	1	0	non-sari
2	2015-02-03	2015-04-30	1	2	3190	39	1	0	non-sari
1	2014-01-25	2014-04-30	1	1	3695	39-40	1	0	non-sari
1	2013-12-15	2014-04-30	1	1	3600	38-39	1	0	non-sari
1	2014-02-08	2014-04-30	1	1	3400	39-40	1	0	non-sari
1	2014-03-08	2014-04-30	1	1	3085	39-40	1	0	non-sari
1	2014-02-28	2014-04-30	1	2	3510	39-40	1	0	non-sari
1	2014-03-08	2014-04-30	1	1	3550	39-40	1	0	non-sari
2	2015-02-13	2015-04-30	1	1	3500	40	1	0	non-sari
2	2015-01-02	2015-04-30	1	1	3010	39-40	1	0	non-sari
2	2014-10-03	2015-03-15	1	2	3200	39-40	1	0	non-sari
1	2014-03-09	2014-04-30	1	1	3600	39-40	1	0	non-sari
1	2014-02-24	2014-04-30	1	1	3700	39-40	1	0	non-sari
2	2015-03-02	2015-04-30	1	2	2950	39	1	0	non-sari
1	2014-01-29	2014-04-30	1	1	3000	39-40	1	0	non-sari
1	2014-02-11	2014-04-30	1	1	3200	39-40	1	0	non-sari
2	2015-01-28	2015-04-30	1	1	2705	39	1	0	non-sari
2	2015-02-14	2015-04-30	1	2	2950	39-40	1	0	non-sari
2	2015-01-25	2015-04-30	1	1	3470	39-40	1	0	non-sari
2	2015-02-24	2015-04-30	1	2	3325	39-40	1	0	non-sari
2	2015-02-26	2015-04-30	1	2	3820	40	1	0	non-sari
2	2015-03-02	2015-04-30	1	1	3160	39-40	1	0	non-sari
2	2015-01-26	2015-04-30	1	1	3500	39-40	1	0	non-sari
1	2014-03-10	2014-04-30	1	1	3220	39-40	1	0	non-sari
2	2015-02-04	2015-04-30	1	1	3190	39-40	1	0	non-sari
1	2014-04-05	2014-04-30	1	1	3040	39-40	1	0	non-sari
2	2015-02-11	2015-04-30	1	2	3210	39-40	1	0	non-sari
1	2014-03-15	2014-04-30	1	1	3290	39-40	1	0	non-sari
1	2014-04-13	2014-04-30	1	2	3100	39-40	1	0	non-sari
1	2014-04-13	2014-04-30	1	2	3580	39-40	1	0	non-sari
1	2014-04-13	2014-04-30	1	2	3490	39-40	1	0	non-sari
1	2014-03-25	2014-04-30	1	2	3610	39-40	1	0	non-sari
2	2015-02-09	2015-04-30	1	2	3190	39-40	1	0	non-sari
1	2014-04-20	2014-04-30	1	1	3170	39-40	1	0	non-sari
2	2015-02-21	2015-04-30	1	2	2810	39	1	0	non-sari
1	2014-03-20	2014-04-30	1	1	3300	39-40	1	0	non-sari
2	2015-02-16	2015-04-30	1	1	3800	40	1	0	non-sari
1	2014-02-02	2014-04-30	1	2	3700	39-40	1	0	non-sari
2	2015-02-18	2015-04-30	1	2	3200	39	1	0	non-sari
2	2015-03-09	2015-04-30	1	2	3020	39-40	1	0	non-sari
2	2015-03-10	2015-04-30	1	2	3590	40	1	0	non-sari
2	2015-01-26	2015-04-30	1	1	3010	39-40	1	0	non-sari
2	2015-02-03	2015-04-30	1	2	3700	40	1	0	non-sari
1	2014-03-25	2014-04-30	1	2	3100	39-40	1	0	non-sari
2	2015-01-20	2015-04-30	1	1	3520	40	1	0	non-sari
2	2015-02-02	2015-04-30	1	1	4360	39-40	1	0	non-sari
2	2015-01-15	2015-04-30	1	1	3270	39-40	1	0	non-sari
2	2015-01-17	2015-04-30	1	2	3300	39-40	1	0	non-sari
2	2014-12-24	2015-04-30	1	1	3400	40	1	0	non-sari
2	2014-12-30	2015-04-30	1	1	3300	39	1	0	non-sari
2	2014-12-24	2015-04-30	1	1	3200	39	1	0	non-sari
2	2015-02-14	2015-04-30	1	1	3900	40	1	0	non-sari
2	2014-12-02	2015-04-30	1	1	3020	39-40	1	0	non-sari
2	2014-12-28	2015-04-30	1	1	3200	39	1	0	non-sari
2	2015-03-16	2015-04-30	1	2	3100	40	1	0	non-sari
2	2015-04-08	2015-04-30	1	1	3700	39-40	1	0	non-sari
2	2015-04-10	2015-04-30	1	2	3430	39-40	1	0	non-sari
2	2015-04-13	2015-04-30	1	1	3700	40	1	0	non-sari
2	2015-03-12	2015-04-30	1	2	3300	39-40	1	0	non-sari
2	2015-04-13	2015-04-30	1	2	3200	39	1	0	non-sari
2	2015-04-13	2015-04-30	1	1	3600	40	1	0	non-sari
2	2015-04-10	2015-04-30	1	1	3690	40	1	0	non-sari
2	2015-03-25	2015-04-30	1	1	3300	39-40	1	0	non-sari
2	2015-04-17	2015-04-30	1	1	3400	39-40	1	0	non-sari
2	2014-11-10	2015-04-22	1	2	2900	39	1	0	non-sari
2	2015-02-04	2015-04-30	1	1	3300	39-40	1	0	non-sari
2	2015-01-14	2015-04-30	1	1	3470	39-40	1	1	notTested	2015-01-13	2015-01-13	2015-01-23
1	2014-02-14	2014-04-30	1	1	3630	39-40	1	1	notTested	2014-02-25	2014-03-04	2014-03-12
2	2014-12-21	2015-04-30	1	1	3200	39-40	1	1	notTested	2015-01-12	2015-01-13	2015-01-20
2	2015-02-03	2015-04-30	1	1	3500	39-40	1	1	neg	2015-03-08	2015-03-10	2015-03-18
2	2014-12-08	2015-04-30	1	1	1980	37-38	3	1	neg	2015-01-19	2015-01-22	2015-02-13
1	2013-12-12	2014-04-30	1	2	3240	39-40	1	1	neg	2014-01-26	2014-01-27	2014-02-14
2	2014-10-10	2015-03-21	1	1	3390	39-40	1	1	notTested	2014-11-26	2014-11-27	2014-12-05
2	2014-11-01	2015-04-12	1	1	2500	38	1	1	notTested	2014-12-19	2014-12-22	2015-01-05
2	2014-12-21	2015-04-30	1	1	3200	39-40	1	2	notTested	2015-02-16	2015-02-16	2015-02-23
2	2014-10-29	2015-04-09	1	1	3310	39	1	1	neg	2014-12-25	2014-12-25	2014-12-30
2	2014-10-08	2015-03-19	1	2	2895	39	1	1	neg	2014-12-09	2014-12-11	2014-12-23
2	2014-10-29	2015-04-09	1	1	3310	39	1	2	rsv	2014-12-31	2015-01-03	2015-01-12
1	2013-12-17	2014-04-30	1	1	3725	38-39	1	1	rsv	2014-02-19	2014-02-20	2014-02-27
2	2014-09-20	2015-03-01	1	1	3050	39-40	1	1	notTested	2014-11-30	2014-12-01	2014-12-08
1	2013-12-05	2014-04-30	1	2	3435	39-40	1	1	notTested	2014-02-15	2014-03-02	2014-03-10
1	2013-12-18	2014-04-30	1	2	3340	38-39	1	1	neg	2014-03-06	2014-03-13	2014-03-24
2	2014-09-14	2015-02-23	1	2	3030	39	1	1	notTested	2014-12-01	2014-12-02	2014-12-09
1	2013-12-03	2014-04-30	1	1	3860	39-40	1	1	notTested	2014-02-23	2014-03-04	2014-03-12
2	2014-12-21	2015-04-30	1	1	3200	39-40	1	3	neg	2015-03-18	2015-03-22	2015-04-10
1	2013-10-18	2014-03-29	1	1	3400	39-40	1	1	notTested	2014-02-04	2014-02-07	2014-02-19
2	2014-11-30	2015-04-30	1	1	3200	39	1	1	neg	2015-04-01	2015-04-05	2015-04-15
1	2013-10-18	2014-03-29	1	1	3400	39-40	1	2	notTested	2014-02-25	2014-02-26	2014-03-05
2	2014-12-02	2015-04-30	1	2	3500	39-40	1	1	notTested	2015-04-12	2015-04-16	2015-04-24
2	2014-10-16	2015-03-27	1	2	3500	39-40	1	1	neg	2015-02-25	2015-02-27	2015-03-06
2	2014-10-05	2015-03-16	1	2	3300	39-40	1	0	non-sari
2	2014-10-10	2015-03-21	1	2	2900	39-40	1	0	non-sari
2	2014-10-14	2015-03-25	1	1	3540	39-40	1	0	non-sari
1	2013-10-20	2014-03-31	1	1	2800	37-38	1	0	non-sari
1	2013-11-04	2014-04-15	1	2	3370	39-40	1	0	non-sari
2	2014-11-02	2015-04-13	1	1	3845	39-40	1	0	non-sari
2	2014-11-20	2015-04-30	1	1	3300	39-40	1	0	non-sari
1	2013-11-18	2014-04-29	1	2	3550	37-38	1	0	non-sari
2	2014-11-03	2015-04-14	1	2	3400	39-40	1	0	non-sari
1	2013-10-27	2014-04-07	1	1	1636	36-37	3	0	non-sari
2	2014-10-28	2015-04-08	1	1	3500	39	1	0	non-sari
1	2013-12-05	2014-04-30	1	1	3450	39-40	1	0	non-sari
1	2013-11-17	2014-04-28	1	1	3450	39-40	1	0	non-sari
2	2014-12-10	2015-04-30	1	1	4100	40	1	0	non-sari
2	2014-12-28	2015-04-30	1	2	3600	40	1	0	non-sari
1	2014-01-03	2014-04-30	1	1	3675	39-40	1	0	non-sari
1	2013-12-10	2014-04-30	1	2	5010	39-40	1	0	non-sari
1	2013-12-07	2014-04-30	1	2	3300	39-40	1	0	non-sari
1	2014-01-02	2014-04-30	1	2	3310	39-40	1	0	non-sari
2	2014-09-10	2015-02-19	1	1	3300	39-40	1	0	non-sari
1	2014-01-02	2014-04-30	1	1	3315	39-40	1	0	non-sari
1	2014-01-13	2014-04-30	1	1	3880	39-40	1	0	non-sari
1	2014-01-02	2014-04-30	1	1	3635	39-40	1	0	non-sari
1	2013-11-24	2014-04-30	1	2	1890	38-39	3	0	non-sari
2	2015-01-06	2015-04-30	1	2	3255	39	1	0	non-sari
1	2014-02-04	2014-04-30	1	2	2680	38-39	1	0	non-sari
1	2014-02-14	2014-04-30	1	2	3050	39-40	1	0	non-sari
2	2015-01-06	2015-04-30	1	2	3400	39-40	1	0	non-sari
2	2014-11-18	2015-04-29	1	2	3690	39-40	1	0	non-sari
1	2014-02-05	2014-04-30	1	1	2600	38-39	1	0	non-sari
1	2013-11-04	2014-04-15	1	2	3090	39-40	1	0	non-sari
1	2014-02-26	2014-04-30	1	2	3560	39-40	1	0	non-sari
1	2014-02-14	2014-04-30	1	2	3580	39-40	1	0	non-sari
2	2014-09-08	2015-02-17	1	2	3480	39-40	1	0	non-sari
2	2015-01-23	2015-04-30	1	2	5100	40-41	1	0	non-sari
2	2015-02-20	2015-04-30	1	1	3100	39-40	1	0	non-sari
2	2015-01-28	2015-04-30	1	1	3400	39-40	1	0	non-sari
2	2015-02-16	2015-04-30	1	1	3380	39-40	1	0	non-sari
1	2014-04-01	2014-04-30	1	1	3460	39-40	1	0	non-sari
1	2014-04-01	2014-04-30	1	1	3600	39-40	1	0	non-sari
2	2015-02-02	2015-04-30	1	1	3020	39-40	1	0	non-sari
1	2014-03-15	2014-04-30	1	1	2000	38-39	3	0	non-sari
1	2014-04-27	2014-04-30	1	1	3200	39-40	1	0	non-sari
1	2014-02-20	2014-04-30	1	1	2900	39-40	1	0	non-sari
1	2014-04-15	2014-04-30	1	1	3580	39-40	1	0	non-sari
1	2014-03-25	2014-04-30	1	2	2890	39-40	1	0	non-sari
1	2014-03-25	2014-04-30	1	2	3040	39-40	1	0	non-sari
1	2014-02-20	2014-04-30	1	1	3300	39-40	1	0	non-sari
2	2015-02-18	2015-04-30	1	1	3680	40	1	0	non-sari
1	2014-04-22	2014-04-30	1	2	2950	39-40	1	0	non-sari
2	2015-01-23	2015-04-30	1	2	3400	40	1	0	non-sari
2	2015-01-24	2015-04-30	1	2	3010	39	1	0	non-sari
1	2014-02-25	2014-04-30	1	2	3550	39-40	1	0	non-sari
2	2014-12-20	2015-04-30	1	2	3800	40	1	0	non-sari
2	2014-12-02	2015-04-30	1	1	2900	38	1	0	non-sari
2	2014-11-25	2015-04-30	1	2	3000	39	1	0	non-sari
2	2015-02-04	2015-04-30	1	2	3210	39-40	1	0	non-sari
2	2014-12-02	2015-04-30	1	2	3190	39-40	1	0	non-sari
2	2015-03-27	2015-04-30	1	2	3600	39-40	1	0	non-sari
2	2015-03-30	2015-04-30	1	1	4770	40	1	0	non-sari
2	2015-04-09	2015-04-30	1	1	3375	39	1	0	non-sari
2	2015-04-03	2015-04-30	1	1	3550	39-40	1	0	non-sari
2	2015-04-04	2015-04-30	1	1	3300	39-40	none	0	non-sari
2	2014-12-02	2015-04-30	1	2	3400	39-40	1	0	non-sari
2	2014-11-20	2015-04-30	1	2	3190	39	1	0	non-sari
2	2015-04-08	2015-04-30	1	2	3310	39-40	1	0	non-sari
2	2014-12-24	2015-04-30	1	1	3500	39-40	1	1	neg	2014-12-31	2015-01-01	2015-01-10
1	2014-01-12	2014-04-30	1	2	3100	39-40	1	1	notTested	2014-02-04	2014-02-09	2014-02-17
1	2014-01-12	2014-04-30	1	2	2900	39-40	1	1	notTested	2014-02-04	2014-02-04	2014-02-17
1	2013-11-01	2014-04-11	1	2	3200	39-40	1	1	notTested	2013-12-05	2013-12-06	2013-12-16
1	2013-11-04	2014-04-14	1	1	1900	36-37	3	1	notTested	2014-01-02	2014-01-02	2014-01-08
1	2013-11-01	2014-04-11	1	1	3420	39-40	1	1	neg	2014-01-01	2014-01-08	2014-01-15
1	2013-12-03	2014-04-30	1	1	3450	39-40	1	1	notTested	2014-02-03	2014-02-03	2014-02-13
1	2013-12-02	2014-04-30	1	2	2535	38-39	1	1	notTested	2014-02-04	2014-02-05	2014-02-18
2	2014-10-10	2015-03-20	1	1	3600	39-40	1	1	notTested	2015-01-02	2015-01-02	2015-01-08
1	2013-11-20	2014-04-30	1	2	3595	39-40	1	1	notTested	2014-03-14	2014-03-18	2014-03-26
1	2013-11-05	2014-04-15	1	1	2020	38-39	1	1	notTested	2014-02-27	2014-02-28	2014-03-12
1	2013-11-11	2014-04-21	1	1	4085	39-40	1	1	notTested	2014-04-08	2014-04-18	2014-04-25
1	2013-12-30	2014-01-03	1	1	3400	39-40	1	1	notTested	2013-12-25	2014-01-01	2014-01-10
2	2014-10-10	2015-03-20	1	1	3400	39-40	1	0	non-sari
1	2013-11-11	2014-04-21	1	2	3920	40	1	0	non-sari
1	2013-11-11	2014-04-21	1	1	4325	40-41	1	0	non-sari
1	2013-11-25	2014-04-30	1	1	3200	39-40	1	0	non-sari
2	2014-10-10	2015-03-20	1	1	3200	39-40	1	0	non-sari
1	2013-11-05	2014-04-15	1	1	1735	36-37	3	0	non-sari
1	2013-12-09	2014-04-30	1	2	3230	39-40	1	0	non-sari
1	2013-11-09	2014-04-19	1	2	3450	39-40	1	0	non-sari
2	2014-10-29	2015-04-08	1	2	3900	40	1	0	non-sari
1	2013-11-14	2014-04-24	1	1	3280	39-40	1	0	non-sari
1	2013-12-16	2014-04-30	1	2	3200	39-40	1	0	non-sari
1	2013-12-30	2014-04-30	1	1	3300	39-40	1	0	non-sari
2	2014-10-01	2015-03-11	1	2	3390	39-40	1	0	non-sari
1	2013-12-12	2014-04-30	1	2	5100	39-40	1	0	non-sari
2	2015-01-28	2015-04-30	1	2	3300	39-40	1	0	non-sari
1	2014-01-03	2014-04-30	1	2	3425	39-40	1	0	non-sari
2	2014-12-24	2015-04-30	1	2	3150	39-40	1	0	non-sari
2	2014-12-10	2015-04-30	1	2	3515	40	1	0	non-sari
1	2014-01-08	2014-04-30	1	1	3000	39-40	1	0	non-sari
1	2013-11-30	2014-04-30	1	1	2935	38-39	1	0	non-sari
1	2014-01-10	2014-04-30	1	1	3735	39-40	1	0	non-sari
1	2013-11-22	2014-04-30	1	1	3410	38-39	1	0	non-sari
1	2014-01-24	2014-04-30	1	1	3415	39-40	1	0	non-sari
1	2014-01-12	2014-04-30	1	2	3715	39-40	1	0	non-sari
1	2014-01-25	2014-04-30	1	1	3590	38-39	1	0	non-sari
1	2014-01-10	2014-04-30	1	2	3080	39-40	1	0	non-sari
1	2014-02-10	2014-04-30	1	2	3200	39-40	1	0	non-sari
1	2014-02-28	2014-04-30	1	1	3500	39-40	1	0	non-sari
1	2014-02-09	2014-04-30	1	1	4000	39-40	1	0	non-sari
1	2014-03-15	2014-04-30	1	2	3300	39-40	1	0	non-sari
1	2014-04-25	2014-04-30	1	2	3530	39-40	1	0	non-sari
2	2015-02-27	2015-04-30	1	1	2790	39	1	0	non-sari
1	2014-04-20	2014-04-30	1	1	3060	39-40	1	0	non-sari
2	2015-02-02	2015-04-30	1	1	3500	39-40	1	0	non-sari
2	2015-02-04	2015-04-30	1	2	3480	39	1	0	non-sari
1	2014-03-25	2014-04-30	1	2	3210	39-40	1	0	non-sari
1	2014-03-20	2014-04-30	1	2	3560	39-40	1	0	non-sari
1	2014-03-15	2014-04-30	1	1	3010	39-40	1	0	non-sari
1	2014-04-12	2014-04-30	1	1	3400	39-40	1	0	non-sari
1	2014-02-10	2014-04-30	1	1	3300	39-40	1	0	non-sari
1	2014-03-28	2014-04-30	1	1	3510	39-40	1	0	non-sari
2	2014-10-30	2015-04-09	1	2	3300	39	1	0	non-sari
2	2014-11-02	2015-04-11	1	2	3280	39-40	1	1	neg	2014-11-23	2014-11-25	2014-12-01
2	2014-10-01	2015-03-10	1	1	3590	39-40	1	1	notTested	2014-10-28	2014-10-31	2014-11-10
2	2014-12-10	2015-04-30	1	1	2800	39	1	1	notTested	2015-01-07	2015-01-17	2015-01-26
2	2014-12-26	2015-04-30	1	1	3300	39-40	1	1	neg	2015-01-27	2015-01-27	2015-01-30
1	2014-02-14	2014-04-30	1	2	2800	38-39	1	1	notTested	2014-03-22	2014-03-29	2014-04-15
1	2014-02-14	2014-04-30	1	2	2750	38-39	1	1	notTested	2014-03-24	2014-03-29	2014-04-15
1	2014-01-10	2014-04-30	1	1	3650	39-40	1	1	notTested	2014-02-18	2014-02-18	2014-02-24
1	2013-11-20	2014-04-29	1	1	3460	39-40	1	1	notTested	2013-12-31	2014-01-03	2014-01-09
2	2014-12-26	2015-04-30	1	1	3300	39-40	1	2	neg	2015-02-16	2015-02-17	2015-03-05
2	2014-11-02	2015-04-11	1	2	3280	39-40	1	2	neg	2015-01-04	2015-01-07	2015-01-12
1	2013-10-12	2014-03-21	1	2	2855	38-39	1	1	neg	2013-12-28	2013-12-28	2014-01-09
1	2013-10-12	2014-03-21	1	2	2855	38-39	1	2	notTested	2014-01-14	2014-01-14	2014-01-20
1	2013-10-12	2014-03-21	1	2	2855	38-39	1	3	notTested	2014-02-10	2014-02-17	2014-02-26
2	2014-10-01	2015-03-10	1	1	3590	39-40	1	2	notTested	2015-02-02	2015-02-11	2015-02-17
1	2013-11-20	2014-04-29	1	1	3460	39-40	1	2	notTested	2014-04-01	2014-04-01	2014-04-04
1	2013-10-29	2014-04-07	1	2	3300	39-40	1	1	neg	2014-03-17	2014-03-18	2014-03-25
1	2013-11-01	2014-04-10	1	1	3950	39-40	1	0	non-sari
1	2013-11-08	2014-04-17	1	1	3500	39-40	1	0	non-sari
1	2013-11-16	2014-04-25	1	2	3090	39-40	1	0	non-sari
2	2014-11-10	2015-04-19	1	1	3080	39	1	0	non-sari
1	2013-12-10	2014-04-30	1	2	3400	39-40	1	0	non-sari
1	2014-01-03	2014-04-30	1	2	3580	39-40	1	0	non-sari
1	2014-01-02	2014-04-30	1	2	3260	39-40	1	0	non-sari
1	2014-01-24	2014-04-30	1	1	3200	38-39	1	0	non-sari
1	2014-01-14	2014-04-30	1	1	3980	38-39	1	0	non-sari
2	2014-12-10	2015-04-30	1	2	3700	40	1	0	non-sari
1	2014-01-24	2014-04-30	1	1	3470	39-40	1	0	non-sari
1	2014-01-24	2014-04-30	1	2	4400	39-40	1	0	non-sari
1	2014-01-25	2014-04-30	1	2	3010	39-40	1	0	non-sari
1	2014-02-12	2014-04-30	1	1	3200	39-40	1	0	non-sari
1	2014-02-01	2014-04-30	1	1	3360	39-40	1	0	non-sari
1	2014-02-20	2014-04-30	1	1	3400	39-40	1	0	non-sari
1	2014-02-11	2014-04-30	1	1	3400	39-40	1	0	non-sari
1	2014-03-30	2014-04-30	1	2	3200	39-40	1	0	non-sari
1	2014-04-04	2014-04-30	1	1	4240	39-40	1	0	non-sari
1	2014-02-27	2014-04-30	1	1	3020	39-40	1	0	non-sari
1	2014-02-02	2014-04-30	1	2	3060	39-40	1	0	non-sari
1	2014-03-15	2014-04-30	1	2	3020	39-40	1	0	non-sari
2	2015-04-03	2015-04-30	1	1	3400	38-39	1	0	non-sari
2	2015-04-04	2015-04-30	1	1	3190	38-39	1	0	non-sari
2	2015-04-03	2015-04-30	1	1	3510	39	1	0	non-sari
2	2015-04-03	2015-04-30	1	1	3300	39-40	1	0	non-sari
2	2015-02-01	2015-04-30	1	1	3590	39-40	1	0	non-sari
1	2014-02-24	2014-04-30	1	1	3225	39-40	1	1	notTested	2014-03-24	2014-03-29	2014-04-07
1	2014-02-02	2014-04-30	1	1	3420	39-40	1	1	notTested	2014-03-17	2014-04-11	2014-04-21
1	2014-02-02	2014-04-30	1	1	3570	39-40	1	1	notTested	2014-03-18	2014-03-23	2014-03-31
1	2013-11-06	2014-04-14	1	2	1800	36-37	3	1	notTested	2013-12-25	2014-01-03	2014-01-09
1	2013-12-01	2014-04-30	1	2	3300	38--39	1	1	notTested	2014-01-21	2014-01-22	2014-02-10
1	2013-10-11	2014-03-19	1	2	2800	37-38	1	0	non-sari
1	2013-10-29	2014-04-06	1	1	4015	40-41	1	0	non-sari
1	2013-10-11	2014-03-19	1	2	2950	38-39	1	0	non-sari
2	2014-11-01	2015-04-09	1	2	2300	39	3	0	non-sari
2	2014-10-01	2015-03-09	1	2	3400	39-40	1	0	non-sari
1	2013-12-30	2014-04-30	1	2	3440	39-40	1	0	non-sari
2	2014-11-30	2015-04-30	1	2	2605	39	1	0	non-sari
2	2015-01-03	2015-04-30	1	2	3380	39-40	1	0	non-sari
1	2013-12-28	2014-04-30	1	1	3300	39-40	1	0	non-sari
1	2014-03-30	2014-04-30	1	1	3100	39-40	1	0	non-sari
1	2014-03-01	2014-04-30	1	2	3700	39-40	1	0	non-sari
2	2015-03-19	2015-04-30	1	2	3460	39-40	1	0	non-sari
2	2015-02-20	2015-04-30	1	2	2800	40	1	0	non-sari
1	2014-03-20	2014-04-30	1	2	3400	39-40	1	0	non-sari
1	2014-04-03	2014-04-30	1	1	3680	39-40	1	0	non-sari
1	2013-11-04	2014-04-11	1	1	3210	39-40	1	1	notTested	2013-11-30	2013-12-09	2013-12-16
1	2014-03-01	2014-04-30	1	2	3400	39-40	1	1	notTested	2014-04-05	2014-04-11	2014-04-18
2	2014-10-01	2015-03-08	1	2	3280	39-40	1	1	notTested	2014-12-13	2014-12-13	2014-12-23
1	2013-10-29	2014-04-05	1	2	3300	40	1	0	non-sari
2	2014-10-01	2015-03-08	1	2	2750	38-39	1	0	non-sari
2	2014-10-01	2015-03-08	1	1	3600	39-40	1	0	non-sari
2	2014-10-01	2015-03-08	1	1	2300	39-40	3	0	non-sari
2	2014-10-01	2015-03-08	1	1	2020	39-40	3	0	non-sari
1	2013-10-14	2014-03-21	1	2	3330	39-40	1	0	non-sari
1	2013-12-09	2014-04-30	1	1	3210	38-39	1	0	non-sari
1	2013-12-30	2014-04-30	1	2	3160	39-40	1	0	non-sari
1	2014-02-15	2014-04-30	1	2	3450	39-40	1	0	non-sari
1	2014-01-05	2014-04-30	1	2	3500	39-40	1	0	non-sari
1	2014-01-20	2014-04-30	1	2	3300	39-40	1	0	non-sari
1	2014-02-15	2014-04-30	1	1	3450	39-40	1	0	non-sari
1	2014-03-17	2014-04-30	1	2	3200	39-40	1	0	non-sari
2	2015-04-03	2015-04-30	1	1	3590	40	1	0	non-sari
2	2015-04-03	2015-04-30	1	1	3500	39-40	1	0	non-sari
2	2014-12-10	2015-04-30	1	2	2700	39-40	1	1	neg	2014-12-11	2014-12-18	2014-12-23
2	2014-12-10	2015-04-30	1	2	2300	39-40	3	1	neg	2014-12-13	2014-12-17	2014-12-23
2	2014-12-10	2015-04-30	1	2	2700	39-40	1	2	notTested	2014-12-31	2015-01-08	2015-01-15
1	2014-01-24	2014-04-30	1	2	2900	38-39	1	1	notTested	2014-03-09	2014-03-10	2014-03-17
2	2014-10-01	2015-03-07	1	2	3000	39-40	1	0	non-sari
1	2013-10-20	2014-03-26	1	2	3000	39-40	1	0	non-sari
1	2013-11-01	2014-04-07	1	2	2800	38-39	1	0	non-sari
1	2013-12-03	2014-04-30	1	1	4012	40-41	1	0	non-sari
1	2013-12-17	2014-04-30	1	2	3870	39-40	1	0	non-sari
1	2013-12-30	2014-04-30	1	1	3110	39-40	1	0	non-sari
1	2014-01-03	2014-04-30	1	1	3015	39-40	1	0	non-sari
1	2014-01-24	2014-04-30	1	1	2970	38-39	1	0	non-sari
1	2014-01-24	2014-04-30	1	1	3480	39-40	1	0	non-sari
1	2014-01-24	2014-04-30	1	1	3030	39-40	1	0	non-sari
2	2015-01-06	2015-04-30	1	1	3010	40	1	0	non-sari
1	2014-03-18	2014-04-30	1	2	3300	39-40	1	0	non-sari
1	2014-03-24	2014-04-30	1	1	3250	39-40	1	0	non-sari
2	2015-03-14	2015-04-30	1	2	3270	39-40	1	0	non-sari
1	2013-11-05	2014-04-11	1	1	3290	39-40	1	0	non-sari
1	2014-02-02	2014-04-30	1	2	3200	39-40	1	0	non-sari
1	2014-04-15	2014-04-30	1	2	3510	39-40	1	0	non-sari
1	2014-01-15	2014-04-30	1	1	3400	39-40	1	1	notTested	2014-01-30	2014-01-30	2014-02-04
2	2014-10-01	2015-03-06	1	1	3320	39-40	1	1	notTested	2014-11-26	2014-11-28	2014-12-05
1	2013-12-05	2014-04-30	1	1	3370	39-40	1	1	notTested	2014-04-06	2014-04-07	2014-04-17
1	2013-10-29	2014-04-03	1	2	3450	39-40	1	1	notTested	2014-03-07	2014-03-11	2014-03-21
1	2013-11-12	2014-04-17	1	2	2700	38-39	1	0	non-sari
2	2014-12-01	2015-04-30	1	2	3500	40	1	0	non-sari
2	2014-10-01	2015-03-06	1	2	3200	39	1	0	non-sari
1	2013-11-25	2014-04-30	1	2	3185	39-40	1	0	non-sari
1	2013-12-03	2014-04-30	1	1	3400	39-40	1	0	non-sari
1	2013-12-03	2014-04-30	1	1	3420	38-39	1	0	non-sari
1	2013-12-05	2014-04-30	1	1	3585	39-40	1	0	non-sari
1	2013-12-09	2014-04-30	1	1	3560	39-40	1	0	non-sari
1	2013-12-16	2014-04-30	1	2	3305	38-39	1	0	non-sari
1	2013-12-03	2014-04-30	1	1	3450	39-40	1	0	non-sari
1	2014-01-03	2014-04-30	1	1	3190	39-40	1	0	non-sari
1	2014-02-11	2014-04-30	1	1	3200	38-39	1	0	non-sari
2	2015-01-06	2015-04-30	1	1	3320	39-40	1	0	non-sari
2	2015-01-05	2015-04-30	1	2	4000	40	1	0	non-sari
1	2014-03-24	2014-04-30	1	1	3590	39-40	1	0	non-sari
1	2014-03-24	2014-04-30	1	1	3700	39-40	1	0	non-sari
1	2014-03-24	2014-04-30	1	1	3630	39-40	1	0	non-sari
1	2014-03-10	2014-04-30	1	2	3100	39-40	1	0	non-sari
1	2014-03-10	2014-04-30	1	2	2900	39-40	1	0	non-sari
1	2014-03-25	2014-04-30	1	2	3200	39-40	1	0	non-sari
1	2013-11-25	2014-04-29	1	1	2740	38-39	1	1	rsv	2014-01-09	2014-01-10	2014-01-20
1	2013-11-11	2014-04-15	1	1	3820	39-40	1	1	notTested	2014-01-18	2014-01-21	2014-01-28
1	2013-11-11	2014-04-15	1	1	3790	39-40	1	0	non-sari
1	2013-10-29	2014-04-02	1	2	3360	37-38	1	0	non-sari
1	2013-10-29	2014-04-02	1	1	3250	39-40	1	0	non-sari
1	2013-10-01	2014-03-05	1	1	3010	39-40	1	0	non-sari
2	2014-10-01	2015-03-05	1	2	3030	39-40	1	0	non-sari
1	2013-12-05	2014-04-30	1	2	3020	38-39	2	0	non-sari
2	2014-10-01	2015-03-05	1	1	3580	39	1	0	non-sari
1	2014-01-02	2014-04-30	1	2	2940	38-39	1	0	non-sari
1	2014-01-15	2014-04-30	1	2	2785	39-40	1	0	non-sari
1	2014-01-24	2014-04-30	1	2	3280	38-39	1	0	non-sari
1	2014-01-24	2014-04-30	1	1	3510	39-40	1	0	non-sari
1	2014-03-18	2014-04-30	1	1	2990	38-39	1	0	non-sari
1	2014-03-24	2014-04-30	1	1	3130	39-40	1	0	non-sari
1	2014-03-24	2014-04-30	1	1	3300	39-40	1	0	non-sari
2	2015-03-15	2015-04-30	1	1	3705	40	1	0	non-sari
1	2014-03-15	2014-04-30	1	2	3020	39-40	1	0	non-sari
2	2015-01-28	2015-04-30	1	1	2900	38	1	0	non-sari
1	2014-01-24	2014-04-30	1	2	3200	39-40	1	1	notTested	2014-02-21	2014-02-23	2014-03-03
2	2014-10-01	2015-03-04	1	1	3500	39-40	1	1	notTested	2015-02-16	2015-02-17	2015-02-21
1	2013-10-01	2014-03-04	1	2	3490	39-40	1	1	notTested	2014-02-17	2014-03-15	2014-03-24
1	2013-10-29	2014-04-01	1	2	2800	39-40	1	0	non-sari
1	2013-11-25	2014-04-28	1	1	3450	39-40	1	0	non-sari
1	2013-12-16	2014-04-30	1	2	3180	39-40	1	0	non-sari
1	2013-12-16	2014-04-30	1	2	3510	38-39	1	0	non-sari
1	2013-12-17	2014-04-30	1	2	3555	39-40	1	0	non-sari
1	2013-12-17	2014-04-30	1	2	3550	39-40	1	0	non-sari
1	2014-01-03	2014-04-30	1	1	3500	39-40	1	0	non-sari
1	2014-01-15	2014-04-30	1	2	3535	39-40	1	0	non-sari
1	2014-01-24	2014-04-30	1	2	3080	38-39	1	0	non-sari
1	2014-03-18	2014-04-30	1	1	3450	39-40	1	0	non-sari
1	2014-03-18	2014-04-30	1	1	3170	39-40	1	0	non-sari
1	2014-03-24	2014-04-30	1	1	3475	39-40	1	0	non-sari
1	2014-01-24	2014-04-30	1	1	2100	38-39	3	0	non-sari
2	2015-03-16	2015-04-30	1	2	3490	39-40	1	0	non-sari
1	2014-04-10	2014-04-30	1	1	3600	39-40	1	0	non-sari
1	2014-04-10	2014-04-30	1	1	3500	39-40	1	0	non-sari
1	2014-03-28	2014-04-30	1	1	3700	39-40	1	0	non-sari
2	2014-10-15	2015-03-18	1	2	3300	40	1	0	non-sari
2	2014-10-01	2015-03-03	1	2	3100	39	1	1	notTested	2014-10-21	2014-10-22	2014-10-27
1	2013-11-12	2014-04-14	1	2	1900	36-37	3	1	neg	2013-12-29	2013-12-29	2014-01-09
2	2014-10-01	2015-03-03	1	1	3500	39-40	1	0	non-sari
1	2013-10-01	2014-03-02	1	1	3295	39-40	7	0	non-sari
1	2013-10-10	2014-03-10	1	2	3105	39-40	1	1	notTested	2013-11-13	2013-11-24	2013-11-29
1	2013-10-10	2014-03-10	1	2	3105	39-40	1	2	neg	2014-01-02	2014-01-10	2014-01-20
2	2014-10-01	2015-03-01	1	2	3200	39-40	1	0	non-sari
2	2014-10-01	2015-02-28	1	2	3500	39-40	1	0	non-sari
2	2014-10-01	2015-02-28	1	1	3290	39-40	1	0	non-sari
1	2013-10-01	2014-02-28	1	2	2715	37-38	1	0	non-sari
2	2014-10-01	2015-02-28	1	1	3450	39-40	1	0	non-sari
1	2013-10-05	2014-03-04	1	1	3540	39-40	1	0	non-sari
2	2014-10-01	2015-02-27	1	1	3600	39-40	1	1	rsv	2014-12-28	2014-12-29	2015-01-05
2	2014-10-01	2015-02-26	1	2	3400	39-40	1	0	non-sari
1	2013-10-10	2014-03-07	1	2	3260	39-40	1	0	non-sari
2	2014-10-01	2015-02-25	1	2	3190	39-40	1	0	non-sari
2	2014-10-01	2015-02-25	1	1	3300	39-40	1	0	non-sari
2	2014-10-01	2015-02-25	1	2	3200	39-40	1	0	non-sari
1	2013-10-10	2014-03-06	1	2	3650	39-40	1	0	non-sari
2	2014-10-01	2015-02-24	1	2	3300	39-40	1	1	notTested	2014-10-29	2014-10-30	2014-11-06
2	2014-10-01	2015-02-24	1	2	3860	39-40	1	1	notTested	2014-11-02	2014-11-02	2014-11-07
2	2014-10-01	2015-02-24	1	2	3500	39-40	1	0	non-sari
2	2014-10-01	2015-02-23	1	1	3435	39-40	1	0	non-sari
2	2014-10-01	2015-02-21	1	1	3300	39-40	1	1	neg	2014-11-12	2014-11-17	2014-12-19
2	2014-10-01	2015-02-21	1	1	3540	39-40	1	0	non-sari
2	2015-01-05	2015-04-30	1	1	3200	39	1	1	rsv	2015-01-07	2015-01-08	2015-01-12
2	2015-01-05	2015-04-30	1	1	3200	39	1	2	neg	2015-03-14	2015-03-18	2015-03-30
2	2014-10-01	2015-02-20	1	2	4250	39-40	1	0	non-sari
2	2014-10-01	2015-02-20	1	1	3920	39-40	1	0	non-sari
1	2013-10-20	2014-03-11	1	2	3010	39-40	1	0	non-sari
2	2014-10-01	2015-02-19	1	2	3610	39-40	1	0	non-sari
2	2014-10-01	2015-02-19	1	1	3280	39-40	1	0	non-sari
2	2014-10-01	2015-02-19	1	2	3080	39	1	0	non-sari
2	2014-10-01	2015-02-19	1	2	3250	39-40	1	0	non-sari
2	2014-10-01	2015-02-19	1	2	4350	39-40	1	0	non-sari
2	2014-10-01	2015-02-19	1	1	3400	39-40	1	0	non-sari
1	2013-10-28	2014-03-17	1	2	3550	39-40	1	0	non-sari
1	2013-10-28	2014-03-17	1	2	3850	40-41	1	0	non-sari
2	2014-10-01	2015-02-18	1	2	2435	38-39	1	0	non-sari
1	2013-10-29	2014-03-17	1	2	3390	39-40	1	0	non-sari
2	2014-10-01	2015-02-17	1	1	3500	39-40	1	0	non-sari
2	2014-10-01	2015-02-17	1	1	3500	40	1	0	non-sari
2	2014-10-01	2015-02-16	1	2	3145	39-40	1	0	non-sari
1	2013-10-20	2014-03-07	1	2	3070	39-40	1	0	non-sari
1	2013-10-20	2014-03-07	1	2	3090	39-40	1	0	non-sari
1	2013-10-29	2014-03-15	1	2	3265	39-40	1	0	non-sari
2	2014-10-01	2015-02-15	1	1	2980	38-39	1	0	non-sari
2	2014-10-01	2015-02-14	1	2	3900	39-40	1	0	non-sari
1	2013-10-29	2014-03-14	1	2	3145	39-40	1	0	non-sari
1	2013-10-29	2014-03-14	1	1	2960	37-38	1	0	non-sari
1	2013-10-29	2014-03-14	1	2	3025	39-40	1	0	non-sari
1	2013-10-29	2014-03-14	1	1	4075	40-41	1	0	non-sari
1	2013-10-28	2014-03-13	1	2	3430	39-40	1	0	non-sari
2	2014-10-01	2015-02-13	1	2	3500	39-40	1	1	neg	2014-11-25	2014-12-01	2014-12-12
1	2013-10-29	2014-03-13	1	2	3460	40	1	0	non-sari
1	2013-10-29	2014-03-13	1	2	3550	39-40	1	0	non-sari
1	2013-10-29	2014-03-13	1	2	2450	37-38	3	0	non-sari
1	2013-10-29	2014-03-13	1	1	3180	39-40	1	0	non-sari
2	2014-10-01	2015-02-13	1	1	3400	39-40	1	0	non-sari
2	2014-10-01	2015-02-13	1	1	3400	39-40	1	0	non-sari
2	2014-10-01	2015-02-13	1	1	3710	39-40	1	0	non-sari
1	2013-10-20	2014-03-04	1	2	2220	37-38	3	0	non-sari
1	2013-10-29	2014-03-12	1	1	3210	39-40	1	0	non-sari
1	2013-10-29	2014-03-12	1	1	3465	39-40	1	0	non-sari
2	2014-10-01	2015-02-11	1	2	3090	39-40	1	1	notTested	2014-12-13	2014-12-14	2014-12-26
2	2014-10-01	2015-02-11	1	1	4665	39-40	1	0	non-sari
1	2013-10-29	2014-03-11	1	1	3600	39-40	1	0	non-sari
1	2013-10-29	2014-03-10	1	2	3285	39-40	1	0	non-sari
2	2014-10-01	2015-02-10	1	2	3370	39-40	1	0	non-sari
1	2013-10-29	2014-03-09	1	2	3450	39-40	1	0	non-sari
2	2014-10-01	2015-02-09	1	1	3030	39-40	1	0	non-sari
2	2014-10-01	2015-01-06	1	2	3180	39-40	1	0	non-sari
2	2014-10-01	2015-02-09	1	2	3635	39-40	1	0	non-sari
1	2013-10-29	2014-03-08	1	1	3090	39-40	1	1	notTested	2013-10-27	2013-10-29	2013-11-11
2	2014-10-01	2015-02-08	1	1	3600	39-40	1	1	notTested	2014-12-31	2015-01-09	2015-01-15
1	2013-10-28	2014-03-07	1	2	3080	39-40	1	0	non-sari
2	2014-10-01	2015-02-08	1	1	3100	39	1	0	non-sari
2	2015-03-09	2015-04-30	1	1	3455	39-40	1	0	non-sari
1	2013-10-29	2014-03-07	1	1	3299	39-40	1	1	notTested	2013-11-16	2013-11-21	2013-11-26
1	2013-10-29	2014-03-07	1	2	3455	39-40	1	1	notTested	2014-01-19	2014-01-23	2014-01-29
1	2013-10-29	2014-03-07	1	2	3175	39-40	1	0	non-sari
2	2014-10-01	2015-02-06	1	2	3400	39-40	1	1	rsv	2014-12-21	2014-12-24	2014-12-30
2	2014-10-01	2015-02-06	1	2	3400	39-40	1	2	notTested	2014-12-30	2015-01-02	2015-01-07
2	2014-10-01	2015-02-06	1	1	3200	39-40	1	0	non-sari
1	2013-10-28	2014-03-05	1	2	3540	39-40	1	0	non-sari
2	2014-10-01	2015-02-06	1	2	3170	39-40	1	0	non-sari
1	2013-12-30	2014-04-30	1	1	3315	39-40	1	1	notTested	2013-12-09	2013-12-12	2013-12-23
1	2013-10-29	2014-03-05	1	2	1900	37-38	3	0	non-sari
1	2013-10-29	2014-03-05	1	1	3280	38-39	1	0	non-sari
2	2014-10-01	2015-02-05	1	2	3280	39-40	1	0	non-sari
1	2013-10-29	2014-03-05	1	2	3075	39-40	1	0	non-sari
1	2013-10-29	2014-03-05	1	2	3550	39-40	1	0	non-sari
1	2013-10-29	2014-03-05	1	2	3700	39-40	1	0	non-sari
2	2014-10-01	2015-02-05	1	2	3955	39-40	1	0	non-sari
2	2014-10-01	2015-02-05	1	2	3270	39	1	0	non-sari
2	2014-10-01	2015-02-04	1	1	3845	39-40	1	1	notTested	2014-11-20	2014-11-25	2014-12-01
2	2014-10-01	2015-02-04	1	1	2740	39-40	1	0	non-sari
2	2014-10-01	2015-02-04	1	1	3650	39-40	1	0	non-sari
1	2013-10-29	2014-03-04	1	1	3570	39-40	1	0	non-sari
1	2013-10-29	2014-03-04	1	1	3090	39-40	1	0	non-sari
1	2013-10-29	2014-03-04	1	1	3700	39-40	1	0	non-sari
2	2014-10-01	2015-02-04	1	1	3770	39-40	1	0	non-sari
2	2014-10-01	2015-02-04	1	2	3240	39-40	1	0	non-sari
2	2014-10-01	2015-02-04	1	2	3400	39-40	1	0	non-sari
1	2013-10-29	2014-03-03	1	1	3650	39-40	1	1	neg	2014-01-12	2014-01-15	2014-01-24
1	2013-10-29	2014-03-03	1	2	3695	39-40	1	1	notTested	2014-01-29	2014-01-29	2014-03-03
2	2014-10-01	2015-02-03	1	1	3170	39-40	1	0	non-sari
2	2014-10-01	2015-02-03	1	1	2935	38-39	1	0	non-sari
1	2013-10-20	2013-12-10	1	1	3340	39-40	1	0	non-sari
2	2014-10-01	2015-02-03	1	2	3200	39-40	1	0	non-sari
2	2014-10-01	2015-02-02	1	1	3500	39-40	1	1	notTested	2014-12-12	2014-12-12	2014-12-19
2	2014-10-01	2015-02-02	1	2	4730	39-40	1	0	non-sari
2	2014-10-01	2015-02-02	1	1	3140	39-40	1	0	non-sari
2	2014-10-01	2015-02-01	1	2	3190	39-40	7	1	neg	2014-11-05	2014-11-07	2014-11-13
1	2013-10-29	2014-03-01	1	2	3300	39-40	1	1	notTested	2014-01-29	2014-01-30	2014-02-03
2	2014-10-01	2015-02-01	1	1	3400	39-40	1	0	non-sari
2	2014-10-01	2015-02-01	1	1	3470	39	1	0	non-sari
2	2014-10-01	2015-01-30	1	1	3100	39-40	1	1	notTested	2014-10-08	2014-10-09	2014-10-14
2	2014-10-01	2015-01-30	1	1	3100	39-40	1	1	neg	2014-11-15	2014-11-15	2014-12-05
2	2014-10-01	2015-01-30	1	1	3100	39-40	1	2	notTested	2014-12-11	2014-12-16	2014-12-30
2	2014-10-01	2015-01-30	1	1	3100	39-40	1	3	notTested	2014-12-31	2015-01-01	2015-01-05
2	2014-10-01	2015-01-30	1	1	3100	39-40	1	4	neg	2015-01-11	2015-01-15	2015-01-20
1	2013-10-20	2014-02-18	1	2	3600	39-40	1	0	non-sari
2	2014-10-01	2015-01-29	1	1	3895	39-40	1	1	notTested	2014-11-30	2014-12-06	2014-12-12
2	2014-10-01	2015-01-29	1	1	3315	39-40	1	0	non-sari
1	2013-10-29	2014-02-26	1	1	3450	39-40	1	0	non-sari
2	2014-10-01	2015-01-29	1	2	2670	38-39	1	0	non-sari
1	2013-10-28	2014-02-25	1	1	3290	39-40	1	0	non-sari
1	2013-10-29	2014-02-25	1	2	3430	39-40	1	0	non-sari
1	2013-10-29	2014-02-25	1	1	3580	39-40	1	0	non-sari
1	2013-10-29	2014-02-25	1	2	3125	38-39	1	0	non-sari
1	2013-10-29	2014-02-25	1	2	3430	39-40	1	0	non-sari
1	2013-10-29	2014-02-25	1	2	3385	39-40	1	0	non-sari
2	2014-10-01	2015-01-28	1	1	3700	39-40	1	0	non-sari
1	2013-10-29	2014-02-24	1	2	3540	39-40	1	0	non-sari
1	2013-10-29	2014-02-24	1	2	3300	39-40	1	0	non-sari
1	2013-10-28	2014-02-23	1	1	3050	39-40	1	0	non-sari
2	2014-10-01	2015-01-26	1	2	3570	39-40	1	0	non-sari
1	2013-10-29	2014-02-23	1	2	3340	39-40	1	0	non-sari
1	2013-10-29	2014-02-23	1	1	3560	39-40	1	0	non-sari
2	2014-10-01	2015-01-26	1	2	3280	39-40	1	0	non-sari
1	2013-10-29	2014-02-23	1	1	3375	39-40	3	0	non-sari
1	2013-10-28	2014-02-22	1	2	2770	37-38	1	0	non-sari
2	2014-10-01	2015-01-26	1	2	3190	39	1	0	non-sari
1	2013-10-11	2014-02-05	1	2	3270	39-40	1	0	non-sari
1	2013-10-29	2014-02-22	1	2	3560	39-40	1	0	non-sari
1	2013-10-01	2014-01-24	1	2	3050	39-40	1	1	notTested	2014-01-03	2014-01-03	2014-01-18
1	2013-10-29	2014-02-21	1	1	4210	40-41	1	0	non-sari
1	2013-10-29	2014-02-21	1	2	3200	39-40	1	0	non-sari
1	2013-10-28	2014-02-20	1	2	3000	39-40	1	0	non-sari
2	2014-10-01	2015-01-24	1	1	3410	39-40	1	0	non-sari
2	2014-10-01	2015-01-23	1	1	3665	39-40	1	1	notTested	2014-12-16	2014-12-22	2014-12-30
2	2014-10-01	2015-01-23	1	2	3600	39-40	1	0	non-sari
1	2013-10-29	2014-02-20	1	2	3350	39-40	1	0	non-sari
2	2014-10-01	2015-01-23	1	1	3450	39	1	0	non-sari
1	2013-10-29	2014-02-20	1	2	3170	39-40	1	0	non-sari
2	2014-10-01	2015-01-23	1	2	3340	39-40	1	0	non-sari
2	2014-10-01	2015-01-23	1	2	3400	39-40	1	0	non-sari
2	2014-10-01	2015-01-23	1	2	3055	39-40	1	0	non-sari
1	2013-10-29	2014-02-19	1	2	3350	39-40	1	1	notTested	2014-01-19	2014-01-21	2014-01-28
2	2014-10-01	2015-01-22	1	1	3190	39-40	1	0	non-sari
2	2014-10-01	2015-01-22	1	1	3100	39-40	1	0	non-sari
1	2013-10-29	2014-02-19	1	1	3600	39-40	1	0	non-sari
1	2013-10-29	2014-02-19	1	1	3280	39-40	1	0	non-sari
1	2013-10-29	2014-02-19	1	2	3160	39-40	1	0	non-sari
1	2013-10-20	2014-02-10	1	1	3400	39-40	1	0	non-sari
1	2013-10-29	2014-02-17	2	1	3540	40-41	6	1	notTested	2014-01-25	2014-01-26	2014-02-03
1	2013-10-29	2014-02-17	2	1	3180	39-40	1	0	non-sari
2	2014-10-01	2015-01-20	2	2	3360	39-40	1	0	non-sari
2	2014-10-01	2015-01-19	2	2	3000	39	1	1	rsv	2014-11-17	2014-11-27	2014-12-07
1	2013-10-29	2014-02-16	2	1	3310	39-40	1	0	non-sari
1	2013-10-28	2014-02-15	2	2	3450	39-40	1	0	non-sari
2	2014-10-01	2015-01-19	2	2	3690	39-40	1	0	non-sari
1	2013-10-28	2014-02-14	2	1	3785	39-40	1	0	non-sari
1	2013-10-28	2014-02-13	2	2	3480	39-40	1	0	non-sari
1	2013-10-28	2014-02-13	2	2	3270	39-40	1	0	non-sari
2	2014-10-01	2015-01-17	2	1	3400	39-40	1	0	non-sari
2	2014-10-01	2015-01-17	2	1	2690	39-40	1	0	non-sari
2	2014-10-01	2015-01-16	2	1	3000	39	1	0	non-sari
2	2014-10-01	2015-01-16	2	2	3150	39-40	1	0	non-sari
1	2013-10-28	2014-02-12	2	2	3070	39-40	1	0	non-sari
2	2014-10-01	2015-01-15	2	2	4200	39-40	1	1	notTested	2014-11-28	2014-11-30	2014-12-10
2	2014-10-01	2015-01-15	2	2	4200	39-40	1	2	neg	2014-12-14	2014-12-15	2014-12-18
2	2014-10-01	2015-01-15	2	1	3385	37-38	1	0	non-sari
2	2014-10-01	2015-01-15	2	2	3300	39-40	1	0	non-sari
1	2013-10-28	2014-02-11	2	1	4360	40-41	1	0	non-sari
1	2013-10-28	2014-02-11	2	2	3505	39-40	1	0	non-sari
2	2014-10-01	2015-01-15	2	2	3700	39-40	1	0	non-sari
1	2013-10-20	2014-02-03	2	2	4000	40-41	1	0	non-sari
1	2013-10-28	2014-02-10	2	1	3300	39-40	1	1	neg	2013-11-25	2013-12-11	2013-12-20
1	2013-10-29	2014-02-11	2	2	4500	40-41	1	0	non-sari
2	2014-10-01	2015-01-14	2	2	3490	39-40	1	0	non-sari
1	2013-10-28	2014-02-10	2	1	2730	37-38	1	0	non-sari
2	2014-10-01	2015-01-14	2	2	3380	39-40	1	0	non-sari
1	2013-10-20	2014-02-02	2	1	2980	39-40	1	0	non-sari
2	2014-10-01	2015-01-13	2	2	3140	39-40	1	1	notTested	2014-10-30	2014-10-30	2014-11-07
2	2015-03-03	2015-04-30	2	1	3010	39-40	1	1	notTested	2015-04-19	2015-04-19	2015-04-27
2	2014-10-01	2015-01-13	2	1	2935	39	1	1	notTested	2014-12-09	2014-12-12	2014-12-18
2	2014-10-01	2015-01-13	2	2	3600	39-40	1	0	non-sari
1	2013-10-28	2014-02-09	2	1	3415	39-40	1	0	non-sari
2	2014-10-01	2015-01-13	2	1	3400	39-40	1	0	non-sari
1	2013-10-28	2014-02-08	2	1	3690	39-40	1	0	non-sari
1	2013-10-20	2014-01-31	2	1	3240	39-40	1	0	non-sari
1	2013-10-28	2014-02-07	2	2	3280	39-40	1	1	notTested	2013-10-24	2013-10-24	2013-10-31
2	2014-10-01	2015-01-11	2	1	3225	39-40	1	1	neg	2014-11-27	2014-12-02	2014-12-09
1	2013-10-28	2014-02-07	2	2	3330	39-40	1	1	notTested	2013-12-30	2013-12-31	2014-01-10
1	2013-10-28	2014-02-07	2	2	3280	39-40	1	2	notTested	2014-01-06	2014-01-10	2014-01-20
1	2013-10-01	2014-01-11	2	2	3360	39-40	1	1	neg	2013-12-10	2013-12-24	2014-01-05
1	2013-10-28	2014-02-07	2	2	3110	39-40	1	0	non-sari
1	2013-10-20	2014-01-30	2	1	3150	39-40	1	0	non-sari
1	2013-10-28	2014-02-06	2	1	3630	39-40	1	0	non-sari
2	2014-10-01	2015-01-10	2	2	3105	39-40	1	0	non-sari
2	2014-10-01	2015-01-10	2	2	2900	38	1	0	non-sari
2	2014-10-01	2015-01-10	2	2	3400	39-40	1	0	non-sari
2	2014-10-01	2015-01-09	2	1	2970	39-40	1	1	notTested	2014-11-18	2014-11-20	2014-11-28
2	2014-10-01	2015-01-09	2	2	2875	39-40	1	1	notTested	2014-11-20	2014-11-20	2014-11-28
2	2014-10-01	2015-01-09	2	1	3090	39-40	1	0	non-sari
1	2013-10-28	2014-02-05	2	2	2910	37-38	1	0	non-sari
2	2014-10-01	2015-01-09	2	1	3390	39-40	1	0	non-sari
1	2013-10-28	2014-02-04	2	2	4165	40-41	1	0	non-sari
2	2014-10-01	2015-01-08	2	2	2915	39-40	1	0	non-sari
2	2014-10-01	2015-01-08	2	2	3220	38-39	1	0	non-sari
2	2014-10-01	2015-01-08	2	2	3400	39-40	1	0	non-sari
1	2013-10-20	2014-01-27	2	1	3420	39-40	1	0	non-sari
2	2014-10-01	2015-01-07	2	2	3010	39-40	1	1	notTested	2014-10-18	2014-10-21	2014-10-27
2	2014-10-01	2015-01-07	2	1	2710	38-39	1	1	notTested	2014-10-31	2014-11-01	2014-11-10
2	2014-10-01	2015-01-07	2	1	2710	38-39	1	2	notTested	2014-11-14	2014-11-16	2014-11-24
2	2014-10-01	2015-01-07	2	1	2710	38-39	1	3	notTested	2014-12-30	2015-01-02	2015-01-08
1	2013-10-28	2014-02-03	2	2	4300	40-41	1	0	non-sari
1	2013-10-28	2014-02-03	2	1	3450	39-40	1	0	non-sari
2	2014-10-01	2015-01-07	2	1	3456	39-40	1	0	non-sari
2	2014-10-01	2015-01-07	2	1	3200	39-40	1	0	non-sari
1	2013-10-20	2014-01-26	2	1	3340	39-40	1	0	non-sari
2	2014-10-01	2015-01-06	2	1	3300	39-40	1	0	non-sari
2	2014-10-01	2015-01-06	2	2	3800	39-40	1	0	non-sari
1	2013-10-28	2014-02-02	2	1	3375	39-40	1	0	non-sari
1	2013-12-09	2014-03-15	2	1	3650	39-40	1	0	non-sari
2	2014-10-01	2015-01-05	2	2	3700	39-40	1	0	non-sari
1	2013-10-28	2014-02-01	2	1	3870	39-40	1	0	non-sari
2	2014-10-01	2015-01-05	2	1	3805	38	1	0	non-sari
2	2014-10-01	2015-01-05	2	1	3690	39-40	1	0	non-sari
1	2013-10-28	2014-01-31	2	2	3610	39-40	1	0	non-sari
2	2014-10-01	2015-01-03	2	2	3290	39	1	1	rsv	2014-11-28	2014-12-02	2014-12-08
1	2013-10-28	2014-01-30	2	1	2450	37-38	3	1	A	2014-01-01	2014-01-13	2014-02-10
2	2014-10-01	2015-01-03	2	2	3145	39-40	1	1	notTested	2014-12-14	2014-12-14	2014-12-22
1	2013-10-28	2014-01-30	2	2	3180	39-40	1	0	non-sari
1	2013-10-28	2014-01-30	2	2	3210	39-40	1	0	non-sari
1	2013-10-28	2014-01-29	2	2	3340	39-40	1	1	notTested	2013-12-17	2013-12-18	2013-12-23
1	2013-10-28	2014-01-29	2	2	3340	39-40	1	1	notTested	2013-12-26	2013-12-27	2014-01-03
1	2013-10-28	2014-01-29	2	2	3630	39-40	4	0	non-sari
1	2013-10-20	2014-01-21	2	1	3300	39-40	1	0	non-sari
2	2014-10-01	2015-01-01	2	2	2500	39-40	1	0	non-sari
1	2013-10-20	2014-01-20	2	2	3260	39-40	1	0	non-sari
1	2013-10-28	2014-01-27	2	2	3035	39-40	1	1	notTested	2013-12-21	2013-12-23	2013-12-27
2	2014-10-01	2014-12-31	2	2	2300	38-39	3	0	non-sari
2	2014-10-01	2014-12-31	2	1	3600	39-40	1	0	non-sari
1	2013-10-28	2014-01-27	2	2	3010	39-40	1	0	non-sari
2	2014-10-01	2014-12-31	2	1	3300	39-40	1	0	non-sari
2	2014-10-01	2014-12-30	2	2	3230	39-40	1	0	non-sari
2	2014-10-01	2014-12-30	2	1	2865	39-40	1	0	non-sari
1	2013-10-28	2014-01-25	2	2	4170	40-41	1	0	non-sari
1	2013-10-28	2014-01-25	2	2	3595	39-40	1	0	non-sari
1	2013-10-28	2014-01-25	2	1	2650	39-40	1	0	non-sari
1	2013-10-28	2014-01-25	2	1	2900	37-38	1	0	non-sari
2	2014-10-01	2014-12-29	2	2	2985	39-40	1	0	non-sari
2	2014-10-01	2014-12-29	2	2	3655	39-40	1	0	non-sari
1	2013-10-18	2014-01-14	2	2	2190	37-38	3	1	notTested	2013-12-16	2013-12-30	2014-01-06
2	2014-10-01	2014-12-28	2	2	3400	39-40	1	0	non-sari
1	2013-10-28	2014-01-24	2	2	3355	39-40	1	0	non-sari
1	2013-10-28	2014-01-24	2	2	3740	39-40	1	0	non-sari
1	2013-10-18	2014-01-14	2	1	2780	38-39	1	0	non-sari
1	2013-10-11	2014-01-07	2	1	3460	39-40	1	0	non-sari
1	2013-10-28	2014-01-23	2	1	3175	39-40	1	1	notTested	2013-12-13	2013-12-14	2013-12-20
1	2013-10-28	2014-01-23	2	2	2350	37-38	3	1	notTested	2013-12-25	2014-01-03	2014-01-13
2	2014-10-01	2014-12-27	2	1	3320	39-40	1	0	non-sari
2	2014-10-01	2014-12-27	2	1	3590	39-40	1	0	non-sari
1	2013-10-28	2014-01-23	2	2	3340	39-40	1	0	non-sari
1	2013-10-28	2014-01-23	2	1	3550	39-40	1	0	non-sari
1	2013-10-28	2014-01-23	2	1	2900	37-38	1	0	non-sari
2	2014-10-01	2014-12-27	2	2	3450	39-40	1	0	non-sari
1	2013-10-18	2014-01-13	2	2	3340	39-40	1	0	non-sari
1	2013-10-18	2014-01-12	2	1	3300	39-40	1	0	non-sari
2	2014-10-01	2014-12-25	2	1	3300	39	1	0	non-sari
1	2013-10-28	2014-01-21	2	2	3295	39-40	1	0	non-sari
1	2013-10-28	2014-01-21	2	1	3460	39-40	1	0	non-sari
2	2014-10-01	2014-12-25	2	1	2160	38-39	3	0	non-sari
1	2013-10-18	2014-01-11	2	1	3750	39-40	1	0	non-sari
2	2014-10-01	2014-12-25	2	1	3410	39-40	1	0	non-sari
2	2014-10-01	2014-12-24	2	1	3200	39	1	0	non-sari
1	2013-10-28	2014-01-20	2	2	3750	39-40	1	0	non-sari
2	2014-10-01	2014-12-24	2	1	3765	39-40	1	0	non-sari
1	2013-10-18	2014-01-10	2	1	3170	39-40	1	0	non-sari
1	2013-10-18	2014-01-10	2	2	2700	37-38	1	0	non-sari
1	2013-10-18	2014-01-10	2	2	3285	39-40	1	0	non-sari
2	2014-10-01	2014-12-23	2	2	3000	39-40	1	0	non-sari
1	2013-10-28	2014-01-19	2	1	3635	39-40	1	0	non-sari
2	2014-10-01	2014-12-23	2	2	3656	39	1	0	non-sari
1	2013-10-28	2014-01-19	2	1	3280	39-40	1	0	non-sari
1	2013-10-10	2013-12-31	2	2	3430	39-40	1	1	neg	2013-10-29	2013-10-30	2013-11-25
1	2013-10-28	2014-01-18	2	1	3590	39-40	1	0	non-sari
1	2013-10-18	2014-01-08	2	2	2525	39-40	1	0	non-sari
1	2013-10-18	2014-01-08	2	1	3620	39-40	1	0	non-sari
2	2014-10-01	2014-12-21	2	2	3520	39-40	1	0	non-sari
1	2013-10-28	2014-01-16	2	1	3745	39-40	4	1	notTested	2013-11-01	2013-11-01	2013-11-11
1	2013-10-28	2014-01-16	2	1	3800	40-41	1	0	non-sari
1	2013-10-28	2014-01-16	2	1	3365	39-40	1	0	non-sari
1	2013-10-18	2014-01-05	2	2	2820	39-40	1	1	notTested	2013-11-15	2013-11-20	2013-11-27
1	2013-10-18	2014-01-05	2	2	2820	39-40	1	2	neg	2013-11-29	2013-11-29	2013-12-06
2	2014-10-01	2014-12-19	2	1	3100	39-40	1	1	rsv	2014-12-10	2014-12-17	2014-12-24
1	2013-10-28	2014-01-15	2	2	3615	39-40	1	0	non-sari
1	2013-10-18	2014-01-05	2	1	3260	39-40	1	0	non-sari
2	2014-10-01	2014-12-19	2	2	3400	39-40	1	0	non-sari
2	2014-10-01	2014-12-19	2	2	3400	39-40	1	0	non-sari
2	2014-10-01	2014-12-18	2	2	3675	39-40	1	0	non-sari
1	2013-10-18	2014-01-04	2	2	2900	39-40	1	0	non-sari
2	2014-10-01	2014-12-18	2	2	3530	39-40	1	0	non-sari
1	2013-10-18	2014-01-04	2	2	3200	39-40	1	0	non-sari
1	2013-10-18	2014-01-04	2	2	3370	39-40	1	0	non-sari
2	2014-10-01	2014-12-17	2	2	2680	39-40	1	1	notTested	2014-11-20	2014-11-26	2014-12-02
2	2014-10-01	2014-12-17	2	1	3700	40-41	1	0	non-sari
2	2014-10-01	2014-12-17	2	1	3350	39-40	1	0	non-sari
2	2014-10-01	2014-12-17	2	2	3055	39-40	1	0	non-sari
2	2014-10-01	2014-12-17	2	2	3700	40	1	0	non-sari
2	2014-10-01	2014-12-17	2	2	3200	39-40	1	0	non-sari
2	2014-10-01	2014-12-16	2	1	3590	39-40	1	1	neg	2014-11-11	2014-11-18	2014-12-01
2	2014-10-01	2014-12-16	2	2	3455	39-40	1	1	notTested	2014-12-10	2014-12-12	2014-12-22
2	2014-10-01	2014-12-15	2	2	4255	39-40	1	1	notTested	2014-11-16	2014-11-16	2014-11-22
2	2014-10-01	2014-12-15	2	1	3300	40	1	0	non-sari
2	2014-10-01	2014-12-14	2	1	3500	39-40	1	0	non-sari
1	2013-11-01	2014-01-14	2	2	2555	39-40	1	0	non-sari
2	2014-10-01	2014-12-14	2	2	3300	39	1	0	non-sari
2	2014-10-01	2014-12-14	2	2	4060	40	1	0	non-sari
2	2014-10-01	2014-12-14	2	2	3400	39-40	1	0	non-sari
2	2014-12-30	2015-03-14	2	2	3100	39-40	1	0	non-sari
1	2013-10-18	2013-12-30	2	1	3885	40-41	1	0	non-sari
2	2014-10-01	2014-12-13	2	1	3300	39	1	0	non-sari
2	2014-10-01	2014-12-12	2	1	1900	36-37	3	1	notTested	2014-10-01	2014-10-02	2014-10-19
2	2014-10-01	2014-12-12	2	1	3120	39-40	1	1	rsv	2014-11-20	2014-11-24	2014-12-01
2	2014-10-01	2014-12-12	2	1	2860	39-40	1	1	rsv	2014-11-20	2014-11-23	2014-12-01
1	2013-10-28	2014-01-08	2	2	3015	39-40	3	0	non-sari
1	2013-11-01	2014-01-12	2	1	3670	39-40	1	0	non-sari
1	2013-11-01	2014-01-12	2	2	3200	39-40	1	0	non-sari
1	2013-10-18	2013-12-29	2	1	2975	39-40	1	0	non-sari
2	2014-10-01	2014-12-12	2	2	3700	40	1	0	non-sari
2	2014-10-01	2014-12-11	2	2	3440	39-40	1	0	non-sari
2	2014-10-01	2014-12-11	2	1	4080	39-40	1	0	non-sari
1	2013-10-20	2013-12-30	2	2	3480	39-40	1	0	non-sari
2	2014-10-01	2014-12-10	2	1	3400	39-40	1	0	non-sari
1	2013-10-28	2014-01-06	2	2	2900	37-38	1	0	non-sari
1	2013-10-28	2014-01-06	2	1	3265	39-40	1	0	non-sari
2	2014-10-01	2014-12-10	2	2	3010	39-40	1	0	non-sari
1	2013-10-11	2013-12-19	2	1	3090	38-39	1	1	notTested	2013-10-01	2013-10-30	2013-11-05
2	2014-10-01	2014-12-09	2	1	3570	39-40	1	1	neg	2014-11-09	2014-11-11	2014-11-22
2	2014-10-01	2014-12-09	2	1	2840	39-40	1	0	non-sari
2	2014-10-01	2014-12-09	2	2	2900	38-39	1	0	non-sari
1	2013-10-18	2013-12-26	2	2	4010	40-41	1	0	non-sari
1	2013-10-18	2013-12-26	2	2	3100	39-40	1	0	non-sari
1	2013-10-01	2013-12-09	2	2	3855	40-41	1	0	non-sari
2	2014-10-01	2014-12-08	2	2	3385	37-38	1	0	non-sari
2	2014-10-01	2014-12-08	2	2	3140	39-40	1	0	non-sari
1	2013-10-18	2013-12-25	2	2	3090	39-40	1	0	non-sari
1	2013-10-18	2013-12-25	2	2	3150	39-40	1	0	non-sari
1	2013-10-18	2013-12-25	2	1	3210	39-40	1	0	non-sari
1	2013-10-28	2014-01-02	2	1	3670	39-40	1	1	notTested	2013-11-06	2013-11-16	2013-11-25
1	2013-10-28	2014-01-02	2	1	3670	39-40	1	2	notTested	2013-12-17	2013-12-24	2014-01-07
2	2014-10-01	2014-12-06	2	1	3190	39-40	1	1	notTested	2014-11-30	2014-11-30	2014-12-08
1	2013-10-28	2014-01-02	2	1	3110	39-40	1	0	non-sari
1	2013-10-28	2014-01-01	2	2	3430	39-40	1	0	non-sari
2	2014-10-01	2014-12-04	2	2	2970	39-40	1	0	non-sari
2	2014-10-01	2014-12-04	2	1	2675	38-39	1	0	non-sari
1	2013-10-28	2013-12-31	2	2	3800	40-41	1	0	non-sari
2	2014-10-01	2014-12-04	2	1	3300	39-40	1	0	non-sari
2	2014-10-01	2014-12-03	2	1	2900	39-40	1	1	rsv	2014-11-15	2014-11-20	2014-12-01
1	2013-10-18	2013-12-19	2	1	3400	39-40	1	0	non-sari
2	2014-10-01	2014-12-01	2	1	3010	39-40	1	0	non-sari
1	2013-10-05	2013-12-05	2	2	3210	39-40	1	0	non-sari
2	2014-10-01	2014-11-30	2	1	3110	39-40	1	0	non-sari
1	2013-10-28	2013-12-27	2	2	3120	39-40	1	0	non-sari
1	2013-11-01	2013-12-31	2	2	2990	39-40	1	0	non-sari
2	2014-10-01	2014-11-29	2	2	3545	39-40	1	1	notTested	2014-10-02	2014-10-06	2014-10-13
2	2014-10-01	2014-11-29	2	2	2930	38-39	1	1	notTested	2014-11-27	2014-12-03	2014-12-09
2	2014-10-01	2014-11-29	2	2	3400	39-40	1	0	non-sari
1	2013-11-25	2014-01-23	2	1	3275	38-39	1	0	non-sari
1	2013-10-28	2013-12-25	2	2	3595	39-40	1	0	non-sari
1	2013-10-18	2013-12-15	2	2	3640	39-40	1	0	non-sari
2	2014-10-01	2014-11-27	2	1	3890	39-40	1	1	notTested	2014-10-26	2014-11-02	2014-11-07
2	2014-10-01	2014-11-27	2	2	2845	39-40	1	0	non-sari
2	2014-10-01	2014-11-26	3	1	2870	38-39	1	0	non-sari
1	2013-10-28	2013-12-23	3	2	3400	39-40	1	0	non-sari
1	2013-10-28	2013-12-23	3	1	2875	37-38	1	0	non-sari
1	2013-10-18	2013-12-13	3	2	3530	39-40	1	0	non-sari
1	2013-10-18	2013-12-13	3	2	3655	39-40	1	0	non-sari
1	2013-10-20	2013-12-15	3	2	3200	39-40	1	0	non-sari
2	2014-10-01	2014-11-25	3	2	3445	39-40	1	0	non-sari
1	2013-10-28	2013-12-22	3	1	3550	39-40	1	0	non-sari
1	2013-11-01	2013-12-26	3	2	3080	39-40	1	0	non-sari
1	2013-10-18	2013-12-12	3	1	4155	40-41	1	0	non-sari
1	2013-10-18	2013-12-12	3	1	3780	39-40	1	0	non-sari
1	2013-10-18	2013-12-12	3	2	3645	39-40	1	0	non-sari
1	2013-10-18	2013-12-12	3	2	3865	40-41	1	0	non-sari
1	2013-10-20	2013-12-14	3	2	2010	37-38	3	0	non-sari
1	2013-10-20	2013-12-14	3	1	3370	39-40	1	0	non-sari
1	2013-10-20	2013-12-14	3	1	3300	39-40	1	0	non-sari
2	2014-10-01	2014-11-25	3	2	3440	39-40	1	0	non-sari
2	2014-10-01	2014-11-24	3	1	3500	39-40	1	1	notTested	2014-10-01	2014-10-01	2014-10-08
1	2013-10-18	2013-12-11	3	1	3200	39-40	1	1	notTested	2013-11-08	2013-11-12	2013-11-18
1	2013-10-18	2013-12-11	3	1	3200	39-40	1	2	notTested	2013-11-21	2013-11-22	2013-11-22
2	2014-10-01	2014-11-24	3	1	3500	39-40	1	2	neg	2014-11-07	2014-11-10	2014-11-17
2	2014-10-01	2014-11-24	3	1	3500	39-40	1	3	notTested	2014-11-22	2014-11-25	2014-12-03
1	2013-10-28	2013-12-21	3	2	3380	39-40	1	0	non-sari
1	2013-11-01	2013-12-25	3	1	3555	39-40	1	0	non-sari
1	2013-11-01	2013-12-25	3	1	3860	39-40	1	0	non-sari
1	2013-10-20	2013-12-13	3	1	3470	39-40	1	0	non-sari
1	2013-10-20	2013-12-13	3	2	3450	39-40	1	0	non-sari
2	2014-10-01	2014-11-23	3	1	3020	39-40	1	1	neg	2014-11-02	2014-11-06	2014-11-12
1	2013-10-31	2013-12-23	3	1	3450	39-40	1	1	notTested	2013-12-13	2013-12-27	2014-01-14
2	2014-10-01	2014-11-23	3	1	3020	39-40	1	2	notTested	2014-11-18	2014-11-19	2014-11-26
2	2014-10-01	2014-11-23	3	2	3200	39-40	1	0	non-sari
1	2013-10-18	2013-12-10	3	1	3340	39-40	1	0	non-sari
1	2013-10-18	2013-12-10	3	1	3550	39-40	1	0	non-sari
1	2013-10-18	2013-12-09	3	2	3355	39-40	1	1	neg	2013-10-25	2013-11-02	2013-11-13
2	2014-10-01	2014-11-22	3	2	4000	39-40	1	0	non-sari
1	2013-10-28	2013-12-19	3	2	3850	39-40	1	0	non-sari
2	2014-10-01	2014-11-22	3	2	3200	39-40	1	0	non-sari
2	2014-10-01	2014-11-21	3	1	3850	39-40	1	0	non-sari
1	2013-10-28	2013-12-18	3	2	3140	39-40	1	0	non-sari
1	2013-10-28	2013-12-18	3	1	3150	39-40	1	0	non-sari
1	2013-11-01	2013-12-22	3	1	2820	37-38	1	0	non-sari
2	2014-10-01	2014-11-21	3	2	3070	39-40	1	0	non-sari
1	2013-10-18	2013-12-08	3	2	3200	39-40	1	0	non-sari
1	2013-10-18	2013-12-08	3	2	1950	37-38	3	0	non-sari
2	2014-10-01	2014-11-21	3	1	3770	39-40	1	0	non-sari
2	2014-10-01	2014-11-21	3	2	3500	40	1	0	non-sari
2	2014-10-01	2014-11-20	3	1	3200	39	1	0	non-sari
2	2014-10-01	2014-11-20	3	2	3200	39-40	1	0	non-sari
1	2013-10-28	2013-12-17	3	2	3105	39-40	1	0	non-sari
1	2013-11-01	2013-12-21	3	2	3150	39-40	1	0	non-sari
2	2014-10-01	2014-11-20	3	2	2945	38-39	1	0	non-sari
1	2013-10-28	2013-12-16	3	1	4300	40-41	1	0	non-sari
1	2013-10-28	2013-12-16	3	1	3250	39-40	1	0	non-sari
2	2014-10-01	2014-11-19	3	1	3250	39-40	1	0	non-sari
2	2014-10-01	2014-11-18	3	1	3890	39-40	1	1	neg	2014-11-04	2014-11-07	2014-11-17
1	2013-10-18	2013-12-05	3	2	3430	39-40	1	0	non-sari
1	2013-10-18	2013-12-05	3	1	4250	40-41	1	0	non-sari
1	2013-10-20	2013-11-04	3	2	3700	39-40	1	0	non-sari
2	2014-10-01	2014-11-18	3	2	3500	40	1	0	non-sari
2	2014-10-01	2014-11-17	3	1	3665	39-40	1	0	non-sari
2	2014-10-01	2014-11-17	3	1	3645	39-40	1	0	non-sari
1	2013-11-01	2013-12-18	3	2	3305	39-40	1	0	non-sari
1	2013-11-01	2013-12-18	3	2	3260	39-40	1	0	non-sari
1	2013-10-20	2013-12-06	3	2	3450	39-40	1	0	non-sari
1	2013-10-11	2013-11-27	3	1	3300	39-40	1	0	non-sari
1	2013-10-20	2013-12-05	3	2	2575	37-38	1	1	notTested	2013-10-01	2013-10-08	2013-10-16
1	2013-10-20	2013-12-05	3	2	2825	37-38	1	1	notTested	2013-10-03	2013-10-14	2013-10-18
2	2014-10-01	2014-11-15	3	1	3580	39-40	1	0	non-sari
1	2013-10-28	2013-12-12	3	1	4660	40-41	1	0	non-sari
1	2013-10-18	2013-12-02	3	2	3415	39-40	1	0	non-sari
1	2013-10-18	2013-12-02	3	2	3520	39-40	1	0	non-sari
1	2013-10-20	2013-12-04	3	2	4060	40-41	1	0	non-sari
1	2013-10-20	2013-12-02	3	1	3333	39-40	1	0	non-sari
2	2014-10-01	2014-11-13	3	2	3400	39-40	1	0	non-sari
1	2013-10-20	2013-12-02	3	1	3580	39-40	1	0	non-sari
2	2014-10-01	2014-11-11	3	2	3350	39-40	1	0	non-sari
1	2013-10-18	2013-11-28	3	1	3060	39-40	6	0	non-sari
1	2013-10-18	2013-11-27	3	2	3270	39-40	1	1	notTested	2013-10-18	2013-11-03	2013-11-03
2	2014-10-01	2014-11-10	3	1	3360	39-40	1	0	non-sari
1	2013-10-18	2013-11-27	3	2	3570	39-40	1	0	non-sari
1	2013-10-18	2013-11-27	3	1	2550	38-39	1	0	non-sari
1	2013-10-18	2013-11-27	3	1	3735	39-40	1	0	non-sari
1	2013-10-18	2013-11-27	3	1	3130	39-40	1	0	non-sari
1	2013-10-20	2013-11-29	3	1	3280	39-40	1	0	non-sari
1	2013-10-20	2013-11-29	3	1	3400	39-40	1	0	non-sari
1	2013-10-20	2013-11-29	3	2	3985	39-40	1	0	non-sari
2	2014-10-01	2014-11-09	3	1	3260	39-40	1	1	notTested	2014-10-26	2014-10-30	2014-11-07
2	2014-10-01	2014-11-09	3	1	3800	39-40	1	0	non-sari
1	2013-10-18	2013-11-26	3	1	3290	39-40	1	0	non-sari
1	2013-10-18	2013-11-26	3	1	3245	39-40	1	0	non-sari
1	2013-10-20	2013-11-28	3	1	3835	40-41	1	0	non-sari
1	2013-10-18	2013-11-25	3	1	3305	39-40	1	0	non-sari
1	2013-10-18	2013-11-25	3	2	3300	39-40	1	0	non-sari
1	2013-10-18	2013-11-25	3	2	3140	39-40	1	0	non-sari
1	2013-10-20	2013-11-27	3	1	3525	39-40	1	0	non-sari
1	2013-10-20	2013-11-27	3	1	3950	39-40	1	0	non-sari
2	2014-10-01	2014-11-08	3	2	3200	39-40	1	0	non-sari
2	2014-10-01	2014-11-07	3	1	3480	39-40	1	0	non-sari
2	2014-10-01	2014-11-07	3	2	3200	39-40	1	0	non-sari
2	2014-10-01	2014-11-07	3	1	3600	39-40	1	0	non-sari
2	2014-10-01	2014-11-06	3	1	2730	39-40	1	0	non-sari
1	2013-10-18	2013-11-23	3	2	3250	39-40	1	0	non-sari
1	2013-10-18	2013-11-23	3	1	3090	39-40	1	0	non-sari
1	2013-10-18	2013-11-23	3	2	3150	39-40	1	0	non-sari
1	2013-10-20	2013-11-25	3	1	3690	39-40	1	0	non-sari
1	2013-10-18	2013-11-22	3	1	3053	39-40	1	1	notTested	2013-10-01	2013-10-13	2013-10-23
2	2014-10-01	2014-11-05	3	2	3020	39-40	1	0	non-sari
2	2014-10-01	2014-11-04	3	2	2840	39-40	1	0	non-sari
1	2013-10-28	2013-12-01	3	2	3780	39-40	1	0	non-sari
1	2013-10-18	2013-11-21	3	2	3585	39-40	1	0	non-sari
1	2013-10-20	2013-11-23	3	1	3405	39-40	1	0	non-sari
1	2013-10-20	2013-11-23	3	1	3250	39-40	1	0	non-sari
1	2013-10-18	2013-11-19	3	2	3450	39-40	1	0	non-sari
1	2013-10-20	2013-11-21	3	1	3210	39-40	1	0	non-sari
1	2013-10-18	2013-11-18	3	2	3050	39-40	1	0	non-sari
1	2013-10-18	2013-11-18	3	1	3875	40-41	1	0	non-sari
1	2013-10-20	2013-11-20	3	2	3210	39-40	1	0	non-sari
1	2013-10-18	2013-11-17	3	1	2450	37-38	3	0	non-sari
1	2013-10-20	2013-11-19	3	2	3010	39-40	1	0	non-sari
1	2013-10-20	2013-11-19	3	1	3210	39-40	1	0	non-sari
2	2014-10-01	2014-10-30	3	1	3940	39-40	1	0	non-sari
1	2013-10-20	2013-11-18	3	1	4020	40-41	1	0	non-sari
2	2014-10-01	2014-10-29	3	2	3350	39-40	1	0	non-sari
2	2014-10-01	2014-10-29	3	1	2830	38-39	1	0	non-sari
1	2013-11-04	2013-12-02	3	1	3480	39-40	1	0	non-sari
2	2014-10-01	2014-10-28	3	2	3950	39-40	1	0	non-sari
2	2014-10-01	2014-10-28	3	1	3200	39-40	1	0	non-sari
2	2014-10-01	2014-10-28	3	1	3570	39-40	1	0	non-sari
2	2014-10-01	2014-10-28	3	2	3330	39-40	1	0	non-sari
1	2013-10-31	2013-11-27	3	1	3610	39-40	1	0	non-sari
1	2013-10-20	2013-11-15	3	2	3200	39-40	1	1	notTested	2013-10-16	2013-11-05	2013-11-09
2	2014-10-01	2014-10-26	3	1	3300	39-40	1	0	non-sari
2	2014-10-01	2014-10-26	3	1	3550	39-40	1	0	non-sari
1	2013-10-20	2013-11-14	3	1	3260	39-40	1	0	non-sari
2	2014-10-01	2014-10-25	3	1	3600	39-40	1	0	non-sari
1	2013-10-20	2013-11-13	3	1	3060	39-40	1	0	non-sari
1	2013-10-20	2013-11-13	3	1	3520	39-40	1	0	non-sari
1	2013-10-20	2013-11-13	3	1	3670	39-40	1	0	non-sari
2	2014-10-01	2014-10-25	3	2	3080	39	1	0	non-sari
1	2013-10-20	2013-11-12	3	2	3350	39-40	1	0	non-sari
1	2013-10-20	2013-11-12	3	1	3460	39-40	1	0	non-sari
2	2014-10-01	2014-10-24	3	2	3100	39-40	1	0	non-sari
1	2013-10-20	2013-11-12	3	1	3300	39-40	1	0	non-sari
2	2014-10-01	2014-10-24	3	2	2730	38-39	1	0	non-sari
2	2014-10-01	2014-10-23	3	1	3650	39-40	1	0	non-sari
1	2013-10-20	2013-11-11	3	1	2980	37-38	1	0	non-sari
1	2013-10-20	2013-11-11	3	1	3295	39-40	1	0	non-sari
2	2014-10-01	2014-10-22	3	1	3840	39-40	1	0	non-sari
2	2014-10-01	2014-10-22	3	2	3500	39-40	1	0	non-sari
2	2014-10-01	2014-10-22	3	1	3200	39-40	1	0	non-sari
1	2013-10-05	2013-10-26	3	2	3370	39-40	1	0	non-sari
2	2014-10-01	2014-10-21	3	1	3420	39-40	1	0	non-sari
1	2013-10-20	2013-11-09	3	2	2580	37-38	1	0	non-sari
1	2013-10-20	2013-11-09	3	2	3295	39-40	1	0	non-sari
2	2014-10-01	2014-10-20	3	2	3600	39-40	1	0	non-sari
1	2013-10-20	2013-11-08	3	2	3660	39-40	1	0	non-sari
2	2014-10-01	2014-10-19	3	2	3350	39-40	1	0	non-sari
2	2014-10-01	2014-10-19	3	2	2770	39-40	1	0	non-sari
2	2014-10-01	2014-10-18	3	1	2840	39-40	1	0	non-sari
2	2014-10-01	2014-10-18	3	1	3140	39-40	1	0	non-sari
1	2013-10-20	2013-11-06	3	2	3570	39-40	1	0	non-sari
1	2013-10-20	2013-11-06	3	2	3470	39-40	1	0	non-sari
1	2013-10-20	2013-11-05	3	2	3125	39-40	1	0	non-sari
1	2013-10-20	2013-11-04	3	1	1700	36-37	3	1	notTested	2013-10-08	2013-10-10	2013-10-20
1	2013-10-20	2013-11-04	3	1	3285	39-40	1	0	non-sari
1	2013-10-20	2013-11-04	3	2	3270	39-40	1	0	non-sari
1	2013-10-20	2013-11-04	3	2	2950	39-40	1	0	non-sari
2	2014-10-01	2014-10-15	3	1	3400	39-40	1	0	non-sari
2	2014-10-01	2014-10-15	3	2	3200	39-40	1	0	non-sari
2	2014-10-01	2014-10-15	3	1	3250	39-40	1	0	non-sari
1	2013-10-20	2013-11-03	3	2	3280	39-40	1	0	non-sari
1	2013-10-20	2013-11-02	3	1	3190	39-40	1	1	notTested	2013-10-10	2013-10-25	2013-11-05
2	2014-10-01	2014-10-14	3	1	3180	39-40	1	0	non-sari
2	2014-10-01	2014-10-14	3	2	3610	39-40	1	0	non-sari
2	2014-10-01	2014-10-13	3	1	3500	39-40	1	0	non-sari
1	2013-10-20	2013-11-01	3	1	3415	39-40	1	0	non-sari
1	2013-10-20	2013-11-01	3	2	3605	39-40	1	0	non-sari
1	2013-10-20	2013-11-01	3	1	3425	39-40	1	0	non-sari
1	2013-10-20	2013-10-31	3	2	2465	37-38	1	0	non-sari
1	2013-10-20	2013-10-31	3	2	2110	37-38	3	0	non-sari
1	2013-10-20	2013-10-31	3	2	3815	40-41	1	0	non-sari
1	2013-10-20	2013-10-31	3	1	3400	39-40	1	0	non-sari
1	2013-10-20	2013-10-31	3	1	3145	39-40	1	0	non-sari
1	2013-10-20	2013-10-31	3	2	3590	39-40	1	0	non-sari
2	2014-10-01	2014-10-11	3	1	3930	39-40	1	0	non-sari
2	2014-10-01	2014-10-10	3	2	3230	39-40	1	0	non-sari
2	2014-10-01	2014-10-10	3	2	3220	39-40	1	0	non-sari
2	2014-10-01	2014-10-09	3	2	3480	39-40	1	0	non-sari
2	2014-10-01	2014-10-09	3	2	3210	39-40	1	0	non-sari
2	2014-10-01	2014-10-09	3	2	2510	38-39	1	0	non-sari
1	2013-10-20	2013-10-28	3	1	2970	39-40	1	0	non-sari
1	2013-10-20	2013-10-28	3	1	3615	39-40	1	0	non-sari
2	2014-10-01	2014-10-08	3	1	3090	39-40	1	0	non-sari
1	2013-10-20	2013-10-27	3	2	2810	39-40	1	0	non-sari
1	2013-10-20	2013-10-27	3	2	3820	40-41	1	0	non-sari
2	2014-10-01	2014-10-08	3	2	3500	39-40	1	0	non-sari
2	2014-10-01	2014-10-07	3	2	2300	36-37	3	0	non-sari
2	2014-10-01	2014-10-07	3	1	2200	39-40	3	0	non-sari
2	2014-10-01	2014-10-07	3	1	3400	39-40	1	0	non-sari
2	2014-10-01	2014-10-07	3	2	3650	39-40	1	0	non-sari
2	2014-10-01	2014-10-07	3	1	3400	40	1	0	non-sari
1	2013-10-05	2013-10-11	3	2	3100	39-40	1	0	non-sari
2	2014-10-01	2014-10-06	3	2	2880	38-39	1	0	non-sari
2	2014-10-01	2014-10-06	3	2	3020	39-40	1	0	non-sari
2	2014-10-01	2014-10-06	3	2	3020	39-40	1	0	non-sari
2	2014-10-01	2014-10-06	3	2	3290	39-40	1	0	non-sari
1	2013-10-20	2013-10-25	3	1	3670	39-40	1	0	non-sari
1	2013-10-20	2013-10-24	3	1	3205	39-40	1	0	non-sari
1	2013-10-20	2013-10-24	3	2	2645	37-38	1	0	non-sari
2	2014-10-02	2014-10-06	3	1	2000	36-37	3	0	non-sari
1	2013-10-20	2013-10-23	3	2	3350	39-40	1	0	non-sari
2	2014-10-01	2014-10-03	3	2	2490	38-39	3	0	non-sari
2	2014-10-01	2014-10-03	3	2	3000	39-40	1	0	non-sari
2	2014-10-01	2014-10-03	3	1	2740	38-39	1	0	non-sari
1	2013-10-20	2013-10-22	3	2	3210	39-40	1	0	non-sari
1	2013-10-20	2013-10-22	3	1	3550	39-40	1	0	non-sari
1	2013-10-20	2013-10-22	3	2	3100	39-40	1	0	non-sari
1	2013-10-20	2013-10-22	3	1	3345	39-40	1	0	non-sari
2	2014-10-01	2014-10-02	3	1	2550	39	1	0	non-sari
1	2013-10-20	2013-10-21	3	1	3670	39-40	1	0	non-sari
1	2013-10-20	2013-10-21	3	2	3200	39-40	1	0	non-sari
1	2013-10-20	2013-10-21	3	2	3670	39-40	1	0	non-sari

## Sheet: Data dictionary
Column name	Description	Format
season	Influenza season	1 = 2013/14; 2 = 2014/15
Gender		1 = Male; 2 = Female
BirthWt	Birth weight
GestAgeDel	Gestational age at delivery (weeks)
MedCondBirth	Presence of birth defects
InfectionOrder	No. of ILI episodes detected	0 = none; 1 = 1st; 2 = 2nd; 3 = 3rd
SympResD	Days for symptom resolution
EnrolD	Date of enrolment	Month-Date-Year
LeaveD	Date of leaving study	Month-Date-Year
SympD	Date of symptom onset	Month-Date-Year
AdmitD	Date of admission	Month-Date-Year
DischargeD	Date of discharge	Month-Date-Year
AgeEnrolGp	Age group at enrolment	2 = 0-55 days; 2 = 56-111days; 3 = 112-167days
